# Supplementary material
Source: PubMed Central journal article supplement (PMC8496927)
Supplement: mmc1.pdf [file mmc1.pdf]

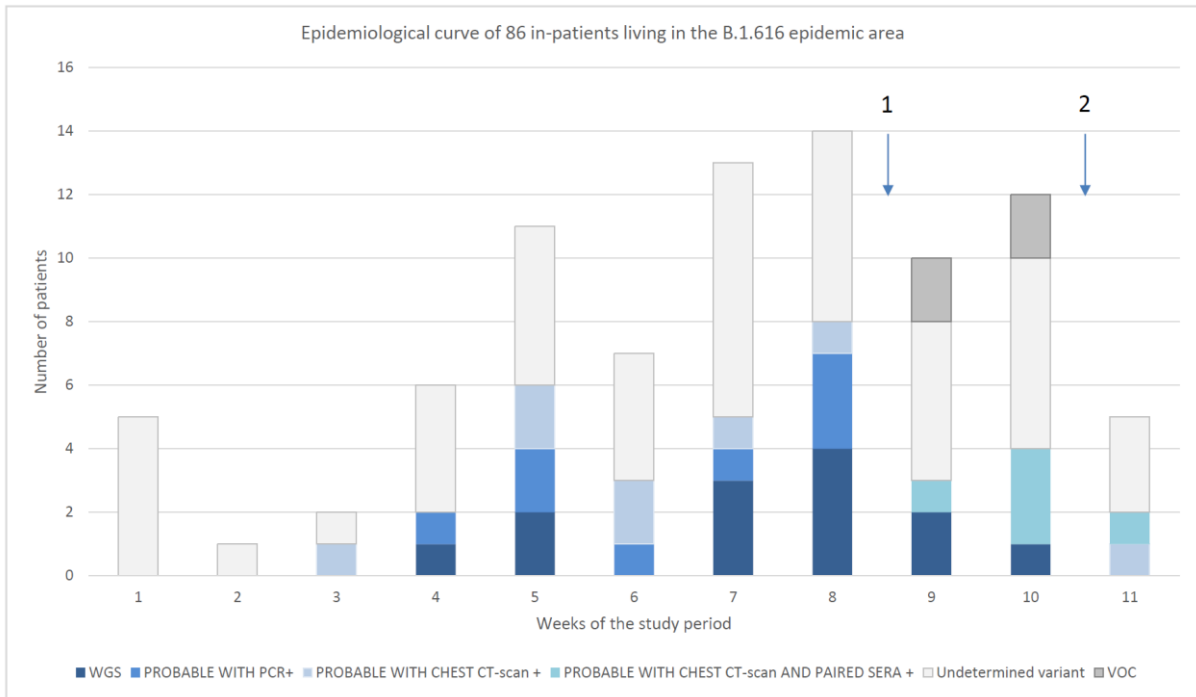

1: Hospitalization in single bedroom in the B.1.616 area.

2: Definition of B.1.616 cases by the French public health agency and the National Reference Center for Respiratory Viruses ([https://solidarites-sante.gouv.fr/IMG/pdf/annexe\\_1\\_-\\_covid-19\\_definition\\_de\\_cas\\_-\\_lannion-2.pdf](https://solidarites-sante.gouv.fr/IMG/pdf/annexe_1_-_covid-19_definition_de_cas_-_lannion-2.pdf)).
