# Supplementary material
Source: PubMed Central journal article supplement (PMC8496927)
Supplement: mmc5.pdf [file mmc5.pdf]

| GISAID_accession                                                                                                                                      | originating_lab                                                                                                                                                                                                                                                                                                                                                                                                                                                                               | submitting_lab                                                                                                                                                                                                                                                                                                                                                            | authors                          |
|-------------------------------------------------------------------------------------------------------------------------------------------------------|-----------------------------------------------------------------------------------------------------------------------------------------------------------------------------------------------------------------------------------------------------------------------------------------------------------------------------------------------------------------------------------------------------------------------------------------------------------------------------------------------|---------------------------------------------------------------------------------------------------------------------------------------------------------------------------------------------------------------------------------------------------------------------------------------------------------------------------------------------------------------------------|----------------------------------|
| EPI_ISL_1167055,EPI_ISL_1167058,EPI_ISL_1167075,EPI_ISL_1167086                                                                                       | Dr. Andrija Stampar" Teaching Institute of Public Health, Department of Clinical Microbiology"                                                                                                                                                                                                                                                                                                                                                                                                | Istituto di Genomica Applicata                                                                                                                                                                                                                                                                                                                                            | Jasmina Vranes et al             |
| EPI_ISL_993056                                                                                                                                        | Dr. Andrija Stampar" Teaching Institute of Public Health, Department of Clinical Microbiology"                                                                                                                                                                                                                                                                                                                                                                                                | Institute of Applied Genomics                                                                                                                                                                                                                                                                                                                                             | Jasmina Vranes et al             |
| EPI_ISL_468145,EPI_ISL_468149,EPI_ISL_468153,EPI_ISL_468156                                                                                           | [Romania, Bucharest] National Institute for Infectious Diseases "Prof. Dr. Matei Balș"                                                                                                                                                                                                                                                                                                                                                                                                        | [Romania, Bucharest] National Institute for Infectious Diseases "Prof. Dr. Matei Balș"                                                                                                                                                                                                                                                                                    | Leontina Banica et al            |
| EPI_ISL_699655,EPI_ISL_707697,EPI_ISL_707791,EPI_ISL_733500,EPI_ISL_763065,EPI_ISL_763067,EPI_ISL_794735                                              | 1-Laboratory of Microbiology, National Reference Lab, Charles Nicolle Hospital; 2-University of Tunis ElManar, Faculty of Medicine of Tunis, LR99ES09, Tunis, Tunisia                                                                                                                                                                                                                                                                                                                         | 1-Clinical and Experimental Pharmacology Lab, LR16SP02, National Center of Pharmacovigilance, University of Tunis El Manar, Tunis, Tunisia. 2- Neurodegenerative diseases and psychiatric troubles, LR18SP03, Razi Hospital, University of Tunis El Manar, Tunis, Tunisia. 3- Ministry of Health, National Observatory of New and Emerging Diseases, 1006, Tunis, Tunisia | Ilhem Boutiba-Ben Boubaker et al |
| EPI_ISL_455442                                                                                                                                        | 1. ViroGenetics - BSL3 Laboratory of Virology, Małopolska Centre of Biotechnology, Jagiellonian University; 2. II Department of Internal Medicine, Faculty of Medicine, Jagiellonian University Medical College; 3. Narodowy Instytut Zdrowia Publicznego – Państwowy Zakład Higieny (NIZP-PZH)                                                                                                                                                                                               | 1. ViroGenetics - BSL3 Laboratory of Virology, Małopolska Centre of Biotechnology, Jagiellonian University; 2. II Department of Internal Medicine, Faculty of Medicine, Jagiellonian University Medical College; 3. Narodowy Instytut Zdrowia Publicznego – Państwowy Zakład Higieny (NIZP-PZH).                                                                          | Katarzyna Pancer et al           |
| EPI_ISL_882703,EPI_ISL_954190                                                                                                                         | 1.AO Universitaria 'S. Giovanni di Dio e Ruggi D'Aragona, Scuola Medica Salernitana' Hospital / 2.UOC di Virologia e Microbiologia, Università della Campania 'L. Vanvitelli' / 3.AO Universitaria 'Federico II' Napoli Hospital / 4.AORN 'San Giuseppe Moscati' Avellino Hospital / 5.AO 'San Pio - presidio G. Rummo' Benevento Hospital / 6.AO 'Sant'Anna e San Sebastiano' Caserta Hospital / 7.PO 'Maria Santissima Addolorata' Eboli Hospital / 8.Biogem Istituto di Ricerche Genetiche | 1. Genome Research Center for Health (CRGS) / 2. Laboratory of Molecular Medicine and Genomics(LMMGe) / 3. Center for Research in Pure and Applied Mathematics (CRMPA)                                                                                                                                                                                                    | Giorgio Giurato et al            |
| EPI_ISL_640056                                                                                                                                        | 2 Military Hospital wc MAA                                                                                                                                                                                                                                                                                                                                                                                                                                                                    | NHLS/UCT                                                                                                                                                                                                                                                                                                                                                                  | Arash Iranzadeh et al            |
| EPI_ISL_517616,EPI_ISL_517634,EPI_ISL_517635,EPI_ISL_517642,EPI_ISL_517643,EPI_ISL_517657,EPI_ISL_517661,EPI_ISL_517662,EPI_ISL_518811,EPI_ISL_518812 | Academic Hospital Paramaribo                                                                                                                                                                                                                                                                                                                                                                                                                                                                  | Erasmus Medical Center                                                                                                                                                                                                                                                                                                                                                    | Bas Oude Munnink et al           |
| EPI_ISL_500793                                                                                                                                        | Akershus University Hospital, Department for Microbiology and Infectious Disease Control                                                                                                                                                                                                                                                                                                                                                                                                      | Norwegian Institute of Public Health, Department of Virology                                                                                                                                                                                                                                                                                                              | Kathrine Stene-Johansen et al    |
| EPI_ISL_747240                                                                                                                                        | Al Islam Hospital                                                                                                                                                                                                                                                                                                                                                                                                                                                                             | West Java Health Laboratory; School of Life Sciences and Technology, Institut Teknologi Bandung                                                                                                                                                                                                                                                                           | Azzania Fibriani et al           |
| EPI_ISL_739660                                                                                                                                        | Al-Quds Nutrition and Health Research Institute, Al-Quds University                                                                                                                                                                                                                                                                                                                                                                                                                           | Al-Quds Nutrition and Health Research Institute, Al-Quds University                                                                                                                                                                                                                                                                                                       | Nasereddin et al                 |
| EPI_ISL_672095                                                                                                                                        | Alameda County Public Health Lab                                                                                                                                                                                                                                                                                                                                                                                                                                                              | Chan-Zuckerberg Biohub                                                                                                                                                                                                                                                                                                                                                    | CZB Cliahub Consortium et al     |
| EPI_ISL_1287290                                                                                                                                       | Alexianer DaKS GmbH (eigenes IT-Tochterunternehmen der Alexianer Krankenhäuser)                                                                                                                                                                                                                                                                                                                                                                                                               | Robert Koch Institute                                                                                                                                                                                                                                                                                                                                                     | et al                            |
| EPI_ISL_528702                                                                                                                                        | Alsafar - Khalifa University Abu Dhabi                                                                                                                                                                                                                                                                                                                                                                                                                                                        | Alsafar - Khalifa University Abu Dhabi                                                                                                                                                                                                                                                                                                                                    | Andreas Henschel et al           |
| EPI_ISL_458150                                                                                                                                        | ANOUAL                                                                                                                                                                                                                                                                                                                                                                                                                                                                                        | ANOUAL                                                                                                                                                                                                                                                                                                                                                                    | Jouali Farah et al               |
| EPI_ISL_909955,EPI_ISL_909960                                                                                                                         | Apollo Hospitals                                                                                                                                                                                                                                                                                                                                                                                                                                                                              | CSIR-Centre for Cellular and Molecular Biology                                                                                                                                                                                                                                                                                                                            | Onkar Kulkarni et al             |
| EPI_ISL_682235                                                                                                                                        | AREA DE SALUD ALAJUELA NORTE - CLINICA DR. MARCIAL RODRIGUEZ                                                                                                                                                                                                                                                                                                                                                                                                                                  | Incienza, Instituto Costarricense de Investigación y Enseñanza en Nutrición y Salud                                                                                                                                                                                                                                                                                       | Francisco Duarte et al           |
| EPI_ISL_770030                                                                                                                                        | Area De Salud Buenos Aires                                                                                                                                                                                                                                                                                                                                                                                                                                                                    | Incienza, Instituto Costarricense de Investigación y Enseñanza en Nutrición y Salud                                                                                                                                                                                                                                                                                       | Francisco Duarte et al           |
| EPI_ISL_914794,EPI_ISL_1067588                                                                                                                        | AREA DE SALUD BUENOS AIRES                                                                                                                                                                                                                                                                                                                                                                                                                                                                    | Incienza, Instituto Costarricense de Investigación y Enseñanza en Nutrición y Salud                                                                                                                                                                                                                                                                                       | Francisco Duarte et al           |
| EPI_ISL_527751,EPI_ISL_770008                                                                                                                         | Area De Salud Corredores                                                                                                                                                                                                                                                                                                                                                                                                                                                                      | Incienza, Instituto Costarricense de Investigación y Enseñanza en Nutrición y Salud                                                                                                                                                                                                                                                                                       | Francisco Duarte et al           |
| EPI_ISL_1196424                                                                                                                                       | AREA DE SALUD DESAMPARADOS 1 - CLINICA DR. MARCIAL FALLAS                                                                                                                                                                                                                                                                                                                                                                                                                                     | Incienza, Instituto Costarricense de Investigación y Enseñanza en Nutrición y Salud                                                                                                                                                                                                                                                                                       | Francisco Duarte et al           |
| EPI_ISL_491437                                                                                                                                        | Area de Salud Escazu (Coopesana)                                                                                                                                                                                                                                                                                                                                                                                                                                                              | Incienza, Instituto Costarricense de Investigación y Enseñanza en Nutrición y Salud                                                                                                                                                                                                                                                                                       | Francisco Duarte et al           |

|                                                                                                 |                                                                                                     |                                                                                                                                                                                                                     |                           |
|-------------------------------------------------------------------------------------------------|-----------------------------------------------------------------------------------------------------|---------------------------------------------------------------------------------------------------------------------------------------------------------------------------------------------------------------------|---------------------------|
| EPI_ISL_1067605                                                                                 | AREA DE SALUD HATILLO - CLINICA DR. SOLON NUÑEZ                                                     | Incienza, Instituto Costarricense de Investigación y Enseñanza en Nutrición y Salud                                                                                                                                 | Francisco Duarte et al    |
| EPI_ISL_512666,EPI_ISL_512667,EPI_ISL_770000                                                    | Area De Salud La Cruz                                                                               | Incienza, Instituto Costarricense de Investigación y Enseñanza en Nutrición y Salud                                                                                                                                 | Francisco Duarte et al    |
| EPI_ISL_512660                                                                                  | Area De Salud Los Chiles                                                                            | Incienza, Instituto Costarricense de Investigación y Enseñanza en Nutrición y Salud                                                                                                                                 | Francisco Duarte et al    |
| EPI_ISL_770005                                                                                  | Area De Salud Moravia                                                                               | Incienza, Instituto Costarricense de Investigación y Enseñanza en Nutrición y Salud                                                                                                                                 | Francisco Duarte et al    |
| EPI_ISL_1201439                                                                                 | AREA DE SALUD PAVAS (COOPESALUD)                                                                    | Incienza, Instituto Costarricense de Investigación y Enseñanza en Nutrición y Salud                                                                                                                                 | Francisco Duarte et al    |
| EPI_ISL_770017                                                                                  | Area De Salud Perez Zeledon                                                                         | Incienza, Instituto Costarricense de Investigación y Enseñanza en Nutrición y Salud                                                                                                                                 | Francisco Duarte et al    |
| EPI_ISL_769989,EPI_ISL_770023                                                                   | Area De Salud San Francisco-San Antonio (Coopesana)                                                 | Incienza, Instituto Costarricense de Investigación y Enseñanza en Nutrición y Salud                                                                                                                                 | Francisco Duarte et al    |
| EPI_ISL_770007                                                                                  | Area De Salud San Rafael                                                                            | Incienza, Instituto Costarricense de Investigación y Enseñanza en Nutrición y Salud                                                                                                                                 | Francisco Duarte et al    |
| EPI_ISL_509505                                                                                  | Area of Virology, Serology and Virology Division (SAViD), New South Wales Health Pathology Randwick | Area of Virology, Serology and Virology Division (SAViD), New South Wales Health Pathology Randwick                                                                                                                 | Rawlinson et al           |
| EPI_ISL_678350,EPI_ISL_717711                                                                   | Area of Virology, Serology and Virology Division (SAViD), New South Wales Health Pathology Randwick | Virology Research Laboratory; Area of Virology, Serology and Virology Division (SAViD), New South Wales Health Pathology Randwick                                                                                   | Foster et al              |
| EPI_ISL_542237                                                                                  | ASST GOM Niguarda                                                                                   | Dep. Of Oncology and Hemato-Oncology University of Milan                                                                                                                                                            | Claudia Alteri et al      |
| EPI_ISL_413490                                                                                  | Auckland Hospital                                                                                   | Institute of Environmental Science and Research (ESR)                                                                                                                                                               | Matt Storey et al         |
| EPI_ISL_583573                                                                                  | Austrian Agency for Health and Food Safety (AGES)                                                   | Bergthaler laboratory, CeMM Research Center for Molecular Medicine of the Austrian Academy of Sciences                                                                                                              | Alexandra Popa et al      |
| EPI_ISL_853971,EPI_ISL_853977                                                                   | Austrian Agency for Health and Food Safety (AGES)                                                   | Bergthaler laboratory, CeMM Research Center for Molecular Medicine of the Austrian Academy of Sciences                                                                                                              | Lukas Endler et al        |
| EPI_ISL_1081798,EPI_ISL_1081802,EPI_ISL_1081804,EPI_ISL_1081805,EPI_ISL_1081807,EPI_ISL_1081808 | Baguio General Hospital and Medical Center                                                          | Philippine Genome Center                                                                                                                                                                                            | Francis A. Tablizo et al  |
| EPI_ISL_1159375                                                                                 | Bahman Hospital                                                                                     | Laboratory of Molecular Biology and Cancer Immunology, Lebanese University Public Health England                                                                                                                    | Fadi Abdel Sater et al    |
| EPI_ISL_791978                                                                                  | Balai Labkes Lampung                                                                                | National Institute of Health Research and Development                                                                                                                                                               | Nugraha et al             |
| EPI_ISL_434693                                                                                  | Bamrasnaradura hospital                                                                             | National Institute of Health. Department of medical Sciences, Ministry of Public Health, Thailand                                                                                                                   | Pilailuk et al            |
| EPI_ISL_403962,EPI_ISL_403963                                                                   | Bamrasnaradura Hospital                                                                             | 1. Department of Medical Sciences, Ministry of Public Health, Thailand 2. Thai Red Cross Emerging Infectious Diseases - Health Science Centre 3. Department of Disease Control, Ministry of Public Health, Thailand | Pilailuk et al            |
| EPI_ISL_860186                                                                                  | Bangalore Medical College and Research Institute                                                    | Department of Neurovirology, National Institute of Mental Health and Neurosciences (NIMHANS)                                                                                                                        | Chitra Pattabiraman et al |
| EPI_ISL_995709,EPI_ISL_995710,EPI_ISL_995724,EPI_ISL_995763                                     | BANGALORE MEDICAL COLLEGE AND RESEARCH INSTITUTE                                                    | Department of Neurovirology, National Institute of Mental Health and Neurosciences (NIMHANS)                                                                                                                        | Chitra Pattabiraman et al |
| EPI_ISL_843128                                                                                  | Barts Health NHS Trust                                                                              | COVID-19 Genomics UK (COG-UK) Consortium                                                                                                                                                                            | CUTINO-MOGUEL et al       |
| EPI_ISL_833333,EPI_ISL_833334                                                                   | Batangas City Health Office                                                                         | Research Institute for Tropical Medicine                                                                                                                                                                            | Hannah Leah Morito et al  |
| EPI_ISL_1144010                                                                                 | Bayerisches Landesamt für Gesundheit und Lebensmittelsicherheit (LGL)                               | Robert Koch Institute                                                                                                                                                                                               | et al                     |
| EPI_ISL_747244,EPI_ISL_803912,EPI_ISL_1250853,EPI_ISL_1250855,EPI_ISL_1250856,EPI_ISL_1250858   | BBMP Urban PHC                                                                                      | Department of Neurovirology, National Institute of Mental Health and Neurosciences (NIMHANS)                                                                                                                        | Chitra Pattabiraman et al |
| EPI_ISL_415580,EPI_ISL_415577,EPI_ISL_415578,EPI_ISL_412965                                     | BCCDC Public Health Laboratory                                                                      | BCCDC Public Health Laboratory                                                                                                                                                                                      | Harrigan et al            |
| EPI_ISL_973567,EPI_ISL_974478,EPI_ISL_974493,EPI_ISL_974721,EPI_ISL_975486,EPI_ISL_976529       | BCCDC Public Health Laboratory                                                                      | BCCDC Public Health Laboratory                                                                                                                                                                                      | Prystajeky Natalie et al  |
| EPI_ISL_1015370                                                                                 | BCRM Cherbourg                                                                                      | IRBA, 2MI                                                                                                                                                                                                           | GORGE O. et al            |

|                                                                                                                                                                                                                                                                                                                                                                                                                                                                   |                                                                                       |                                                                                                                        |                                 |
|-------------------------------------------------------------------------------------------------------------------------------------------------------------------------------------------------------------------------------------------------------------------------------------------------------------------------------------------------------------------------------------------------------------------------------------------------------------------|---------------------------------------------------------------------------------------|------------------------------------------------------------------------------------------------------------------------|---------------------------------|
| EPI_ISL_1117376,EPI_ISL_1117378,EPI_ISL_1168770                                                                                                                                                                                                                                                                                                                                                                                                                   | Beijing Center for Disease Prevention and Control                                     | Beijing Center for Disease Prevention and Control                                                                      | Yang Pan et al                  |
| EPI_ISL_509711,EPI_ISL_509712,EPI_ISL_509713,EPI_ISL_509714                                                                                                                                                                                                                                                                                                                                                                                                       | Belize Ministry of Health                                                             | Pathogen Discovery, Respiratory Viruses Branch, Division of Viral Diseases, Centers for Disease Control and Prevention | Jing Zhang et al                |
| EPI_ISL_780384,EPI_ISL_780385,EPI_ISL_780386,EPI_ISL_780387,EPI_ISL_780390,EPI_ISL_780392,EPI_ISL_780393,EPI_ISL_780395,EPI_ISL_780396,EPI_ISL_780404                                                                                                                                                                                                                                                                                                             | Bermuda Government Molecular Diagnostics Laboratory (MDL)                             | Respiratory Virus Unit, National Infection Service, Public Health England                                              | PHE Covid Sequencing Team et al |
| EPI_ISL_430843                                                                                                                                                                                                                                                                                                                                                                                                                                                    | Bethany Hospital                                                                      | Research Institute for Tropical Medicine                                                                               | Medado et al                    |
| EPI_ISL_1273093,EPI_ISL_1273088,EPI_ISL_1273089                                                                                                                                                                                                                                                                                                                                                                                                                   | Biochemistry and Molecular Biology Department-Faculty of Medicine, Al-Quds University | Biochemistry and Molecular Biology Department-Faculty of Medicine, Al-Quds University                                  | Ereqat et al                    |
| EPI_ISL_429999,EPI_ISL_430003,EPI_ISL_430013,EPI_ISL_430012,EPI_ISL_450187,EPI_ISL_450188,EPI_ISL_450189,EPI_ISL_635777,EPI_ISL_635778,EPI_ISL_635779,EPI_ISL_635780,EPI_ISL_635781,EPI_ISL_635782,EPI_ISL_730263,EPI_ISL_730461,EPI_ISL_730479,EPI_ISL_730523,EPI_ISL_730530,EPI_ISL_730534,EPI_ISL_730543,EPI_ISL_730545,EPI_ISL_730546,EPI_ISL_755127,EPI_ISL_755129,EPI_ISL_755145,EPI_ISL_755267,EPI_ISL_878516,EPI_ISL_878571,EPI_ISL_878574,EPI_ISL_878576 | Biolab Diagnostic Laboratories                                                        | Andersen lab at Scripps Research                                                                                       | Issa Abu-Dayyeh et al           |
| EPI_ISL_526988,EPI_ISL_526985,EPI_ISL_526990,EPI_ISL_527002                                                                                                                                                                                                                                                                                                                                                                                                       | Biological prevention, army                                                           | Biological prevention, army                                                                                            | Seadawy et al                   |
| EPI_ISL_907080                                                                                                                                                                                                                                                                                                                                                                                                                                                    | Biology, MCL                                                                          | Biology, MCL                                                                                                           | Seadawy et al                   |
| EPI_ISL_985084,EPI_ISL_985091,EPI_ISL_985096,EPI_ISL_985098                                                                                                                                                                                                                                                                                                                                                                                                       | Biorepository and Clinical Virology Laboratory                                        | Ozer Lab                                                                                                               | Ramon Lorenzo-Redondo et al     |
| EPI_ISL_1145181                                                                                                                                                                                                                                                                                                                                                                                                                                                   | Bioscientia Labor Wermsdorf                                                           | Robert Koch Institute                                                                                                  | et al                           |
| EPI_ISL_747238                                                                                                                                                                                                                                                                                                                                                                                                                                                    | Bogor Public Health                                                                   | West Java Health Laboratory; School of Life Sciences and Technology, Institut Teknologi Bandung                        | Azzania Fibriani et al          |
| EPI_ISL_871872,EPI_ISL_935040,EPI_ISL_935042,EPI_ISL_935045,EPI_ISL_933724,EPI_ISL_962886,EPI_ISL_965277,EPI_ISL_1287349,EPI_ISL_1296316,EPI_ISL_1287760                                                                                                                                                                                                                                                                                                          | Botswana Harvard HIV Reference Laboratory                                             | Botswana Harvard HIV Reference Laboratory                                                                              | Sikhulile Moyo et al            |
| EPI_ISL_859563,EPI_ISL_859601,EPI_ISL_859622,EPI_ISL_859629,EPI_ISL_859657,EPI_ISL_859769,EPI_ISL_859792,EPI_ISL_859819,EPI_ISL_859852,EPI_ISL_859878,EPI_ISL_859996,EPI_ISL_860021,EPI_ISL_860028,EPI_ISL_860067,EPI_ISL_860084                                                                                                                                                                                                                                  | BTC, Khalifa University                                                               | BTC, Khalifa University                                                                                                | Al Safar et al et al            |
| EPI_ISL_1001001,EPI_ISL_1001002,EPI_ISL_1001003,EPI_ISL_1034755,EPI_ISL_1034756,EPI_ISL_1034757,EPI_ISL_1034758,EPI_ISL_1034759,EPI_ISL_1046791,EPI_ISL_1046792,EPI_ISL_1046793                                                                                                                                                                                                                                                                                   | Bundeswehr Institute of Microbiology                                                  | Bundeswehr Institute of Microbiology                                                                                   | Markus Antwerpen et al          |

|                                                                                                                                        |                                                                                                         |                                                                                                                                                                |                                                                   |
|----------------------------------------------------------------------------------------------------------------------------------------|---------------------------------------------------------------------------------------------------------|----------------------------------------------------------------------------------------------------------------------------------------------------------------|-------------------------------------------------------------------|
| EPI_ISL_833336                                                                                                                         | Bureau of Quarantine                                                                                    | Research Institute for Tropical Medicine                                                                                                                       | Hannah Leah Morito et al                                          |
| EPI_ISL_1135056                                                                                                                        | C.H. PRINCESSE GRACE                                                                                    | CNR Virus des Infections Respiratoires - France SUD                                                                                                            | Antonin Bal et al                                                 |
| EPI_ISL_935793                                                                                                                         | Cadham Provincial laboratory                                                                            | National Microbiology Laboratory (NML)                                                                                                                         | Anna Majer et al                                                  |
| EPI_ISL_755016                                                                                                                         | California Department of Public Health                                                                  | California Department of Public Health                                                                                                                         | CDPH IDLB COVIDNet et al                                          |
| EPI_ISL_410044                                                                                                                         | California Department of Public Health                                                                  | Pathogen Discovery, Respiratory Viruses Branch, Division of Viral Diseases, Centers for Disease Control and Prevention                                         | Jing Zhang et al                                                  |
| EPI_ISL_1096139,EPI_ISL_1098603,EPI_ISL_1098604,EPI_ISL_1098605                                                                        | Cambodian National Public Health Laboratory, National Institute of Public Health                        | Virology Unit, Institut Pasteur du Cambodge                                                                                                                    | Sokhoun Yann et al                                                |
| EPI_ISL_576371,EPI_ISL_857327,EPI_ISL_857326,EPI_ISL_857323,EPI_ISL_857335,EPI_ISL_890221,EPI_ISL_890205,EPI_ISL_890215,EPI_ISL_907098 | Cancer Biology Department, National Cancer Institute                                                    | Cancer Biology Department, National Cancer Institute                                                                                                           | Zekri et al                                                       |
| EPI_ISL_548138,EPI_ISL_548139,EPI_ISL_579479,EPI_ISL_579490,EPI_ISL_579496,EPI_ISL_622789,EPI_ISL_622791,EPI_ISL_755619                | Canterbury Health Laboratories                                                                          | Institute of Environmental Science and Research (ESR)                                                                                                          | Xiaoyun Ren et al                                                 |
| EPI_ISL_977539,EPI_ISL_977538,EPI_ISL_977584,EPI_ISL_977594,EPI_ISL_977583,EPI_ISL_977581                                              | Caribbean Public Health Agency                                                                          | Carrington Lab, Department of PreClinical Sciences                                                                                                             | Nikita S. D. Sahadeo et al                                        |
| EPI_ISL_977659,EPI_ISL_977658,EPI_ISL_977656,EPI_ISL_977655                                                                            | Caribbean Public Health Agency                                                                          | Carrington Lab, Department of PreClinical Sciences, Building 36, First Floor Biochemistry Unit, Faculty of Medical Sciences, The University of the West Indies | Nikita S. D. Sahadeo et al                                        |
| EPI_ISL_872196,EPI_ISL_872194                                                                                                          | Caribbean Public Health Agency                                                                          | Carrington Lab, Department of PreClinical Sciences, Faculty of Medical Sciences, The University of the West Indies                                             | Nikita S. D. Sahadeo et al                                        |
| EPI_ISL_872193                                                                                                                         | Caribbean Public Health Agency                                                                          | Carrington Lab, Department of Building 36, First Floor Biochemistry Unit, Faculty of Medical Sciences, The University of the West Indies                       | Nikita S. D. Sahadeo et al                                        |
| EPI_ISL_1060885,EPI_ISL_1060901,EPI_ISL_1060958                                                                                        | CDL Laboratorio Santos e Vidal LTDA.                                                                    | Instituto de Medicina Tropical de Sao Paulo                                                                                                                    | Brazil-UK Centre for Arbovirus Discovery Diagnosis Genomics et al |
| EPI_ISL_1220348                                                                                                                        | CDP PIERRE OUDOT                                                                                        | CNR Virus des Infections Respiratoires - France SUD                                                                                                            | Antonin Bal et al                                                 |
| EPI_ISL_1122433,EPI_ISL_1122443,EPI_ISL_1122446,EPI_ISL_1122452,EPI_ISL_1213539,EPI_ISL_1213552,EPI_ISL_1213556                        | Cebu TB Reference Laboratory                                                                            | Philippine Genome Center                                                                                                                                       | Francis A. Tablizo et al                                          |
| EPI_ISL_971451                                                                                                                         | Cell culture Unit at CV-MIT belonging to HIMMV                                                          | Functional Genomic Platform UATRS-biology, CNRST                                                                                                               | Nadia Touil et al                                                 |
| EPI_ISL_459864                                                                                                                         | Center for Genome Regulation (CRG)                                                                      | Center for Mathematical Modeling and Center for Genome Regulation. Santiago, Chile                                                                             | Gaete A et al                                                     |
| EPI_ISL_522446,EPI_ISL_522448,EPI_ISL_522451,EPI_ISL_522457,EPI_ISL_522459,EPI_ISL_522463,EPI_ISL_522467                               | Center for Laboratory Control of Infectious Diseases, Korea Centers for Diseases Control and Prevention | Center for Laboratory Control of Infectious Diseases, Korea Centers for Diseases Control and Prevention                                                        | Junyoung Kim et al                                                |
| EPI_ISL_493137                                                                                                                         | Center for Research and Innovation, Faculty of Medical Technology, Mahidol University                   | Center for Research and Innovation, Faculty of Medical Technology, Mahidol University                                                                          | Kantima Sangsiriwut et al                                         |
| EPI_ISL_913082                                                                                                                         | Center for Virology                                                                                     | Center for Virology                                                                                                                                            | Jeremy V. Campbell et al                                          |
| EPI_ISL_475807,EPI_ISL_583708                                                                                                          | Center for Virology, Medical University of Vienna                                                       | Bergthaler laboratory, CeMM Research Center for Molecular Medicine of the Austrian Academy of Sciences                                                         | Alexandra Popa et al                                              |
| EPI_ISL_853891                                                                                                                         | Center for Virology, Medical University of Vienna                                                       | Bergthaler laboratory, CeMM Research Center for Molecular Medicine of the Austrian Academy of Sciences                                                         | Lukas Endler et al                                                |
| EPI_ISL_1160167                                                                                                                        | Center of Medical Microbiology, Virology, and Hospital Hygiene, University of Duesseldorf               | Center of Medical Microbiology, Virology, and Hospital Hygiene, University of Duesseldorf                                                                      | Maximilian Damagnez et al                                         |
| EPI_ISL_428488                                                                                                                         | Centers for Disease Control, R.O.C. (Taiwan)                                                            | Centers for Disease Control, R.O.C. (Taiwan)                                                                                                                   | Ji-Rong Yang et al                                                |
| EPI_ISL_815257,EPI_ISL_815390,EPI_ISL_815398,EPI_ISL_815255                                                                            | Centogene                                                                                               | Centogene                                                                                                                                                      | Peter Bauer et al                                                 |

|                                                                                                                                                                                                                                                                         |                                                                                                                                                                                                                     |                                                                                                                            |                           |
|-------------------------------------------------------------------------------------------------------------------------------------------------------------------------------------------------------------------------------------------------------------------------|---------------------------------------------------------------------------------------------------------------------------------------------------------------------------------------------------------------------|----------------------------------------------------------------------------------------------------------------------------|---------------------------|
| EPI_ISL_794602                                                                                                                                                                                                                                                          | Central Laboratories, Egyptian Ministry of Health and Population                                                                                                                                                    | Central Laboratories, Egyptian Ministry of Health and Population                                                           | Kayed et al               |
| EPI_ISL_794599,EPI_ISL_794593                                                                                                                                                                                                                                           | Central Laboratories, Egyptian Ministry of Health and Population                                                                                                                                                    | Central Laboratories, Egyptian Ministry of Health and Population                                                           | Roshdy et al              |
| EPI_ISL_943587                                                                                                                                                                                                                                                          | Central Laboratory of Public Health of Rio Grande do Sul (Lacen-RS)                                                                                                                                                 | State Center for Health Surveillance of the Health Department of the State of Rio Grande do Sul (CEVS/SES-RS)              | Aline Campos et al        |
| EPI_ISL_794606,EPI_ISL_794608                                                                                                                                                                                                                                           | Central Public Health Laboratories, Egyptian Ministry of Health and Population                                                                                                                                      | Central Public Health Laboratories, Egyptian Ministry of Health and Population                                             | El-Shesheny et al         |
| EPI_ISL_885143                                                                                                                                                                                                                                                          | Central public health laboratory                                                                                                                                                                                    | Molecular Diagnostics Department, Central public health laboratory                                                         | Dler et al                |
| EPI_ISL_693471,EPI_ISL_693472,EPI_ISL_693474,EPI_ISL_693475,EPI_ISL_693476,EPI_ISL_693478,EPI_ISL_693479,EPI_ISL_693480,EPI_ISL_693481,EPI_ISL_693482,EPI_ISL_693483                                                                                                    | Central Public Health Laboratory                                                                                                                                                                                    | National Public Health Laboratory, National Centre for Infectious Diseases                                                 | Tze Minn Mak et al        |
| EPI_ISL_978512,EPI_ISL_1068341                                                                                                                                                                                                                                          | Central Public Health Laboratory - LACEN - Bahia, Salvador, Brazil                                                                                                                                                  | Central Public Health Laboratory - LACEN -Bahia, Salvador, Brazil                                                          | Stephane Tosta et al      |
| EPI_ISL_419211                                                                                                                                                                                                                                                          | Central Virology Laboratory                                                                                                                                                                                         | Israel Institute for Biological Research                                                                                   | Inbar Cohen-Gihon et al   |
| EPI_ISL_486437,EPI_ISL_486411,EPI_ISL_501896,EPI_ISL_534201                                                                                                                                                                                                             | Centrālā laboratorija                                                                                                                                                                                               | Latvian Biomedical Research and Study Centre                                                                               | Ivars Silamiķelis et al   |
| EPI_ISL_788934,EPI_ISL_788935                                                                                                                                                                                                                                           | Centre de Recherche et de Formation en Infectiologie Guinée                                                                                                                                                         | TransVIHMI, IRD/INSERM/Monpellier University                                                                               | Alpha Kabinet KEITA et al |
| EPI_ISL_539574,EPI_ISL_539575,EPI_ISL_539576                                                                                                                                                                                                                            | Centre de Recherches Medicales de Lambarene (CERMEL)                                                                                                                                                                | Department of Emerging Infectious Diseases, Institute of Tropical Medicine, Nagasaki University                            | Haruka Abe et al          |
| EPI_ISL_428670,EPI_ISL_428672,EPI_ISL_428671,EPI_ISL_428673,EPI_ISL_525476,EPI_ISL_525478,EPI_ISL_525486,EPI_ISL_525488                                                                                                                                                 | Centre for Dengue Research                                                                                                                                                                                          | Centre for Dengue Research                                                                                                 | Chandima Jeewandara et al |
| EPI_ISL_525474                                                                                                                                                                                                                                                          | Centre for Dengue Research                                                                                                                                                                                          | Centre for Dengue Research, USJ, SL                                                                                        | Chandima Jeewandara et al |
| EPI_ISL_792548,EPI_ISL_792555,EPI_ISL_862725,EPI_ISL_872568,EPI_ISL_978920,EPI_ISL_978922,EPI_ISL_978923,EPI_ISL_978987,EPI_ISL_1233056,EPI_ISL_1233058,EPI_ISL_1233103,EPI_ISL_1233109,EPI_ISL_1233110,EPI_ISL_1233113,EPI_ISL_1233115,EPI_ISL_1233119,EPI_ISL_1233134 | Centre for Dengue Research and AICBU, Department of Immunology and Molecular Medicine                                                                                                                               | Centre for Dengue Research and AICBU, Department of Immunology and Molecular Medicine                                      | Chandima Jeewandara et al |
| EPI_ISL_602574,EPI_ISL_602566,EPI_ISL_602576,EPI_ISL_668451,EPI_ISL_668455,EPI_ISL_668453,EPI_ISL_668449                                                                                                                                                                | Centre for Dengue Research, Department of Immunology and Molecular Medicine                                                                                                                                         | Centre for Dengue Research, Department of Immunology and Molecular Medicine                                                | Chandima Jeewandara et al |
| EPI_ISL_602565                                                                                                                                                                                                                                                          | Centre for Dengue Research, Department of Immunology and Molecular Medicine                                                                                                                                         | Centre for Dengue Research, Department of Immunology and Molecular Medicine,                                               | Chandima Jeewandara et al |
| EPI_ISL_413550                                                                                                                                                                                                                                                          | Centre for Human and Zoonotic Virology (CHAZVY), College of Medicine University of Lagos/Lagos University Teaching Hospital (LUTH), part of the Laboratory Network of the Nigeria Centre for Disease Control (NCDC) | African Centre of Excellence for Genomics of Infectious Diseases (ACEGID), Redeemer's University, Ede, Osun State, Nigeria | Oluniyi P.E. et al        |
| EPI_ISL_654794                                                                                                                                                                                                                                                          | Centre for Human Virology & Genomics, Nigerian Institute of Medical Research                                                                                                                                        | Centre for Human Virology & Genomics, Nigerian Institute of Medical Research                                               | Shaibu et al              |
| EPI_ISL_413596                                                                                                                                                                                                                                                          | Centre for Infectious Diseases and Microbiology - Public Health                                                                                                                                                     | NSW Health Pathology - Institute of Clinical Pathology and Medical Research; Westmead Hospital; University of Sydney       | Rockett R et al           |
| EPI_ISL_407893                                                                                                                                                                                                                                                          | Centre for Infectious Diseases and Microbiology Laboratory Services                                                                                                                                                 | NSW Health Pathology - Institute of Clinical Pathology and Medical Research; Westmead Hospital; University of Sydney       | Eden J-S et al            |

|                                                                                                                                                                                                                                                                               |                                                                                                                                                    |                                                                                                                                                                                                                                                         |                                                                                                                           |
|-------------------------------------------------------------------------------------------------------------------------------------------------------------------------------------------------------------------------------------------------------------------------------|----------------------------------------------------------------------------------------------------------------------------------------------------|---------------------------------------------------------------------------------------------------------------------------------------------------------------------------------------------------------------------------------------------------------|---------------------------------------------------------------------------------------------------------------------------|
| EPI_ISL_413594                                                                                                                                                                                                                                                                | Centre for Infectious Diseases and Microbiology Laboratory Services                                                                                | NSW Health Pathology - Institute of Clinical Pathology and Medical Research; Westmead Hospital; University of Sydney                                                                                                                                    | Rockett R et al                                                                                                           |
| EPI_ISL_427643                                                                                                                                                                                                                                                                | Centre for Infectious Diseases and Microbiology Public Health                                                                                      | NSW Health Pathology - Institute of Clinical Pathology and Medical Research; Westmead Hospital; University of Sydney                                                                                                                                    | Timms V et al                                                                                                             |
| EPI_ISL_414624                                                                                                                                                                                                                                                                | Centre Hospitalier Universitaire de Rouen Laboratoire de Virologie                                                                                 | National Reference Center for Viruses of Respiratory Infections, Institut Pasteur, Paris                                                                                                                                                                | Mélnie Albert et al                                                                                                       |
| EPI_ISL_900573                                                                                                                                                                                                                                                                | Centre Hospitalier de Guéret                                                                                                                       | CNR Virus des Infections Respiratoires - France SUD                                                                                                                                                                                                     | Antonin Bal et al                                                                                                         |
| EPI_ISL_1250627                                                                                                                                                                                                                                                               | Centre Hospitalier de l'Austreberthe                                                                                                               | Centre Hospitalier Universitaire de Rouen Laboratoire de Virologie                                                                                                                                                                                      | Alice Moisan et al                                                                                                        |
| EPI_ISL_508946                                                                                                                                                                                                                                                                | Centre Hospitalier de Macon                                                                                                                        | CNR Virus des Infections Respiratoires - France SUD                                                                                                                                                                                                     | Antonin Bal et al                                                                                                         |
| EPI_ISL_414625                                                                                                                                                                                                                                                                | Centre Hospitalier Régional Universitaire de Nantes Laboratoire de Virologie                                                                       | National Reference Center for Viruses of Respiratory Infections, Institut Pasteur, Paris                                                                                                                                                                | Mélnie Albert et al                                                                                                       |
| EPI_ISL_1299492                                                                                                                                                                                                                                                               | Centre Hospitalo Universitaire Sourou Sanou                                                                                                        | Centre Muraz                                                                                                                                                                                                                                            | Arsène Zongo et al                                                                                                        |
| EPI_ISL_1015374                                                                                                                                                                                                                                                               | Centre Marine La Villeneuve                                                                                                                        | IRBA, 2MI                                                                                                                                                                                                                                               | GORGE O. et al                                                                                                            |
| EPI_ISL_660442                                                                                                                                                                                                                                                                | Centre Muraz                                                                                                                                       | Project group Epidemiology of Highly Pathogenic Microorganisms, Robert Koch Institut                                                                                                                                                                    | Soumeya Ouangraoua et al                                                                                                  |
| EPI_ISL_1279266                                                                                                                                                                                                                                                               | Centro de Investigación Biomédica del Noreste (CIBIN)                                                                                              | Instituto Nacional de Enfermedades Respiratorias (INER): Centro de Investigación en Enfermedades Infecciosas (CIENI)                                                                                                                                    | Consorcio Mexicano de Vigilancia Genómica (CoViGen-Mex). Authors (in alphabetical order): Julio Elias Alvarado-Yaah et al |
| EPI_ISL_941130                                                                                                                                                                                                                                                                | Centro de Investigaciones en Microbiología y Biotecnología-UR (CIMBIUR), Facultad de Ciencias Naturales, Universidad del Rosario, Bogotá, Colombia | Centro de Investigaciones en Microbiología y Biotecnología-UR (CIMBIUR), Facultad de Ciencias Naturales, Universidad del Rosario, Bogotá, Colombia Icahn School of Medicine at Mount Sinai, New York, USA                                               | Nathalia Ballesteros et al                                                                                                |
| EPI_ISL_941944,EPI_ISL_941945,EPI_ISL_941947,EPI_ISL_941995                                                                                                                                                                                                                   | Centro de Investigaciones en Microbiología y Biotecnología-UR (CIMBIUR), Facultad de Ciencias Naturales, Universidad del Rosario, Bogotá, Colombia | Centro de Investigaciones en Microbiología y Biotecnología-UR (CIMBIUR), Facultad de Ciencias Naturales, Universidad del Rosario, Bogotá, Colombia Instituto Nacional de Salud, Bogotá, Colombia Icahn School of Medicine at Mount Sinai, New York, USA | Luz Helena Patiño et al                                                                                                   |
| EPI_ISL_527819,EPI_ISL_697797                                                                                                                                                                                                                                                 | Centro de Investigaciones, Universidad de Especialidades Espíritu Santo                                                                            | Institute of Microbiology, Universidad San Francisco de Quito                                                                                                                                                                                           | Derly Andrade et al                                                                                                       |
| EPI_ISL_837550,EPI_ISL_837554,EPI_ISL_837555,EPI_ISL_837556,EPI_ISL_837557,EPI_ISL_837558,EPI_ISL_837559,EPI_ISL_837560,EPI_ISL_837561,EPI_ISL_837562,EPI_ISL_837566,EPI_ISL_837567,EPI_ISL_837568,EPI_ISL_837571,EPI_ISL_837572,EPI_ISL_837574,EPI_ISL_837575,EPI_ISL_837576 | Centro Nacional de Enfermedades Tropicales (CENETROP)                                                                                              | Laboratory of Respiratory Viruses and Measles, Oswaldo Cruz Institute, FIOCRUZ                                                                                                                                                                          | Paola Resende et al                                                                                                       |
| EPI_ISL_512670,EPI_ISL_527755                                                                                                                                                                                                                                                 | Centro Nacional De Rehabilitacion Humberto Araya Rojas (Cenare)                                                                                    | Inciensa, Instituto Costarricense de Investigación y Enseñanza en Nutrición y Salud                                                                                                                                                                     | Francisco Duarte et al                                                                                                    |
| EPI_ISL_1239537                                                                                                                                                                                                                                                               | Centrum Medycyny Klinicznej i Estetycznej DiMedical Sp. z o.o.                                                                                     | 1. National Institute of Public Health - National Institute of Hygiene; 2. Eurofins Genomics Europe Sequencing GmbH                                                                                                                                     | Wołkowicz Tomasz et al                                                                                                    |
| EPI_ISL_751184                                                                                                                                                                                                                                                                | CENUR Litoral Norte – UdelaR, Salto, Uruguay                                                                                                       | Institut Pasteur de Montevideo                                                                                                                                                                                                                          | Daiana Mir et al                                                                                                          |
| EPI_ISL_1229000                                                                                                                                                                                                                                                               | Cerballiance                                                                                                                                       | CNR Virus des Infections Respiratoires - France SUD                                                                                                                                                                                                     | Antonin Bal et al                                                                                                         |
| EPI_ISL_1265787,EPI_ISL_1265789                                                                                                                                                                                                                                               | CH BASTIA                                                                                                                                          | CNR Virus des Infections Respiratoires - France SUD                                                                                                                                                                                                     | Antonin Bal et al                                                                                                         |
| EPI_ISL_1013406                                                                                                                                                                                                                                                               | CH de Mayotte                                                                                                                                      | National Reference Center for Viruses of Respiratory Infections, Institut Pasteur, Paris                                                                                                                                                                | Marion Barbet et al                                                                                                       |
| EPI_ISL_860901                                                                                                                                                                                                                                                                | CH du MANS - Lab. Bio. Moléculaire                                                                                                                 | National Reference Center for Viruses of Respiratory Infections, Institut Pasteur, Paris                                                                                                                                                                | Marion Barbet et al                                                                                                       |
| EPI_ISL_416493                                                                                                                                                                                                                                                                | CH Jean de Navarre Laboratoire de Biologie                                                                                                         | National Reference Center for Viruses of Respiratory Infections, Institut Pasteur, Paris                                                                                                                                                                | Mélnie Albert et al                                                                                                       |
| EPI_ISL_1209382                                                                                                                                                                                                                                                               | CH ROUBAIX                                                                                                                                         | CHU Lille - Laboratoire de Virologie                                                                                                                                                                                                                    | AIT YAHYA Emilie et al                                                                                                    |
| EPI_ISL_1228999                                                                                                                                                                                                                                                               | CH ROYAN                                                                                                                                           | CNR Virus des Infections Respiratoires - France SUD                                                                                                                                                                                                     | Antonin Bal et al                                                                                                         |

|                                                                                                                                                                                                    |                                                                                                              |                                                                                                                                            |                                 |
|----------------------------------------------------------------------------------------------------------------------------------------------------------------------------------------------------|--------------------------------------------------------------------------------------------------------------|--------------------------------------------------------------------------------------------------------------------------------------------|---------------------------------|
| EPI_ISL_802995                                                                                                                                                                                     | Charité Universitätsmedizin Berlin, Institut für Virologie, Charitéplatz 1, 10117 Berlin, Germany            | Charité Universitätsmedizin Berlin, Institut für Virologie, Charitéplatz 1, 10117 Berlin, Germany                                          | Victor M Corman et al           |
| EPI_ISL_1164535,EPI_ISL_729475                                                                                                                                                                     | Charité Universitätsmedizin Berlin, Institut für Virologie/Labor Berlin                                      | Charité Universitätsmedizin Berlin, Institut für Virologie                                                                                 | Victor M Corman et al           |
| EPI_ISL_406862                                                                                                                                                                                     | Charité Universitätsmedizin Berlin, Institute of Virology; Institut für Mikrobiologie der Bundeswehr, Munich | Charité Universitätsmedizin Berlin, Institute of Virology                                                                                  | Victor M Corman et al           |
| EPI_ISL_1239284                                                                                                                                                                                    | Charlotte Maxeke Johannesburg Academic Hospital, National Health Laboratory Services, Gauteng, South Africa  | National Institute for Communicable Diseases of the National Health Laboratory Service                                                     | Amoako DG et al                 |
| EPI_ISL_1085538                                                                                                                                                                                    | CHI VILLENEUVE ST GEORGES                                                                                    | Department of Virology, Henri Mondor University Hospital, Assistance Publique Hôpitaux de Paris, Université Paris-Est Créteil, INSERM U955 | Christophe Rodriguez et al      |
| EPI_ISL_419310,EPI_ISL_901719                                                                                                                                                                      | Chiba Prefectural Institute of Public Health                                                                 | Pathogen Genomics Center, National Institute of Infectious Diseases                                                                        | Tsuyoshi Sekizuka et al         |
| EPI_ISL_492028,EPI_ISL_625457,EPI_ISL_625458,EPI_ISL_625472,EPI_ISL_700328,EPI_ISL_700329,EPI_ISL_700331,EPI_ISL_700337,EPI_ISL_700338,EPI_ISL_700342,EPI_ISL_768731,EPI_ISL_906083,EPI_ISL_906092 | Child Health Research Foundation                                                                             | Child Health Research Foundation                                                                                                           | Senjuti Saha et al              |
| EPI_ISL_1190785                                                                                                                                                                                    | CHR LA REUNION FELIX GUYON                                                                                   | CNR Virus des Infections Respiratoires - France SUD                                                                                        | Antonin Bal et al               |
| EPI_ISL_1085370                                                                                                                                                                                    | CHR METZ THIONVILLE Hôpital de Mercy                                                                         | Department of Virology, Henri Mondor University Hospital, Assistance Publique Hôpitaux de Paris, Université Paris-Est Créteil, INSERM U955 | Christophe Rodriguez et al      |
| EPI_ISL_1013408,EPI_ISL_1013409,EPI_ISL_1013410                                                                                                                                                    | CHU - Hôpital Cavale Blanche                                                                                 | National Reference Center for Viruses of Respiratory Infections, Institut Pasteur, Paris                                                   | Marion Barbet et al             |
| EPI_ISL_779838,EPI_ISL_779844                                                                                                                                                                      | CHU Bordeaux                                                                                                 | CNR Virus des Infections Respiratoires - France SUD                                                                                        | Antonin Bal et al               |
| EPI_ISL_644680,EPI_ISL_663214,EPI_ISL_666714                                                                                                                                                       | CHU de Limoges                                                                                               | CNR Virus des Infections Respiratoires - France SUD                                                                                        | Antonin Bal et al               |
| EPI_ISL_644681,EPI_ISL_660693,EPI_ISL_660709                                                                                                                                                       | CHU Montpellier                                                                                              | CNR Virus des Infections Respiratoires - France SUD                                                                                        | Antonin Bal et al               |
| EPI_ISL_663237,EPI_ISL_663242,EPI_ISL_900531                                                                                                                                                       | CHU Poitiers                                                                                                 | CNR Virus des Infections Respiratoires - France SUD                                                                                        | Antonin Bal et al               |
| EPI_ISL_1292807,EPI_ISL_1292808                                                                                                                                                                    | CHU Pontchaillou                                                                                             | CHU Pontchaillou                                                                                                                           | GROLHIER Claire et al           |
| EPI_ISL_593874,EPI_ISL_671967,EPI_ISL_754137                                                                                                                                                       | CHU Purpan - Laboratoire de Virologie - Institut Fédératif de Biologie                                       | CHU Purpan - Laboratoire de Virologie - Institut Fédératif de Biologie                                                                     | Latour J. et al                 |
| EPI_ISL_482888                                                                                                                                                                                     | CHU Purpan - Laboratoire de Virologie - Institut Fédératif de Biologie                                       | Laboratoire de virologie - École Nationale Vétérinaire de Toulouse                                                                         | Guillaume Croville et al        |
| EPI_ISL_660671                                                                                                                                                                                     | CHU Toulouse                                                                                                 | CNR Virus des Infections Respiratoires - France SUD                                                                                        | Antonin Bal et al               |
| EPI_ISL_735391                                                                                                                                                                                     | CHU Tours                                                                                                    | CNR Virus des Infections Respiratoires - France SUD                                                                                        | Antonin Bal et al               |
| EPI_ISL_1265619                                                                                                                                                                                    | CHUGA-IBP-laboratoire de Virologie                                                                           | IBP-laboratoire de virologie                                                                                                               | Sylvie Larrat et al             |
| EPI_ISL_745260                                                                                                                                                                                     | CHUM-Site Glen-LAB Microbiologie                                                                             | Laboratoire de santé publique du Québec                                                                                                    | Sandrine Moreira et al          |
| EPI_ISL_1299248                                                                                                                                                                                    | CHWAPI - SITE NOTRE DAME                                                                                     | Institut de Pathologie et Genetique (IPG)                                                                                                  | Pascale Hilbert et al           |
| EPI_ISL_683835                                                                                                                                                                                     | CICM                                                                                                         | Malaria Research and Training Center (MRTC-Parasito)                                                                                       | Antoine Dara et al              |
| EPI_ISL_487448,EPI_ISL_487453,EPI_ISL_487455,EPI_ISL_487457,EPI_ISL_487459,EPI_ISL_487460,EPI_ISL_487462,EPI_ISL_487464                                                                            | CICM-Mali                                                                                                    | Bundeswehr Institut of Microbiology                                                                                                        | Kouriba et al                   |
| EPI_ISL_1278404,EPI_ISL_1278453,EPI_ISL_1278520,EPI_ISL_1278521,EPI_ISL_1278522,EPI_ISL_1278535,EPI_ISL_1278849                                                                                    | Clalit Health Services Laboratories, Israel                                                                  | Stern Lab                                                                                                                                  | Stern Lab et al                 |
| EPI_ISL_1250842,EPI_ISL_1278275,EPI_ISL_1278276                                                                                                                                                    | Clin & Gen Lab                                                                                               | Molecular Genetics Laboratory, Instituto de Investigaciones Químicas, Universidad Mayor de San Andrés                                      | Oscar M. Rollano-Peñaloza et al |
| EPI_ISL_462464,EPI_ISL_462470                                                                                                                                                                      | Clinical Center, University of Sarajevo                                                                      | Charite Universitätsmedizin Berlin, Institute of Virology                                                                                  | Victor M Corman et al           |
| EPI_ISL_1300657                                                                                                                                                                                    | Clinical Center, University of Sarajevo; Unit for Clinical Microbiology                                      | Clinical Center, University of Sarajevo; Unit for Clinical Microbiology                                                                    | Irma Salimović-Bešić et al      |

|                                                                                                                                                       |                                                                                                                            |                                                                                                                                            |                                                                   |
|-------------------------------------------------------------------------------------------------------------------------------------------------------|----------------------------------------------------------------------------------------------------------------------------|--------------------------------------------------------------------------------------------------------------------------------------------|-------------------------------------------------------------------|
| EPI_ISL_747194,EPI_ISL_1122422,EPI_ISL_1122423                                                                                                        | Clinical Microbiology Laboratory, Faculty of Medicine, Universitas Indonesia                                               | Clinical Microbiology Laboratory, Faculty of Medicine, Universitas Indonesia                                                               | Fera Ibrahim et al                                                |
| EPI_ISL_1196798,EPI_ISL_1196795                                                                                                                       | Clinical Microbiology Laboratory, Faculty of Medicine, Universitas Indonesia                                               | Faculty of Medicine, Universitas Indonesia                                                                                                 | Fadilah et al                                                     |
| EPI_ISL_447428,EPI_ISL_447446                                                                                                                         | Clinical Microbiology Laboratory, Sheba Medical Center                                                                     | Stern Lab                                                                                                                                  | Stern Lab et al                                                   |
| EPI_ISL_447317,EPI_ISL_447325                                                                                                                         | Clinical Virology Laboratory, Soroka Medical Center and the Faculty of Health Sciences, Ben-Gurion University of the Negev | Stern Lab                                                                                                                                  | Stern Lab et al                                                   |
| EPI_ISL_1299497                                                                                                                                       | CMA Dano                                                                                                                   | Centre Muraz                                                                                                                               | Arsène Zongo et al                                                |
| EPI_ISL_640001,EPI_ISL_640003,EPI_ISL_640009,EPI_ISL_683337,EPI_ISL_683391,EPI_ISL_683396,EPI_ISL_692757,EPI_ISL_730646,EPI_ISL_745375                | CNR Virus des Infections Respiratoires - France SUD                                                                        | CNR Virus des Infections Respiratoires - France SUD                                                                                        | Antonin Bal et al                                                 |
| EPI_ISL_410486                                                                                                                                        | CNR Virus des Infections Respiratoires - France SUD                                                                        | CNR Virus des Infections Respiratoires - France SUD                                                                                        | Bal et al                                                         |
| EPI_ISL_632903                                                                                                                                        | Communicable Disease Laboratory, Public Health Directorate                                                                 | Communicable Disease Laboratory, Public Health Directorate                                                                                 | AlAbbas et al                                                     |
| EPI_ISL_681309,EPI_ISL_681301,EPI_ISL_681312,EPI_ISL_682303,EPI_ISL_682304,EPI_ISL_682305,EPI_ISL_682315,EPI_ISL_682316,EPI_ISL_682312,EPI_ISL_684035 | Communicable Disease Laboratory, Public Health Directorate                                                                 | Communicable Disease Laboratory, Public Health Directorate                                                                                 | Alwasti et al                                                     |
| EPI_ISL_632255,EPI_ISL_632261,EPI_ISL_632283,EPI_ISL_632284,EPI_ISL_632262,EPI_ISL_632267,EPI_ISL_632263,EPI_ISL_632285                               | Communicable Disease Laboratory, Public Health Directorate                                                                 | Communicable Disease Laboratory, Public Health Directorate                                                                                 | AlWasti et al                                                     |
| EPI_ISL_510531                                                                                                                                        | Communicable Disease Laboratory, Public Health Directorate                                                                 | Communicable Disease Laboratory, Public Health Directorate                                                                                 | Shehab et al                                                      |
| EPI_ISL_729778                                                                                                                                        | Connecticut Department of Health                                                                                           | Grubaugh Lab - Yale School of Public Health                                                                                                | Joseph Fauver et al                                               |
| EPI_ISL_1040819,EPI_ISL_1040820,EPI_ISL_1040821                                                                                                       | CoVid WC Cape Town Metro                                                                                                   | NHLS/UCT                                                                                                                                   | Arash Iranzadeh et al                                             |
| EPI_ISL_847827                                                                                                                                        | COVID-19 National Reference Laboratory                                                                                     | COVID-19 National Reference Laboratory                                                                                                     | Tahmineh Jalali et al                                             |
| EPI_ISL_1190754,EPI_ISL_1190757,EPI_ISL_1190758,EPI_ISL_1190763,EPI_ISL_1190764,EPI_ISL_1190765,EPI_ISL_1190767,EPI_ISL_1190768                       | CREMER(Centre de Recherches sur les Maladies Emergentes et Ré-émergentes)                                                  | TransVIHMI(Recherches Translationnelles sur le VIH et les Maladies Infectieuses)                                                           | Celestin Godwe et al                                              |
| EPI_ISL_1085405                                                                                                                                       | CRICQUEBOEUF Cerballiance Normandie                                                                                        | Department of Virology, Henri Mondor University Hospital, Assistance Publique Hôpitaux de Paris, Université Paris-Est Créteil, INSERM U955 | Christophe Rodriguez et al                                        |
| EPI_ISL_1195673                                                                                                                                       | Croatian Institute of Public Health                                                                                        | Croatian Institute of Public Health                                                                                                        | Irena Tabain et al                                                |
| EPI_ISL_528850                                                                                                                                        | CSIR-Centre for Cellular and Molecular Biology                                                                             | CSIR-Centre for Cellular and Molecular Biology                                                                                             | Lamuk Zaveri et al                                                |
| EPI_ISL_910199,EPI_ISL_910242,EPI_ISL_910248,EPI_ISL_910258,EPI_ISL_910276,EPI_ISL_910278,EPI_ISL_910281                                              | CSIR-Centre for Cellular and Molecular Biology                                                                             | CSIR-Centre for Cellular and Molecular Biology                                                                                             | Payel Mukherjee et al                                             |
| EPI_ISL_661304,EPI_ISL_661309                                                                                                                         | CSIR-Indian Institute of Chemical Biology, MEDICA Supercpecialty Hospital Kolkata                                          | CSIR-Indian Institute of Chemical Biology, MEDICA Supercpecialty Hospital Kolkata                                                          | Sujay Krishna Maity et al                                         |
| EPI_ISL_416542,EPI_ISL_421652                                                                                                                         | Dasman Diabetes Institute                                                                                                  | Dasman Diabetes Institute                                                                                                                  | Fahd Al-Mulla et al                                               |
| EPI_ISL_1060924                                                                                                                                       | DB Diagnosticos do Brasil                                                                                                  | Instituto de Medicina Tropical de Sao Paulo                                                                                                | Brazil-UK Centre for Arbovirus Discovery Diagnosis Genomics et al |



|                                                             |                                                                                                                                                                                         |                                                                                                                                                                                                 |                                                                   |
|-------------------------------------------------------------|-----------------------------------------------------------------------------------------------------------------------------------------------------------------------------------------|-------------------------------------------------------------------------------------------------------------------------------------------------------------------------------------------------|-------------------------------------------------------------------|
| EPI_ISL_722144                                              | DB Diagnosticos do Brasil                                                                                                                                                               | Laboratório de Parasitologia Médica - Instituto de Medicina Tropical - Universidade de São Paulo                                                                                                | Brazil-UK Centre for Arbovirus Discovery Diagnosis Genomics et al |
| EPI_ISL_804826                                              | DB Diagnosticos do Brasil                                                                                                                                                               | Laboratório de Parasitologia Médica - Instituto de Medicina Tropical - Universidade de São Paulo                                                                                                | Nuno Faria et al                                                  |
| EPI_ISL_476195,EPI_ISL_476279,EPI_ISL_476328                | DB Diagnósticos do Brasil                                                                                                                                                               | Instituto de Medicina Tropical da Universidade de São Paulo                                                                                                                                     | Samples: Nelson Gaburo Jr et al                                   |
| EPI_ISL_828182,EPI_ISL_827757,EPI_ISL_829158,EPI_ISL_829968 | deCODE genetics                                                                                                                                                                         | deCODE genetics                                                                                                                                                                                 | Daniel F Gudbjartsson et al                                       |
| EPI_ISL_833041                                              | Defence Services Medical Research Center, Biological Research Laboratory                                                                                                                | Defence Services Medical Research Center, Biological Research Laboratory                                                                                                                        | Khine Zaw Oo et al                                                |
| EPI_ISL_792301                                              | Departamento de Biología y genética molecular, IACA Laboratorios.                                                                                                                       | Área de Secuenciación del Laboratorio de Virología del Hospital de Niños Dr. Ricardo Gutierrez on behalf of 'Proyecto Argentino Interinstitucional de genómica de SARS-CoV-2' (PAIS Consortium) | Nabaes Jodar et al                                                |
| EPI_ISL_508666                                              | Departamento de Microbiología, CDB, Hospital Clínic, Barcelona                                                                                                                          | SeqCOVID-SPAIN consortium/IBV(CSIC)                                                                                                                                                             | Andrea Vergara et al                                              |
| EPI_ISL_1137609                                             | Département de Maladies Infectieuses, CHU Farhat Hached Sousse, Tunisie                                                                                                                 | Laboratoire des Procédés de Criblage Moléculaire et Cellulaire-Centre de Biotechnologie de Sfax                                                                                                 | Souissi et al                                                     |
| EPI_ISL_516922,EPI_ISL_516923,EPI_ISL_516925                | Department for Molecular Diagnostics, Centre for Medical Microbiology, Institute of Public Health of Montenegro                                                                         | Charité Universitätsmedizin Berlin, Institut für Virologie                                                                                                                                      | Victor M Corman et al                                             |
| EPI_ISL_1013596,EPI_ISL_1013610                             | Department for Molecular Diagnostics, Centre for Medical Microbiology, Institute of Public Health, Montenegro                                                                           | Charité Universitätsmedizin Berlin, Institut für Virologie                                                                                                                                      | Victor M Corman et al                                             |
| EPI_ISL_481380                                              | Department for Virology, Molecular Biology and Genome Research, R. G. Lugar Center for Public Health Research, National Center for Disease Control and Public Health (NCDC) of Georgia. | Department for Virology, Molecular Biology and Genome Research, R. G. Lugar Center for Public Health Research, National Center for Disease Control and Public Health (NCDC) of Georgia.         | Ana Papkauri et al                                                |
| EPI_ISL_470876,EPI_ISL_763062                               | Department for Virology, Molecular Biology and Genome Research, R. G. Lugar Center for Public Health Research, National Center for Disease Control and Public Health (NCDC) of Georgia. | Department for Virology, Molecular Biology and Genome Research, R. G. Lugar Center for Public Health Research, National Center for Disease Control and Public Health (NCDC) of Georgia.         | Giorgi Tomashvili et al                                           |
| EPI_ISL_447056,EPI_ISL_470877,EPI_ISL_1048367               | Department for Virology, Molecular Biology and Genome Research, R. G. Lugar Center for Public Health Research, National Center for Disease Control and Public Health (NCDC) of Georgia. | Department for Virology, Molecular Biology and Genome Research, R. G. Lugar Center for Public Health Research, National Center for Disease Control and Public Health (NCDC) of Georgia.         | Gvantsa Brachveli et al                                           |
| EPI_ISL_420144                                              | Department for Virology, Molecular Biology and Genome Research, R. G. Lugar Center for Public Health Research, National Center for Disease Control and Public Health (NCDC) of Georgia. | Department for Virology, Molecular Biology and Genome Research, R. G. Lugar Center for Public Health Research, National Center for Disease Control and Public Health (NCDC) of Georgia.         | Gvantsa Chanturia et al                                           |
| EPI_ISL_447055,EPI_ISL_471529,EPI_ISL_754181                | Department for Virology, Molecular Biology and Genome Research, R. G. Lugar Center for Public Health Research, National Center for Disease Control and Public Health (NCDC) of Georgia. | Department for Virology, Molecular Biology and Genome Research, R. G. Lugar Center for Public Health Research, National Center for Disease Control and Public Health (NCDC) of Georgia.         | Meri Pantsulaia et al                                             |
| EPI_ISL_420140                                              | Department for Virology, Molecular Biology and Genome Research, R. G. Lugar Center for Public Health Research, National Center for Disease Control and Public Health (NCDC) of Georgia. | Department for Virology, Molecular Biology and Genome Research, R. G. Lugar Center for Public Health Research, National Center for Disease Control and Public Health (NCDC) of Georgia.         | Nato Kotaria et al                                                |
| EPI_ISL_754180                                              | Department for Virology, Molecular Biology and Genome Research, R. G. Lugar Center for Public Health Research, National Center for Disease Control and Public Health (NCDC) of Georgia. | Department for Virology, Molecular Biology and Genome Research, R. G. Lugar Center for Public Health Research, National Center for Disease Control and Public Health (NCDC) of Georgia.         | Salome Javashvili et al                                           |
| EPI_ISL_477169                                              | Department for Virology, Molecular Biology and Genome Research, R. G. Lugar Center for Public Health Research, National Center for Disease Control and Public Health (NCDC) of Georgia. | Department for Virology, Molecular Biology and Genome Research, R. G. Lugar Center for Public Health Research, National Center for Disease Control and Public Health (NCDC) of Georgia.         | Tata Imnadze et al                                                |

|                                                                                                                                                                                 |                                                                                                                                                     |                                                                                                                                                     |                               |
|---------------------------------------------------------------------------------------------------------------------------------------------------------------------------------|-----------------------------------------------------------------------------------------------------------------------------------------------------|-----------------------------------------------------------------------------------------------------------------------------------------------------|-------------------------------|
| EPI_ISL_515083,EPI_ISL_515084,EPI_ISL_515088,EPI_ISL_515091,EPI_ISL_515094,EPI_ISL_515099,EPI_ISL_515103,EPI_ISL_515110                                                         | Department of Biochemistry, Cell and Molecular Biology                                                                                              | WACCBIP, University of Ghana                                                                                                                        | Ngoi et al                    |
| EPI_ISL_944717,EPI_ISL_944720                                                                                                                                                   | Department of Biochemistry, Cell and Molecular Biology, West African Centre for Cell Biology of Infectious Pathogens (WACCBIP), University of Ghana | Department of Biochemistry, Cell and Molecular Biology, West African Centre for Cell Biology of Infectious Pathogens (WACCBIP), University of Ghana | Morang'a et al                |
| EPI_ISL_884845,EPI_ISL_884843,EPI_ISL_884838,EPI_ISL_884856,EPI_ISL_884841                                                                                                      | Department of Biochemistry, Cell and Molecular Biology, West African Centre for Cell Biology of Infectious Pathogens (WACCBIP), University of Ghana | Department of Biochemistry, Cell and Molecular Biology, West African Centre for Cell Biology of Infectious Pathogens (WACCBIP), University of Ghana | Ngoi et al                    |
| EPI_ISL_907075,EPI_ISL_956332                                                                                                                                                   | Department of Biology, University of Basrah                                                                                                         | Department of Biology, University of Basrah                                                                                                         | Abu-Ali et al                 |
| EPI_ISL_626299,EPI_ISL_424648,EPI_ISL_484707,EPI_ISL_707745,EPI_ISL_707746                                                                                                      | Department of Clinical Microbiology                                                                                                                 | GIGA Medical Genomics                                                                                                                               | Keith Durkin et al            |
| EPI_ISL_419228,EPI_ISL_419227                                                                                                                                                   | Department of Clinical Pathology, Pamela Youde Nethersole Eastern Hospital                                                                          | Department of Health Technology and Informatics, Faculty of Health and Social Science, The Hong Kong Polytechnic University                         | Kenneth Siu-Sing LEUNG et al  |
| EPI_ISL_419242                                                                                                                                                                  | Department of Clinical Pathology, Tuen Mun Hospital                                                                                                 | Department of Health Technology and Informatics, Faculty of Health and Social Science, The Hong Kong Polytechnic University                         | Kenneth Siu-Sing LEUNG et al  |
| EPI_ISL_419231                                                                                                                                                                  | Department of Clinical Pathology, Tuen Mun Hospital, 23 Tsing Chung Koon Road, Tuen Mun, N.T.                                                       | Department of Health Technology and Informatics, Faculty of Health and Social Science, The Hong Kong Polytechnic University                         | Kenneth Siu-Sing LEUNG et al  |
| EPI_ISL_1018120,EPI_ISL_1018121,EPI_ISL_1018258,EPI_ISL_1018285,EPI_ISL_1018304,EPI_ISL_1018317,EPI_ISL_1019640,EPI_ISL_1019707,EPI_ISL_1019710,EPI_ISL_1020103,EPI_ISL_1020214 | Department of Health Technology and Informatics, The Hong Kong Polytechnic University                                                               | Department of Health Technology and Informatics, The Hong Kong Polytechnic University                                                               | Gilman Kit-Hang Siu et al     |
| EPI_ISL_610211                                                                                                                                                                  | Department of Health Technology and Informatics, The Hong Kong Polytechnic University                                                               | Department of Health Technology and Informatics, The Hong Kong Polytechnic University                                                               | Siu et al                     |
| EPI_ISL_417444                                                                                                                                                                  | Department of Healthcare Biotechnology, National University of Sciences and Technology (NUST)                                                       | Department of Healthcare Biotechnology, National University of Sciences and Technology (NUST)                                                       | Javed et al                   |
| EPI_ISL_411220                                                                                                                                                                  | Department of Infectious Disease Prevention and Control, Bichat Claude Bernard Hospital, Paris                                                      | Laboratoire Virpath, CIRI U111, UCBL1, INSERM, CNRS, ENS Lyon                                                                                       | Olivier Terrier et al         |
| EPI_ISL_1255104                                                                                                                                                                 | Department of Infectious Disease Prevention and Control, Henan Provincial Center for Disease Control and Prevention                                 | Department of Infectious Disease Prevention and Control, Henan Provincial Center for Disease Control and Prevention                                 | Li et al                      |
| EPI_ISL_477180                                                                                                                                                                  | Department of Laboratory Medicine Tan Tock Seng Hospital                                                                                            | Department of Laboratory Medicine Tan Tock Seng Hospital                                                                                            | Chen YYC et al                |
| EPI_ISL_934554,EPI_ISL_934569                                                                                                                                                   | Department of Laboratory Medicine, Division of Clinical Virology, University of Medicine, Vienna                                                    | Bergthaler laboratory, CeMM Research Center for Molecular Medicine of the Austrian Academy of Sciences                                              | Lukas Endler et al            |
| EPI_ISL_410218,EPI_ISL_408489,EPI_ISL_447621,EPI_ISL_534336,EPI_ISL_693303,EPI_ISL_693304,EPI_ISL_738065,EPI_ISL_1010728,EPI_ISL_1039160,EPI_ISL_1041957                        | Department of Laboratory Medicine, National Taiwan University Hospital                                                                              | Microbial Genomics Core Lab, National Taiwan University Centers of Genomic and Precision Medicine                                                   | Shiou-Hwei Yeh et al          |
| EPI_ISL_648043,EPI_ISL_648071                                                                                                                                                   | Department of Laboratory Medicine, Tan Tock Seng Hospital                                                                                           | Department of Laboratory Medicine, Tan Tock Seng Hospital                                                                                           | Chen YYC et al                |
| EPI_ISL_977590                                                                                                                                                                  | Department of Medical Microbiology, Hospital Pengajar Universiti Putra Malaysia                                                                     | Malaysia Genome Institute                                                                                                                           | Mohd Noor Mat Isa et al       |
| EPI_ISL_775346                                                                                                                                                                  | Department of medical microbiology, section Aalesund, Aalesund Hospital                                                                             | Norwegian Institute of Public Health, Department of Virology                                                                                        | Kathrine Stene-Johansen et al |
| EPI_ISL_501176,EPI_ISL_501177,EPI_ISL_501185,EPI_ISL_501204,EPI_ISL_501207,EPI_ISL_501220                                                                                       | Department of Medical Microbiology, University Malaya Medical Centre                                                                                | Department of Medical Microbiology, Faculty of Medicine, University of Malaya                                                                       | Yoong Min CHONG et al         |
| EPI_ISL_512844                                                                                                                                                                  | Department of Medical Research                                                                                                                      | DMR_Myanmar                                                                                                                                         | Myat Htut Nyunt et al         |

|                                                                                                                                                                                                                                                                                                                                                                        |                                                                                                                                          |                                                                                                                                                        |                         |
|------------------------------------------------------------------------------------------------------------------------------------------------------------------------------------------------------------------------------------------------------------------------------------------------------------------------------------------------------------------------|------------------------------------------------------------------------------------------------------------------------------------------|--------------------------------------------------------------------------------------------------------------------------------------------------------|-------------------------|
| EPI_ISL_431117                                                                                                                                                                                                                                                                                                                                                         | Department of Microbiology, Gandhi Medical College and Hospital, Secendrabad, Hyderabad, India                                           | Department of Microbiology, Gandhi Medical College and Hospital, Secendrabad, Hyderabad, India                                                         | Thrilok Chander B et al |
| EPI_ISL_1027646,EPI_ISL_1027645,EPI_ISL_1027649                                                                                                                                                                                                                                                                                                                        | Department of Microbiology, National Institute for Public Health of Kosova                                                               | Charité Universitätsmedizin Berlin, Institut für Virologie                                                                                             | Victor M Corman et al   |
| EPI_ISL_498271,EPI_ISL_498270,EPI_ISL_497865,EPI_ISL_497818,EPI_ISL_497805,EPI_ISL_497797,EPI_ISL_497788,EPI_ISL_497823,EPI_ISL_497827,EPI_ISL_1034417,EPI_ISL_1034434,EPI_ISL_1034435,EPI_ISL_1034436,EPI_ISL_1034437,EPI_ISL_1034440,EPI_ISL_1034446,EPI_ISL_1034604,EPI_ISL_1034710,EPI_ISL_1197084,EPI_ISL_1197100,EPI_ISL_1197102,EPI_ISL_1197106,EPI_ISL_1197109 | Department of Microbiology, The University of Hong Kong                                                                                  | Department of Microbiology, The University of Hong Kong                                                                                                | Kelvin K.W. To et al    |
| EPI_ISL_1008286,EPI_ISL_1180897                                                                                                                                                                                                                                                                                                                                        | Department of Microbiology, University Innsbruck                                                                                         | Bergthaler laboratory, CeMM Research Center for Molecular Medicine of the Austrian Academy of Sciences                                                 | Lukas Endler et al      |
| EPI_ISL_463741,EPI_ISL_1164627,EPI_ISL_1164630,EPI_ISL_1164631,EPI_ISL_1164639,EPI_ISL_1164641,EPI_ISL_1164643,EPI_ISL_1164647,EPI_ISL_1164653,EPI_ISL_1164670,EPI_ISL_1164688,EPI_ISL_1164702,EPI_ISL_1164733,EPI_ISL_1164734                                                                                                                                         | Department of Molecular Virology, Cyprus Institute of Neurology and Genetics                                                             | Department of Molecular Virology, Cyprus Institute of Neurology and Genetics                                                                           | Jan Richter et al       |
| EPI_ISL_853819                                                                                                                                                                                                                                                                                                                                                         | Department of Pathology, Landeskrankenhaus Graz II, Medical University Graz                                                              | Bergthaler laboratory, CeMM Research Center for Molecular Medicine of the Austrian Academy of Sciences                                                 | Lukas Endler et al      |
| EPI_ISL_594185,EPI_ISL_594186,EPI_ISL_594187,EPI_ISL_594188,EPI_ISL_596452,EPI_ISL_596451,EPI_ISL_596455                                                                                                                                                                                                                                                               | Department of Pathology, School of Medicine, Imam Khomeini Hospital, Tehran University of Medical Sciences                               | Genetics Research Center, University of Social Welfare and Rehabilitation Sciences                                                                     | Zohreh Fattahi et al    |
| EPI_ISL_582033                                                                                                                                                                                                                                                                                                                                                         | Department of Pathology, School of Medicine, Imam Khomeini Hospital, Tehran University of Medical Sciences                               | Genetics Research Center. University Of Social Welfare And Rehabilitation Sciences                                                                     | Zohreh Fattahi et al    |
| EPI_ISL_425340                                                                                                                                                                                                                                                                                                                                                         | Department of Pathology, University of Cambridge                                                                                         | COVID-19 Genomics UK (COG-UK) Consortium                                                                                                               | Luke W Meredith et al   |
| EPI_ISL_1289914                                                                                                                                                                                                                                                                                                                                                        | Department of Public Health Microbiology Ljubljana, National Laboratory for Health, Environment and Food                                 | Department of Public Health Microbiology Ljubljana, National Laboratory for Health, Environment and Food                                               | José Gonçalves et al    |
| EPI_ISL_576147                                                                                                                                                                                                                                                                                                                                                         | Department of Respiratory & Other Viral Infections of L.V. Gromashevsky Institute of Epidemiology & Infectious Diseases NAMS of Ukraine  | Department of Respiratory & Other Viral Infections of L.V. Gromashevsky Institute of Epidemiology & Infectious Diseases NAMS of Ukraine, JSC Farmak""  | Alla Mironenko et al    |
| EPI_ISL_582512,EPI_ISL_654819,EPI_ISL_1122014                                                                                                                                                                                                                                                                                                                          | Department of Respiratory and other Viral Infections of L.V.Gromashevsky Institute of Epidemiology & Infectious Diseases NAMS of Ukraine | Department of Respiratory and other Viral Infections of L.V.Gromashevsky Institute of Epidemiology & Infectious Diseases NAMS of Ukraine, JSC Farmak"" | Alla Mironenko et al    |
| EPI_ISL_737035,EPI_ISL_737211,EPI_ISL_738134,EPI_ISL_862054,EPI_ISL_862066,EPI_ISL_862102,EPI_ISL_1240105,EPI_ISL_1240166,EPI_ISL_1240690,EPI_ISL_1240691                                                                                                                                                                                                              | Department of Virology and Immunology, University of Helsinki and Helsinki University Hospital, Huslab Finland                           | Department of Virology, Faculty of Medicine, University of Helsinki, Helsinki, Finland                                                                 | Teemu Smura et al       |
| EPI_ISL_407084                                                                                                                                                                                                                                                                                                                                                         | Department of Virology III, National Institute of Infectious Diseases                                                                    | Pathogen Genomics Center, National Institute of Infectious Diseases                                                                                    | Tsuyoshi Sekizuka et al |
| EPI_ISL_1273443                                                                                                                                                                                                                                                                                                                                                        | Department of Virology, Bangabandhu Sheikh Mujib Medical University                                                                      | Bioinformatics Division, National Institute of Biotechnology (NIB)                                                                                     | Munira Jahan et al      |

|                                                                                                                                                                                                                                                                                                                                                                                                                                                                                                                             |                                                                                                                                             |                                                                                                                                        |                                         |
|-----------------------------------------------------------------------------------------------------------------------------------------------------------------------------------------------------------------------------------------------------------------------------------------------------------------------------------------------------------------------------------------------------------------------------------------------------------------------------------------------------------------------------|---------------------------------------------------------------------------------------------------------------------------------------------|----------------------------------------------------------------------------------------------------------------------------------------|-----------------------------------------|
| EPI_ISL_1015001,EPI_ISL_1015153,EPI_ISL_1015272,EPI_ISL_1015275,EPI_ISL_1015304,EPI_ISL_1015324                                                                                                                                                                                                                                                                                                                                                                                                                             | Department of Virology, Pitié-Salpêtrière hospital                                                                                          | Department of Virology, Pitié-Salpêtrière hospital                                                                                     | Valentin Leducq et al                   |
| EPI_ISL_855561,EPI_ISL_855568                                                                                                                                                                                                                                                                                                                                                                                                                                                                                               | Department of Virology, Principal Military Hospital of Instruction of Tunis                                                                 | Bundeswehr Institute of Microbiology                                                                                                   | Susann Handrick et al                   |
| EPI_ISL_793253                                                                                                                                                                                                                                                                                                                                                                                                                                                                                                              | Department of Virus and Microbiological Special Diagnostics, Statens Serum Institut, Copenhagen, Denmark                                    | Albertsen Lab, Department of Chemistry and Bioscience, Aalborg University, Denmark                                                     | Danish Covid-19 Genome Consortium et al |
| EPI_ISL_429413                                                                                                                                                                                                                                                                                                                                                                                                                                                                                                              | Department of Virus and Microbiological Special Diagnostics, Statens Serum Institut, Copenhagen, Denmark, Artillerivej 5, 2300 Copenhagen S | Albertsen lab, Department of Chemistry and Bioscience, Aalborg University, Denmark                                                     | Rasmus Kirkegaard et al                 |
| EPI_ISL_416142                                                                                                                                                                                                                                                                                                                                                                                                                                                                                                              | Department of Virus and Microbiological Special diagnostics, Statens Serum Institut, Copenhagen, Denmark.                                   | Statens Serum Institute                                                                                                                | Morten Rasmussen et al                  |
| EPI_ISL_416143                                                                                                                                                                                                                                                                                                                                                                                                                                                                                                              | Department of Virus and Microbiological Special diagnostics, Statens Serum Institut, Copenhagen, Denmark.                                   | VIFU                                                                                                                                   | Morten Rasmussen et al                  |
| EPI_ISL_615335,EPI_ISL_619762,EPI_ISL_621148,EPI_ISL_622417                                                                                                                                                                                                                                                                                                                                                                                                                                                                 | Department of Virus and Microbiological Special Diagnostics, Statens Serum Institut, Denmark                                                | Albertsen lab, Department of Chemistry and Bioscience, Aalborg University, Denmark                                                     | Danish Covid-19 Genome Consortium et al |
| EPI_ISL_664103                                                                                                                                                                                                                                                                                                                                                                                                                                                                                                              | Dept. of Microbiology and Infection Control, Akershus University Hospital HF                                                                | Dept. of Microbiology and Infection Control, Akershus University Hospital HF                                                           | Hege Vangstein Aamot et al              |
| EPI_ISL_410532,EPI_ISL_410531                                                                                                                                                                                                                                                                                                                                                                                                                                                                                               | Dept. of Pathology, National Institute of Infectious Diseases                                                                               | Pathogen Genomics Center, National Institute of Infectious Diseases                                                                    | Tsuyoshi Sekizuka et al                 |
| EPI_ISL_774874                                                                                                                                                                                                                                                                                                                                                                                                                                                                                                              | Designated Reference Institute for Chemical Measurements (DRICM)                                                                            | DNA SOLUTION LTD.                                                                                                                      | Md. Imran Khan et al                    |
| EPI_ISL_1020197                                                                                                                                                                                                                                                                                                                                                                                                                                                                                                             | Dinkes, Bogor, West Java                                                                                                                    | Biosafety Level-3 Laboratory, Indonesian Institute of Sciences (LIPI)                                                                  | Anik Budhi Dharmayanthi et al           |
| EPI_ISL_1137618                                                                                                                                                                                                                                                                                                                                                                                                                                                                                                             | Dirección de Sanidad Policia Nacional                                                                                                       | Instituto Nacional de Salud- Dirección de Investigación en Salud Pública                                                               | Katherine Laiton-Donato et al           |
| EPI_ISL_428479                                                                                                                                                                                                                                                                                                                                                                                                                                                                                                              | District Surveillance Unit                                                                                                                  | Department of Neurovirology, National Institute of Mental Health and Neuroscience (NIMHANS)                                            | Chitra Pattabiraman et al               |
| EPI_ISL_747261,EPI_ISL_747315,EPI_ISL_747316,EPI_ISL_747338,EPI_ISL_747344,EPI_ISL_747349,EPI_ISL_747353,EPI_ISL_747354,EPI_ISL_760063,EPI_ISL_760066,EPI_ISL_760115,EPI_ISL_760131,EPI_ISL_760133,EPI_ISL_850192,EPI_ISL_850212,EPI_ISL_850228,EPI_ISL_850654,EPI_ISL_850656,EPI_ISL_850657,EPI_ISL_955947,EPI_ISL_1063606,EPI_ISL_1063633,EPI_ISL_1063668,EPI_ISL_1165006,EPI_ISL_1165030,EPI_ISL_1165038,EPI_ISL_1165050,EPI_ISL_1165053,EPI_ISL_1165054,EPI_ISL_1165063,EPI_ISL_1252405,EPI_ISL_1252409,EPI_ISL_1252418 | Division of Emerging Infectious Diseases, Bureau of Infectious Diseases Diagnosis Control, Korea Disease Control and Prevention Agency      | Division of Emerging Infectious Diseases, Bureau of Infectious Diseases Diagnosis Control, Korea Disease Control and Prevention Agency | Ae Kyung Park et al                     |
| EPI_ISL_812963                                                                                                                                                                                                                                                                                                                                                                                                                                                                                                              | Division of Pathogen Resource Management, Korea National Institute of Health, Korea Disease Control and Prevention Agency                   | Division of Pathogen Resource Management, Korea National Institute of Health, Korea Disease Control and Prevention Agency              | Kim et al                               |
| EPI_ISL_412872,EPI_ISL_426164,EPI_ISL_426166,EPI_ISL_498034,EPI_ISL_498035,EPI_ISL_506972,EPI_ISL_506980,EPI_ISL_506994,EPI_ISL_514961,EPI_ISL_522474                                                                                                                                                                                                                                                                                                                                                                       | Division of Viral Diseases, Center for Laboratory Control of Infectious Diseases, Korea Centers for Diseases Control and Prevention         | Division of Viral Diseases, Center for Laboratory Control of Infectious Diseases, Korea Centers for Diseases Control and Prevention    | Jeong-Min Kim et al                     |
| EPI_ISL_583734,EPI_ISL_583846                                                                                                                                                                                                                                                                                                                                                                                                                                                                                               | Dr. Gernot Walder GmbH                                                                                                                      | Bergthaler laboratory, CeMM Research Center for Molecular Medicine of the Austrian Academy of Sciences                                 | Alexandra Popa et al                    |

|                                                                                                                                                                                                                                                                                                                                                                                                                                                                                                                                                                                                                                                                                                                                                                                                                |                                                                                                       |                                                                                                                        |                              |
|----------------------------------------------------------------------------------------------------------------------------------------------------------------------------------------------------------------------------------------------------------------------------------------------------------------------------------------------------------------------------------------------------------------------------------------------------------------------------------------------------------------------------------------------------------------------------------------------------------------------------------------------------------------------------------------------------------------------------------------------------------------------------------------------------------------|-------------------------------------------------------------------------------------------------------|------------------------------------------------------------------------------------------------------------------------|------------------------------|
| EPI_ISL_722508,EPI_ISL_722538,EPI_ISL_722539,EPI_ISL_722541,EPI_ISL_722706,EPI_ISL_763161,EPI_ISL_422933,EPI_ISL_460858,EPI_ISL_460991,EPI_ISL_523165,EPI_ISL_523535,EPI_ISL_577876,EPI_ISL_577928                                                                                                                                                                                                                                                                                                                                                                                                                                                                                                                                                                                                             | Dutch COVID-19 response team                                                                          | Erasmus Medical Center                                                                                                 | Bas Oude Munnink et al       |
| EPI_ISL_1120177,EPI_ISL_1120178,EPI_ISL_1120495,EPI_ISL_1120517,EPI_ISL_1158727,EPI_ISL_1210393                                                                                                                                                                                                                                                                                                                                                                                                                                                                                                                                                                                                                                                                                                                | Dutch COVID-19 response team                                                                          | Medical Microbiology, Maastricht University Medical Centre                                                             | Jozef Dingemans* et al       |
| EPI_ISL_905532,EPI_ISL_1288926,EPI_ISL_547445,EPI_ISL_547446,EPI_ISL_547447,EPI_ISL_547448,EPI_ISL_547449,EPI_ISL_547450,EPI_ISL_547452,EPI_ISL_636493,EPI_ISL_636513,EPI_ISL_636514,EPI_ISL_636515,EPI_ISL_636516,EPI_ISL_636517,EPI_ISL_636518,EPI_ISL_636521,EPI_ISL_904762,EPI_ISL_1014269,EPI_ISL_1014280,EPI_ISL_1014281,EPI_ISL_1014282,EPI_ISL_1014552,EPI_ISL_1014557,EPI_ISL_1014558,EPI_ISL_1014561,EPI_ISL_1014571,EPI_ISL_1014572,EPI_ISL_1014573,EPI_ISL_1014574,EPI_ISL_1014575,EPI_ISL_1014576,EPI_ISL_1014588,EPI_ISL_1014594,EPI_ISL_1035061,EPI_ISL_1035238,EPI_ISL_1035240,EPI_ISL_1035241,EPI_ISL_1035245,EPI_ISL_1035247,EPI_ISL_1035764,EPI_ISL_1035766,EPI_ISL_1035769,EPI_ISL_1059905,EPI_ISL_1165526,EPI_ISL_1165527,EPI_ISL_1165529,EPI_ISL_1165530,EPI_ISL_1232247,EPI_ISL_1232248 | Dutch COVID-19 response team                                                                          | National Institute for Public Health and the Environment (RIVM)                                                        | Adam Meijer et al            |
| EPI_ISL_961803                                                                                                                                                                                                                                                                                                                                                                                                                                                                                                                                                                                                                                                                                                                                                                                                 | E. Gulbja laboratorija                                                                                | Latvian Biomedical Research and Study Centre                                                                           | Janis Pjalkovskis et al      |
| EPI_ISL_492993                                                                                                                                                                                                                                                                                                                                                                                                                                                                                                                                                                                                                                                                                                                                                                                                 | E. Gulbja Laboratorija                                                                                | Latvian Biomedical Research and Study Centre                                                                           | Ivars Silamiķelis et al      |
| EPI_ISL_593534,EPI_ISL_770826                                                                                                                                                                                                                                                                                                                                                                                                                                                                                                                                                                                                                                                                                                                                                                                  | Eastern Ontario Regional Laboratory Association                                                       | McMaster University                                                                                                    | Leanne Mortimer et al        |
| EPI_ISL_1238792                                                                                                                                                                                                                                                                                                                                                                                                                                                                                                                                                                                                                                                                                                                                                                                                | Ecological and Evolutionary Genomics. UGA-CINVESTAV                                                   | Unidad Universitaria de Secuenciación Masiva y Bioinformática (UUSMB). IBT-UNAM                                        | Angelica Cibrian et al       |
| EPI_ISL_475724                                                                                                                                                                                                                                                                                                                                                                                                                                                                                                                                                                                                                                                                                                                                                                                                 | Egyptian National Cancer Institute (ENCI)                                                             | Egyptian National Cancer Institute (ENCI)                                                                              | Zekri et al                  |
| EPI_ISL_1122015,EPI_ISL_1121993                                                                                                                                                                                                                                                                                                                                                                                                                                                                                                                                                                                                                                                                                                                                                                                | Emergency department of COVID-19, Beijing Ditan Hospital                                              | National Institute for Viral Disease Control and Prevention                                                            | Yang Song2* et al            |
| EPI_ISL_708826,EPI_ISL_708822                                                                                                                                                                                                                                                                                                                                                                                                                                                                                                                                                                                                                                                                                                                                                                                  | Emergency Operation Center, (EOC)                                                                     | National Institute of Health, Department of Medical Sciences, Ministry of Public Health, Thailand                      | Pilailuk Okada et al         |
| EPI_ISL_1273097                                                                                                                                                                                                                                                                                                                                                                                                                                                                                                                                                                                                                                                                                                                                                                                                | Faculty of Medicine, Al-Quds University                                                               | Faculty of Medicine, Al-Quds University                                                                                | Ereqat et al                 |
| EPI_ISL_451970                                                                                                                                                                                                                                                                                                                                                                                                                                                                                                                                                                                                                                                                                                                                                                                                 | Federal Budget Institution of Science, State Research Center for Applied Microbiology & Biotechnology | Federal Budget Institution of Science, State Research Center for Applied Microbiology & Biotechnology                  | Dyatlov I et al              |
| EPI_ISL_419559                                                                                                                                                                                                                                                                                                                                                                                                                                                                                                                                                                                                                                                                                                                                                                                                 | FL Bureau of Public Health Laboratories-Tampa                                                         | Pathogen Discovery, Respiratory Viruses Branch, Division of Viral Diseases, Centers for Disease Control and Prevention | Anna Uehara et al            |
| EPI_ISL_508768,EPI_ISL_549256                                                                                                                                                                                                                                                                                                                                                                                                                                                                                                                                                                                                                                                                                                                                                                                  | Florida Bureau of Public Health Laboratories                                                          | Florida Bureau of Public Health Laboratories                                                                           | Sarah Schmedes et al         |
| EPI_ISL_541194                                                                                                                                                                                                                                                                                                                                                                                                                                                                                                                                                                                                                                                                                                                                                                                                 | Florida Bureau of Public Health Laboratories, Florida Department of Health                            | Florida Bureau of Public Health Laboratories, Florida Department of Health                                             | Schmedes et al               |
| EPI_ISL_476139                                                                                                                                                                                                                                                                                                                                                                                                                                                                                                                                                                                                                                                                                                                                                                                                 | Folkhalsomyndigheten                                                                                  | The Public Health Agency of Sweden                                                                                     | Oskar Karlsson Lindsjo et al |

|                                                                                                                         |                                                                                                                                                                          |                                                                                                                                                                                                                            |                                  |
|-------------------------------------------------------------------------------------------------------------------------|--------------------------------------------------------------------------------------------------------------------------------------------------------------------------|----------------------------------------------------------------------------------------------------------------------------------------------------------------------------------------------------------------------------|----------------------------------|
| EPI_ISL_581455,EPI_ISL_581487,EPI_ISL_581489,EPI_ISL_581490,EPI_ISL_581491,EPI_ISL_581492,EPI_ISL_581493                | Fondation Congolaise pour la recherche medicale (FCRM)                                                                                                                   | NGS Competence Center Tübingen, Institut für Medizinische Mikrobiologie und Hygiene, Universitätsklinikum Tübingen                                                                                                         | Angel Angelov et al              |
| EPI_ISL_912361,EPI_ISL_912376,EPI_ISL_912377,EPI_ISL_912378,EPI_ISL_912379,EPI_ISL_912380,EPI_ISL_912390,EPI_ISL_912391 | Fondation Congolaise pour la recherche medicale (FCRM), Francine Ntumi                                                                                                   | NGS Competence Center Tuebingen, Institut für Medizinische Mikrobiologie und Hygiene, Universitaetsklinikum Tübingen                                                                                                       | Angel Angelov et al              |
| EPI_ISL_1210559,EPI_ISL_1210584,EPI_ISL_1210589                                                                         | FSBI «NATIONAL MEDICAL RESEARCH CENTER FOR OBSTETRICS, GYNECOLOGY AND PERINATOLOGY NAMED AFTER ACADEMICIAN V.I.KULAKOV» MINISTRY OF HEALTHCARE OF THE RUSSIAN FEDERATION | Center for Precision Genome Editing and Genetic Technologies for Biomedicine, Pirogov Medical University, Moscow, Russian Federation                                                                                       | Yegor Botsmanov et al            |
| EPI_ISL_428851                                                                                                          | FSBSI Chumakov Federal Scientific Center for Research and Development of Immune-and-Biological Products of Russian Academy of Sciences""                                 | FSBSI Chumakov Federal Scientific Center for Research and Development of Immune-and-Biological Products of Russian Academy of Sciences" & NRC "Kurchatov institute""                                                       | Liubov Kozlovskaya et al         |
| EPI_ISL_431240,EPI_ISL_431180                                                                                           | Fujian Center for Disease Control and Prevention                                                                                                                         | Fujian Center for Disease Control and Prevention                                                                                                                                                                           | Lin Qi et al                     |
| EPI_ISL_1239137,EPI_ISL_1239138                                                                                         | Fundação Ezequiel Dias                                                                                                                                                   | Coordenação Geral de Laboratórios de Saúde Pública (CGLAB)                                                                                                                                                                 | Vagner Fonseca et al et al       |
| EPI_ISL_1186078,EPI_ISL_1251297                                                                                         | Furst Medical Laboratory                                                                                                                                                 | Norwegian Institute of Public Health, Department of Virology                                                                                                                                                               | Kathrine Stene-Johansen et al    |
| EPI_ISL_661287                                                                                                          | Gavle klinisk mikrobiologi                                                                                                                                               | The Public Health Agency of Sweden                                                                                                                                                                                         | Department of Microbiology et al |
| EPI_ISL_730567,EPI_ISL_730620,EPI_ISL_984987                                                                            | Gazi University Faculty of Medicine, Medical Virology Laboratory                                                                                                         | Gazi University Faculty of Medicine, Medical Virology Laboratory                                                                                                                                                           | Erdem Şahin et al                |
| EPI_ISL_1185245,EPI_ISL_1184582                                                                                         | Genelabs Medical (Pvt) Ltd                                                                                                                                               | Genelabs Medical (Pvt) Ltd                                                                                                                                                                                                 | Chandanamali Punchihewa et al    |
| EPI_ISL_1014934,EPI_ISL_1018115,EPI_ISL_1138410                                                                         | General Hospital - Ohrid                                                                                                                                                 | Research Center for Genetic Engineering and Biotechnology Georgi D. Efremov" , Macedonian Academy of Sciences and Arts"                                                                                                    | Aleksandar J. Dimovski et al     |
| EPI_ISL_1014936                                                                                                         | General Hospital - Prilep                                                                                                                                                | Research Center for Genetic Engineering and Biotechnology Georgi D. Efremov" , Macedonian Academy of Sciences and Arts"                                                                                                    | Aleksandar J. Dimovski et al     |
| EPI_ISL_677674                                                                                                          | General Hospital - Prilep                                                                                                                                                | Research Center for Genetic Engineering and Biotechnology Georgi D. Efremov" , Macedonian Academy of Sciences and Arts"                                                                                                    | RCGEB - MASA et al               |
| EPI_ISL_678254                                                                                                          | General Hospital - Strumica                                                                                                                                              | Research Center for Genetic Engineering and Biotechnology Georgi D. Efremov" , Macedonian Academy of Sciences and Arts"                                                                                                    | RCGEB - MASA et al               |
| EPI_ISL_406801,EPI_ISL_406798                                                                                           | General Hospital of Central Theater Command of People's Liberation Army of China                                                                                         | BGI & Institute of Microbiology, Chinese Academy of Sciences & Shandong First Medical University & Shandong Academy of Medical Sciences & General Hospital of Central Theater Command of People's Liberation Army of China | Weijun Chen et al                |
| EPI_ISL_614282,EPI_ISL_614283,EPI_ISL_623097,EPI_ISL_693774                                                             | General practitioner                                                                                                                                                     | National Reference Center for Viruses of Respiratory Infections, Institut Pasteur, Paris                                                                                                                                   | Marion Barbet et al              |
| EPI_ISL_888828                                                                                                          | General practitioner office                                                                                                                                              | National Reference Center for Viruses of Respiratory Infections, Institut Pasteur, Paris                                                                                                                                   | Marion Barbet et al              |

|                                                                                                                                                                                                                                                                                                                                                                                                                        |                                                                                                              |                                                                                      |                              |
|------------------------------------------------------------------------------------------------------------------------------------------------------------------------------------------------------------------------------------------------------------------------------------------------------------------------------------------------------------------------------------------------------------------------|--------------------------------------------------------------------------------------------------------------|--------------------------------------------------------------------------------------|------------------------------|
| EPI_ISL_746504,EPI_ISL_746598,EPI_ISL_746601,EPI_ISL_746639,EPI_ISL_746728,EPI_ISL_746729,EPI_ISL_746744,EPI_ISL_746771,EPI_ISL_1167671,EPI_ISL_1167691,EPI_ISL_116765,EPI_ISL_1167799,EPI_ISL_1167804,EPI_ISL_1167812,EPI_ISL_1167830,EPI_ISL_1167832,EPI_ISL_1167925,EPI_ISL_1167927,EPI_ISL_1167931,EPI_ISL_1167932,EPI_ISL_1300469,EPI_ISL_1300470,EPI_ISL_1300479,EPI_ISL_1300504,EPI_ISL_1300510,EPI_ISL_1300519 | Genetica Molecular and Subdepartamento de Virologia ISP Chile                                                | Instituto de Salud Publica de Chile                                                  | Javier Tognarelli et al      |
| EPI_ISL_480243,EPI_ISL_480267,EPI_ISL_480283,EPI_ISL_480290,EPI_ISL_735259,EPI_ISL_735276                                                                                                                                                                                                                                                                                                                              | Genomic Laboratory (GLAB) (Conjoint lab of Health Directorate of Istanbul and Istanbul Technical University) | Genomic Laboratory (GLAB), Istanbul Technical University                             | Ilker Karacan et al          |
| EPI_ISL_632908                                                                                                                                                                                                                                                                                                                                                                                                         | Genomic Sciences, Rehman Medical Institute                                                                   | Genomic Sciences, Rehman Medical Institute                                           | Ali et al                    |
| EPI_ISL_812837,EPI_ISL_812809,EPI_ISL_812814,EPI_ISL_812858,EPI_ISL_812786,EPI_ISL_812868,EPI_ISL_812869                                                                                                                                                                                                                                                                                                               | Genomics Program, Children Cancer Hospital                                                                   | Genomics Program, Children Cancer Hospital                                           | Hatem et al                  |
| EPI_ISL_1220317,EPI_ISL_1220321                                                                                                                                                                                                                                                                                                                                                                                        | GH BORDEAUX                                                                                                  | CNR Virus des Infections Respiratoires - France SUD                                  | Antonin Bal et al            |
| EPI_ISL_1265821                                                                                                                                                                                                                                                                                                                                                                                                        | GHE REUNION                                                                                                  | CNR Virus des Infections Respiratoires - France SUD                                  | Antonin Bal et al            |
| EPI_ISL_775214                                                                                                                                                                                                                                                                                                                                                                                                         | Gonoshasthya-RNA Molecular Research Center                                                                   | Gonoshasthya-RNA Molecular Research Center                                           | Mohd. Raed Jamiruddin et al  |
| EPI_ISL_906306                                                                                                                                                                                                                                                                                                                                                                                                         | Gorgas memorial Institute For Health Studies                                                                 | Gorgas memorial Institute For Health Studies                                         | Diaz Y et al                 |
| EPI_ISL_496605,EPI_ISL_496606,EPI_ISL_496607,EPI_ISL_496609,EPI_ISL_496615,EPI_ISL_496617,EPI_ISL_496647,EPI_ISL_496651,EPI_ISL_496683,EPI_ISL_496736,EPI_ISL_496840,EPI_ISL_496907                                                                                                                                                                                                                                    | Gorgas Memorial Laboratory of Health Studies                                                                 | Gorgas Memorial Laboratory of Health Studies                                         | Danilo Franco et al          |
| EPI_ISL_1225381,EPI_ISL_1225382,EPI_ISL_1225392,EPI_ISL_1225393,EPI_ISL_1225400,EPI_ISL_1225420,EPI_ISL_1225431,EPI_ISL_1225457,EPI_ISL_1225506,EPI_ISL_1225520,EPI_ISL_1225537,EPI_ISL_1225544,EPI_ISL_1225545,EPI_ISL_1225548,EPI_ISL_1225550,EPI_ISL_1225560,EPI_ISL_1225572,EPI_ISL_1225574,EPI_ISL_1225577,EPI_ISL_1225578,EPI_ISL_1225580,EPI_ISL_1225581,EPI_ISL_1225582                                        | Gorgas Memorial Laboratory of Health Studies                                                                 | Gorgas Memorial Laboratory of Health Studies                                         | Yamilka Diaz et al           |
| EPI_ISL_495024                                                                                                                                                                                                                                                                                                                                                                                                         | Government Medical College, Bhavnagar                                                                        | Gujarat Biotechnology Research Centre                                                | Raghawendra Kumar et al      |
| EPI_ISL_794819                                                                                                                                                                                                                                                                                                                                                                                                         | Greek Genome Center, Biomedical Research Foundation of the Academy of Athens (BRFAA)                         | Greek Genome Center, Biomedical Research Foundation of the Academy of Athens (BRFAA) | Emmanouil Athanasiadis et al |
| EPI_ISL_640040,EPI_ISL_640045,EPI_ISL_640051,EPI_ISL_640058                                                                                                                                                                                                                                                                                                                                                            | Groote Schuur Hospital wc GSH                                                                                | NHLS/UCT                                                                             | Arash Iranzadeh et al        |
| EPI_ISL_698143,EPI_ISL_698144,EPI_ISL_698277,EPI_ISL_699147                                                                                                                                                                                                                                                                                                                                                            | Group 42 (G42) Healthcare, Abu Dhabi, United Arab Emirates; Department of Health, The United Arab Emirates   | G42 Healthcare                                                                       | Rong Liu et al               |

|                                                                                                                                 |                                                                                                                                                                      |                                                                                                                                                                                                                                                               |                                  |
|---------------------------------------------------------------------------------------------------------------------------------|----------------------------------------------------------------------------------------------------------------------------------------------------------------------|---------------------------------------------------------------------------------------------------------------------------------------------------------------------------------------------------------------------------------------------------------------|----------------------------------|
| EPI_ISL_1040923,EPI_ISL_1040924,EPI_ISL_1040925                                                                                 | Grupo de Investigación en Enfermedades Tropicales del Ejército (GINETEJ), Laboratorio de Referencia e Investigación, Dirección de Sanidad Ejército, Bogotá, Colombia | Centro de Investigaciones en Microbiología y Biotecnología-UR (CIMBIUR), Facultad de Ciencias Naturales, Universidad del Rosario, Bogotá, Colombia                                                                                                            | Juan David Ramirez et al         |
| EPI_ISL_447749                                                                                                                  | Grupo de Investigaciones Microbiológicas-UR (GIMUR), Departamento de Biología, Facultad de Ciencias Naturales, Universidad del Rosario, Bogotá, Colombia             | Grupo de Investigaciones Microbiológicas-UR (GIMUR), Departamento de Biología, Facultad de Ciencias Naturales, Universidad del Rosario, Bogotá, Colombia Instituto Nacional de Salud, Bogotá, Colombia Icahn School of Medicine at Mount Sinai, New York, USA | Juan David Ramirez et al         |
| EPI_ISL_1273049,EPI_ISL_1273060,EPI_ISL_1273064,EPI_ISL_1273063,EPI_ISL_1273057,EPI_ISL_1273052,EPI_ISL_1273071,EPI_ISL_1273073 | Guam Public Health Laboratory                                                                                                                                        | Centers for Disease Control and Prevention Division of Viral Diseases, Pathogen Discovery                                                                                                                                                                     | Krista Queen et al               |
| EPI_ISL_509710                                                                                                                  | Guatemala Ministry of Public Health                                                                                                                                  | Pathogen Discovery, Respiratory Viruses Branch, Division of Viral Diseases, Centers for Disease Control and Prevention                                                                                                                                        | Jing Zhang et al                 |
| EPI_ISL_509696,EPI_ISL_509697,EPI_ISL_509698,EPI_ISL_509699,EPI_ISL_509700,EPI_ISL_509703                                       | Guatemala Ministry of Public Health                                                                                                                                  | Pathogen Discovery, Respiratory Viruses Branch, Division of Viral Diseases, Centers for Disease Control and Prevention                                                                                                                                        | Ying Tao et al                   |
| EPI_ISL_482582                                                                                                                  | Hangzhou Center for Diseases Control and Prevention                                                                                                                  | Hangzhou Center for Diseases Control and Prevention                                                                                                                                                                                                           | Jun Li et al                     |
| EPI_ISL_796021,EPI_ISL_796012,EPI_ISL_796016                                                                                    | Hebei Provincial Center for Disease Control and Prevention, Shijiazhuang, Hebei Province; National Institute for Viral Disease Control and Prevention, China CDC     | Hebei Provincial Center for Disease Control and Prevention, Shijiazhuang, Hebei Province; National Institute for Viral Disease Control and Prevention, China CDC                                                                                              | Shunxiang Qi et al               |
| EPI_ISL_733433,EPI_ISL_733452,EPI_ISL_873038                                                                                    | HELIX LLC                                                                                                                                                            | WHO National Influenza Centre Russian Federation                                                                                                                                                                                                              | Andrey Komissarov et al          |
| EPI_ISL_501250,EPI_ISL_501249                                                                                                   | Hellenic Pasteur Institute, National Influenza Reference laboratory of Southern Greece & Unit of Bioinformatics and Applied Genomics                                 | Hellenic Pasteur Institute, National Influenza Reference laboratory of Southern Greece & Unit of Bioinformatics and Applied Genomics                                                                                                                          | Vasiliki Pogka et al             |
| EPI_ISL_699810,EPI_ISL_699881,EPI_ISL_700031                                                                                    | Hematopathology Laboratory, ACTREC, TMC                                                                                                                              | Hematopathology Laboratory, ACTREC, TMC                                                                                                                                                                                                                       | Hematopathology Laboratory et al |
| EPI_ISL_1170956                                                                                                                 | HIV Molecular Lab, Ethiopian Public Health Institute                                                                                                                 | HIV Molecular Lab                                                                                                                                                                                                                                             | Weldemariam et al                |
| EPI_ISL_1170957                                                                                                                 | HIV Molecular laboratory, Ethiopian Public Health Institute                                                                                                          | HIV Molecular Laboratory                                                                                                                                                                                                                                      | Weldemariam et al                |
| EPI_ISL_1169919                                                                                                                 | HIV Molecular Laboratory, Ethiopian Public Health Institute                                                                                                          | HIV Molecular Laboratory, Ethiopian Public Health Institute                                                                                                                                                                                                   | Weldemariam et al                |
| EPI_ISL_1170958                                                                                                                 | HIV Molecular Laboratory, Ethiopian Public Health Institute, Ethiopia                                                                                                | HIV molecular lab, Ethiopian Public Health Institute, Ethiopian                                                                                                                                                                                               | Weldemariam et al                |
| EPI_ISL_1196011,EPI_ISL_1196012,EPI_ISL_1196014                                                                                 | Homecare                                                                                                                                                             | National Institute for Communicable Diseases of the National Health Laboratory Service                                                                                                                                                                        | Maphalala GP et al               |
| EPI_ISL_414571                                                                                                                  | Hong Kong Department of Health                                                                                                                                       | School of Public Health, The University of Hong Kong                                                                                                                                                                                                          | Dominic N.C. Tsang et al         |
| EPI_ISL_1001389                                                                                                                 | hopital                                                                                                                                                              | National Reference Center for Viruses of Respiratory Infections, Institut Pasteur, Paris                                                                                                                                                                      | Marion Barbet et al              |



|                                                                                                                                                                                                                                                                                                                                                                                                                                                                                                                                                                                                                       |                                                                                        |                                                                                                                                            |                                                                   |
|-----------------------------------------------------------------------------------------------------------------------------------------------------------------------------------------------------------------------------------------------------------------------------------------------------------------------------------------------------------------------------------------------------------------------------------------------------------------------------------------------------------------------------------------------------------------------------------------------------------------------|----------------------------------------------------------------------------------------|--------------------------------------------------------------------------------------------------------------------------------------------|-------------------------------------------------------------------|
| EPI_ISL_846649,EPI_ISL_872255,EPI_ISL_872276,EPI_ISL_935562,EPI_ISL_953961,EPI_ISL_954018,EPI_ISL_955075,EPI_ISL_955096,EPI_ISL_955100,EPI_ISL_995482,EPI_ISL_1001404,EPI_ISL_1060394,EPI_ISL_1096298,EPI_ISL_1110983,EPI_ISL_1110989,EPI_ISL_1110990,EPI_ISL_1110992,EPI_ISL_1110993,EPI_ISL_1110995,EPI_ISL_1110999,EPI_ISL_1111000,EPI_ISL_1111001,EPI_ISL_1111003,EPI_ISL_1111020,EPI_ISL_1111021,EPI_ISL_1111024,EPI_ISL_1111026,EPI_ISL_1111027,EPI_ISL_1111061,EPI_ISL_1118892,EPI_ISL_1118893,EPI_ISL_1239370,EPI_ISL_1259297,EPI_ISL_1259307,EPI_ISL_1301934,EPI_ISL_1168193,EPI_ISL_1168194,EPI_ISL_1259296 | Hopital                                                                                | National Reference Center for Viruses of Respiratory Infections, Institut Pasteur, Paris                                                   | Marion Barbet et al                                               |
| EPI_ISL_560589                                                                                                                                                                                                                                                                                                                                                                                                                                                                                                                                                                                                        | Hopital                                                                                | National Reference Center for Viruses of Respiratory Infections, Institut Pasteur, Paris                                                   | Sylvie Behillil et al                                             |
| EPI_ISL_560569                                                                                                                                                                                                                                                                                                                                                                                                                                                                                                                                                                                                        | hôpital                                                                                | National Reference Center for Viruses of Respiratory Infections, Institut Pasteur, Paris                                                   | Sylvie Behillil et al                                             |
| EPI_ISL_833198                                                                                                                                                                                                                                                                                                                                                                                                                                                                                                                                                                                                        | Hôpital Bichat Claude Bernard, Laboratoire de Virologie                                | IAME UMR1137 Inserm, Université de Paris, Hôpital Bichat                                                                                   | Antoine Bridier et al                                             |
| EPI_ISL_940171,EPI_ISL_940190,EPI_ISL_940255,EPI_ISL_940543,EPI_ISL_1296407                                                                                                                                                                                                                                                                                                                                                                                                                                                                                                                                           | Hôpital Bichat Claude Bernard, Laboratoire de Virologie                                | IAME UMR1137 Inserm, Université de Paris, Hôpital Bichat                                                                                   | Antoine Bridier-Nahmias et al                                     |
| EPI_ISL_710534,EPI_ISL_712060                                                                                                                                                                                                                                                                                                                                                                                                                                                                                                                                                                                         | Hôpital Fattouma-Bourguiba de Monastir                                                 | Laboratoire des Procédés de Criblage Moléculaire et Cellulaire-Centre de Biotechnologie de Sfax                                            | Souissi et al                                                     |
| EPI_ISL_1164947                                                                                                                                                                                                                                                                                                                                                                                                                                                                                                                                                                                                       | Hôpital Georges L. Dumont                                                              | National Microbiology Laboratory (NML)                                                                                                     | Anna Majer et al                                                  |
| EPI_ISL_912734,EPI_ISL_982182,EPI_ISL_982183                                                                                                                                                                                                                                                                                                                                                                                                                                                                                                                                                                          | Hôpital Henri Mondor                                                                   | Department of Virology, Henri Mondor University Hospital, Assistance Publique Hôpitaux de Paris, Université Paris-Est Créteil, INSERM U955 | Christophe Rodriguez et al                                        |
| EPI_ISL_1200857,EPI_ISL_1201852                                                                                                                                                                                                                                                                                                                                                                                                                                                                                                                                                                                       | HOPITAL SAINT ANDRE                                                                    | CNR Virus des Infections Respiratoires - France SUD                                                                                        | Antonin Bal et al                                                 |
| EPI_ISL_1191681,EPI_ISL_1191682                                                                                                                                                                                                                                                                                                                                                                                                                                                                                                                                                                                       | HOPITAL UNIVERSITAIRE DE FORT DE FRANCE                                                | CNR Virus des Infections Respiratoires - France SUD                                                                                        | Antonin Bal et al                                                 |
| EPI_ISL_718236,EPI_ISL_718241,EPI_ISL_718244,EPI_ISL_855355,EPI_ISL_855382                                                                                                                                                                                                                                                                                                                                                                                                                                                                                                                                            | Hospital                                                                               | National Reference Center for Viruses of Respiratory Infections, Institut Pasteur, Paris                                                   | Marion Barbet et al                                               |
| EPI_ISL_560603,EPI_ISL_560612,EPI_ISL_560617,EPI_ISL_560618,EPI_ISL_560646                                                                                                                                                                                                                                                                                                                                                                                                                                                                                                                                            | Hospital                                                                               | National Reference Center for Viruses of Respiratory Infections, Institut Pasteur, Paris                                                   | Sylvie Behillil et al                                             |
| EPI_ISL_682239                                                                                                                                                                                                                                                                                                                                                                                                                                                                                                                                                                                                        | HOSPITAL CIUDAD NEILY                                                                  | Incienza, Instituto Costarricense de Investigación y Enseñanza en Nutrición y Salud                                                        | Francisco Duarte et al                                            |
| EPI_ISL_541038                                                                                                                                                                                                                                                                                                                                                                                                                                                                                                                                                                                                        | Hospital Clínico Universitario de Santiago de Compostela                               | SeqCOVID-SPAIN consortium/Institute of Biomedicine of Valencia, IBV-CSIC                                                                   | José Javier Costa Alcalde et al                                   |
| EPI_ISL_672726                                                                                                                                                                                                                                                                                                                                                                                                                                                                                                                                                                                                        | Hospital das Clínicas da Faculdade de Medicina da Universidade de São Paulo (HC-FMUSP) | Laboratório de Parasitologia Médica - Instituto de Medicina Tropical - Universidade de São Paulo                                           | Brazil-UK Centre for Arbovirus Discovery Diagnosis Genomics et al |
| EPI_ISL_722062,EPI_ISL_722069                                                                                                                                                                                                                                                                                                                                                                                                                                                                                                                                                                                         | Hospital das Clínicas Universidade de São Paulo Medical School                         | Laboratório de Parasitologia Médica - Instituto de Medicina Tropical - Universidade de São Paulo                                           | Brazil-UK Centre for Arbovirus Discovery Diagnosis Genomics et al |
| EPI_ISL_511578                                                                                                                                                                                                                                                                                                                                                                                                                                                                                                                                                                                                        | Hospital de Braga                                                                      | Instituto Nacional de Saude (INSA)                                                                                                         | Borges et al et al                                                |

|                                                             |                                                                                                |                                                                                                                                        |                                                                               |
|-------------------------------------------------------------|------------------------------------------------------------------------------------------------|----------------------------------------------------------------------------------------------------------------------------------------|-------------------------------------------------------------------------------|
| EPI_ISL_914816                                              | HOSPITAL DE NIÑOS DR. CARLOS SAENZ HERRERA                                                     | Inciensa, Instituto Costarricense de Investigación y Enseñanza en Nutrición y Salud                                                    | Francisco Duarte et al                                                        |
| EPI_ISL_512672,EPI_ISL_512674,EPI_ISL_527750                | Hospital De Niños Dr. Carlos Saenz Herrera [San Jose/San Jose]                                 | Inciensa, Instituto Costarricense de Investigación y Enseñanza en Nutrición y Salud                                                    | Francisco Duarte et al                                                        |
| EPI_ISL_1196433                                             | HOSPITAL DR. ENRIQUE BALTODANO BRICEÑO                                                         | Inciensa, Instituto Costarricense de Investigación y Enseñanza en Nutrición y Salud                                                    | Francisco Duarte et al                                                        |
| EPI_ISL_914795                                              | HOSPITAL DR. FERNANDO ESCALANTE PRADILLA                                                       | Inciensa, Instituto Costarricense de Investigación y Enseñanza en Nutrición y Salud                                                    | Francisco Duarte et al                                                        |
| EPI_ISL_1196430                                             | HOSPITAL DR. MAX PERALTA JIMENEZ                                                               | Inciensa, Instituto Costarricense de Investigación y Enseñanza en Nutrición y Salud                                                    | Francisco Duarte et al                                                        |
| EPI_ISL_770028                                              | Hospital Dr. Raul Blanco Cervantes                                                             | Inciensa, Instituto Costarricense de Investigación y Enseñanza en Nutrición y Salud                                                    | Francisco Duarte et al                                                        |
| EPI_ISL_491447                                              | Hospital Fernando Escalante Pradilla                                                           | Inciensa, Instituto Costarricense de Investigación y Enseñanza en Nutrición y Salud                                                    | Francisco Duarte et al                                                        |
| EPI_ISL_458028                                              | Hospital for Tropical Diseases                                                                 | COVID-19 Network Investigations (CONI) Alliance                                                                                        | Elizabeth Batty et al                                                         |
| EPI_ISL_424731                                              | Hospital General Regional No.66, Ciudad Juárez, Chihuahua.                                     | Laboratorio Central de Epidemiología-DLVIE / Laboratorio de Secuenciación-Centro de Instrumentos. Instituto Mexicano del Seguro Social | Muñoz-Medina JE et al                                                         |
| EPI_ISL_814032,EPI_ISL_814033                               | Hospital General Universitario Gregorio Marañón                                                | SeqCOVID-SPAIN consortium/IBV(CSIC)                                                                                                    | Darío García de Viedma et al                                                  |
| EPI_ISL_481246,EPI_ISL_481247,EPI_ISL_481248,EPI_ISL_574431 | Hospital IESS Babahoyo                                                                         | Institute of Microbiology, Universidad San Francisco de Quito                                                                          | Belén Prado-Vivar et al                                                       |
| EPI_ISL_412964                                              | Hospital Israelita Albert Einstein                                                             | Instituto Adolfo Lutz Interdisciplinary Procedures Center Strategic Laboratory                                                         | Jaqueline Goes de Jesus et al                                                 |
| EPI_ISL_413016                                              | Hospital Israelita Albert Einstein                                                             | Instituto Adolfo Lutz, Interdisciplinary Procedures Center, Strategic Laboratory                                                       | Jaqueline Goes de Jesus et al                                                 |
| EPI_ISL_1196660                                             | Hospital Melaka                                                                                | Institute for Medical Research, Infectious Disease Research Centre, National Institutes of Health, Ministry of Health Malaysia         | Suppiah J et al                                                               |
| EPI_ISL_527739                                              | Hospital Mexico [San Jose/San Jose]                                                            | Inciensa, Instituto Costarricense de Investigación y Enseñanza en Nutrición y Salud                                                    | Francisco Duarte et al                                                        |
| EPI_ISL_480326,EPI_ISL_480327                               | Hospital Nacional de Niños                                                                     | Charité Virology-University of Costa Rica                                                                                              | Andres Moreira-Soto et al                                                     |
| EPI_ISL_471271,EPI_ISL_471270,EPI_ISL_471269                | Hospital Oncológico Solca Núcleo de Quito                                                      | Institute of Microbiology, Universidad San Francisco de Quito                                                                          | Sully Márquez et al                                                           |
| EPI_ISL_1186114                                             | Hospital Queen Elizabeth                                                                       | Institute for Medical Research, Infectious Disease Research Centre, National Institutes of Health, Ministry of Health Malaysia         | Suppiah J et al                                                               |
| EPI_ISL_936489                                              | Hospital Raja Perempuan Zainab II                                                              | Institute for Medical Research, Infectious Disease Research Centre, National Institutes of Health, Ministry of Health Malaysia         | Suppiah J et al                                                               |
| EPI_ISL_682262,EPI_ISL_682273                               | HOSPITAL SAN JUAN DE DIOS                                                                      | Inciensa, Instituto Costarricense de Investigación y Enseñanza en Nutrición y Salud                                                    | Francisco Duarte et al                                                        |
| EPI_ISL_414015,EPI_ISL_414016                               | Hospital São Joaquim Beneficencia Portuguesa                                                   | Instituto Adolfo Lutz, Interdisciplinary Procedures Center, Strategic Laboratory                                                       | Claudio Tavares Sacchi et al                                                  |
| EPI_ISL_902747                                              | Hospital Universitari Germans Trias i Pujol (HUGTiP) / Fundació Lluita contra la SIDA (FLSida) | IrsiCaixa - Can Ruti CovidSeq                                                                                                          | Fundació IrsiCaixa. Hospital Universitari Germans Trias i Pujol(HUGTiP) et al |
| EPI_ISL_1017707,EPI_ISL_1017708,EPI_ISL_1017710             | Hospital Universitario Hernando Moncaleano Perdomo                                             | Instituto Nacional de Salud- Dirección de Investigación en Salud Pública                                                               | Katherine Laiton-Donato et al                                                 |
| EPI_ISL_693536,EPI_ISL_693537                               | Hospital Vila Franca de Xira                                                                   | Instituto Nacional de Saude (INSA)                                                                                                     | Borges et al et al                                                            |
| EPI_ISL_434771,EPI_ISL_787608,EPI_ISL_790183,EPI_ISL_790302 | Houston Methodist Hospital                                                                     | Houston Methodist Hospital                                                                                                             | S. Wesley Long et al                                                          |
| EPI_ISL_636975,EPI_ISL_636977,EPI_ISL_636978                | HP Pemba                                                                                       | KRISP, KZN Research Innovation and Sequencing Platform                                                                                 | Ismael N et al                                                                |
| EPI_ISL_445088                                              | Human Genetic Research Center, Kawsar Biotech Company                                          | Human Genetic Research Center, Kawsar Biotech Company                                                                                  | Abbasalipour Bashash et al                                                    |
| EPI_ISL_645080                                              | Human Genome Variation Research Group, Malopolska Centre of Biotechnology                      | Human Genome Variation Research Group, Malopolska Centre of Biotechnology                                                              | Kowalski et al                                                                |
| EPI_ISL_526225                                              | Hungarian Defence Forces Military Medical Centre                                               | National Laboratory of Virology, Szentágothai Research Centre                                                                          | Endre Gábor Tóth et al                                                        |
| EPI_ISL_759956                                              | Husada Utama Hospital                                                                          | Institute of Tropical Disease, Universitas Airlangga                                                                                   | Jezy R Dewantari et al                                                        |

|                                                                                                                                                       |                                                                                     |                                                                                                                                                                                                                                                                                                                 |                                                             |
|-------------------------------------------------------------------------------------------------------------------------------------------------------|-------------------------------------------------------------------------------------|-----------------------------------------------------------------------------------------------------------------------------------------------------------------------------------------------------------------------------------------------------------------------------------------------------------------|-------------------------------------------------------------|
| EPI_ISL_1219022                                                                                                                                       | IAL Regional de Sorocaba                                                            | Instituto Adolfo Lutz, Interdisciplinary Procedures Center, Strategic Laboratory                                                                                                                                                                                                                                | Claudio Tavares Sacchi et al                                |
| EPI_ISL_404253                                                                                                                                        | IL Department of Public Health Chicago Laboratory                                   | Pathogen Discovery, Respiratory Viruses Branch, Division of Viral Diseases, Centers for Disease Control and Prevention                                                                                                                                                                                          | Ying Tao et al                                              |
| EPI_ISL_961988                                                                                                                                        | Illinois Department of Public Health                                                | Gagnon Lab, Southern Illinois University                                                                                                                                                                                                                                                                        | Keith Gagnon et al                                          |
| EPI_ISL_1063818,EPI_ISL_1063886,EPI_ISL_1063895,EPI_ISL_1063896                                                                                       | Immunogenomics lab, Institute of Life Sciences, Bhubaneswar                         | Immunogenomics lab, Institute of Life Sciences, Bhubaneswar                                                                                                                                                                                                                                                     | Sunil K. Raghav et al                                       |
| EPI_ISL_1018099                                                                                                                                       | Immunology, Noguchi Memorial Institute for Medical Research                         | Immunology, Noguchi Memorial Institute for Medical Research                                                                                                                                                                                                                                                     | Adu et al                                                   |
| EPI_ISL_648212,EPI_ISL_648677                                                                                                                         | INBIRS-UBA                                                                          | Laboratorio Mixto de Biotecnología Acuática (LMBA)                                                                                                                                                                                                                                                              | Joaquín Ezpeleta et al                                      |
| EPI_ISL_476704,EPI_ISL_476702                                                                                                                         | Incubadora Venezolana de Ciencia, Venezuela                                         | Incubadora Venezolana de Ciencia, Venezuela / Instituto Nacional de Salud, Bogotá, Colombia / Grupo de Investigaciones Microbiológicas-UR (GIMUR), Departamento de Biología, Facultad de Ciencias Naturales, Universidad del Rosario, Bogotá, Colombia / Icahn School of Medicine at Mount Sinai, New York, USA | Alberto Paniz-Mondolfi et al                                |
| EPI_ISL_413522                                                                                                                                        | Indian Council of Medical Research - National Institute of Virology                 | National Influenza Center, Indian Council of Medical Research - National Institute of Virology                                                                                                                                                                                                                  | Potdar V et al                                              |
| EPI_ISL_413523                                                                                                                                        | Indian Council of Medical Research-National Institute of Virology                   | National Influenza Center, Indian Council of Medical Research-National Institute of Virology                                                                                                                                                                                                                    | Potdar V et al                                              |
| EPI_ISL_496372                                                                                                                                        | Infectolab                                                                          | Andersen lab at Scripps Research                                                                                                                                                                                                                                                                                | SEARCH Alliance San Diego with Samuel Navarro Alvarez et al |
| EPI_ISL_677895,EPI_ISL_677902                                                                                                                         | Innovative Genomics Institute, UC Berkeley                                          | Innovative Genomics Institute, UC Berkeley                                                                                                                                                                                                                                                                      | Stacia Wyman et al                                          |
| EPI_ISL_806544                                                                                                                                        | INSPI Instituto Nacional de Investigación en Salud Pública                          | Av. Julián Coronel 905 entre Esmeraldas y José Mascote Av. Juan Tanca Marengo No. 100 y Av. de las Américas                                                                                                                                                                                                     | Leandro Patiño et al                                        |
| EPI_ISL_826829                                                                                                                                        | INSPI-CRN DE INFLUENZA Y OTROS VIRUS RESPIRATORIOS                                  | Instituto de Salud Publica de Chile                                                                                                                                                                                                                                                                             | Javier Tognarelli et al                                     |
| EPI_ISL_811130                                                                                                                                        | Institut Central des Hôpitaux Valaisans ICHV/ZIWS Service des Maladies Infectieuses | Department of Biosystems Science and Engineering, ETH Zürich                                                                                                                                                                                                                                                    | Chaoran Chen et al                                          |
| EPI_ISL_437932,EPI_ISL_583600                                                                                                                         | Institut für Virologie am Department für Hygiene, Mikrobiologie und Public Health   | Bergthaler laboratory, CeMM Research Center for Molecular Medicine of the Austrian Academy of Sciences                                                                                                                                                                                                          | Alexandra Popa et al                                        |
| EPI_ISL_934544,EPI_ISL_934545                                                                                                                         | Institut für Virologie am Department für Hygiene, Mikrobiologie und Public Health   | Bergthaler laboratory, CeMM Research Center for Molecular Medicine of the Austrian Academy of Sciences                                                                                                                                                                                                          | Lukas Endler et al                                          |
| EPI_ISL_1141634                                                                                                                                       | Institut für Virologie des Universitätsklinikums Tübingen                           | Robert Koch Institute                                                                                                                                                                                                                                                                                           | et al                                                       |
| EPI_ISL_1293351                                                                                                                                       | Institut National d'Hygiène (INH)                                                   | Unité Mixte Internationale TransVIHMI (UMI 233 IRD – U1175 INSERM - Université de Montpellier)IRD (Institut de recherche pour le développement)                                                                                                                                                                 | Mounerou SALOU et al                                        |
| EPI_ISL_418208,EPI_ISL_420072,EPI_ISL_480787,EPI_ISL_482878,EPI_ISL_485710,EPI_ISL_486861,EPI_ISL_486862,EPI_ISL_486859,EPI_ISL_486872,EPI_ISL_486867 | Institut Pasteur Dakar                                                              | Institut Pasteur de Dakar                                                                                                                                                                                                                                                                                       | Ndongo Dia et al                                            |
| EPI_ISL_498232,EPI_ISL_498236,EPI_ISL_498238,EPI_ISL_498239,EPI_ISL_498251,EPI_ISL_498252                                                             | Institut Pasteur de Dakar                                                           | Institut Pasteur de Dakar                                                                                                                                                                                                                                                                                       | Ndongo Dia et al                                            |
| EPI_ISL_1013214,EPI_ISL_1013215,EPI_ISL_1013216,EPI_ISL_1013417,EPI_ISL_1013421,EPI_ISL_1013432                                                       | Institut Pasteur de Guadeloupe                                                      | National Reference Center for Viruses of Respiratory Infections, Institut Pasteur, Paris                                                                                                                                                                                                                        | Marion Barbet et al                                         |
| EPI_ISL_999032                                                                                                                                        | Institut Pasteur de Guinée                                                          | Institut Pasteur de Dakar                                                                                                                                                                                                                                                                                       | Grayo Solene et al                                          |

|                                                                                                                                                                                                                                                                                                                                 |                                                                                                                                |                                                                                                                                |                              |
|---------------------------------------------------------------------------------------------------------------------------------------------------------------------------------------------------------------------------------------------------------------------------------------------------------------------------------|--------------------------------------------------------------------------------------------------------------------------------|--------------------------------------------------------------------------------------------------------------------------------|------------------------------|
| EPI_ISL_613455,EPI_ISL_613456,EPI_ISL_613453,EPI_ISL_613454,EPI_ISL_613451,EPI_ISL_613452,EPI_ISL_613429,EPI_ISL_613442,EPI_ISL_613448,EPI_ISL_613449,EPI_ISL_613446,EPI_ISL_613440                                                                                                                                             | Institut Pasteur de la Guadeloupe                                                                                              | Institut Pasteur de la Guadeloupe                                                                                              | Marion Barbet et al          |
| EPI_ISL_459965,EPI_ISL_459966,EPI_ISL_459967,EPI_ISL_459973,EPI_ISL_459977,EPI_ISL_459983,EPI_ISL_459984                                                                                                                                                                                                                        | Institut Pasteur du Maroc                                                                                                      | Institut Pasteur du Maroc                                                                                                      | Marion Barbet et al          |
| EPI_ISL_1020296                                                                                                                                                                                                                                                                                                                 | Institute for Hygiene and Microbiology                                                                                         | Center for Virology                                                                                                            | Jeremy V. Campbell et al     |
| EPI_ISL_853784,EPI_ISL_853915                                                                                                                                                                                                                                                                                                   | Institute for Laboratory Diagnostics and Microbiology, Klinikum Klagenfurt am Worthersee                                       | Bergthaler laboratory, CeMM Research Center for Molecular Medicine of the Austrian Academy of Sciences                         | Lukas Endler et al           |
| EPI_ISL_933804                                                                                                                                                                                                                                                                                                                  | Institute for Lung Diseases in Children - Skopje                                                                               | Research Center for Genetic Engineering and Biotechnology Georgi D. Efremov", Macedonian Academy of Sciences and Arts"         | RCGEB - MASA et al           |
| EPI_ISL_490089,EPI_ISL_490101,EPI_ISL_490102,EPI_ISL_596449,EPI_ISL_718267,EPI_ISL_718271,EPI_ISL_718269,EPI_ISL_718272,EPI_ISL_718277,EPI_ISL_718278,EPI_ISL_718281,EPI_ISL_718280,EPI_ISL_718282,EPI_ISL_718284,EPI_ISL_877228,EPI_ISL_968089,EPI_ISL_1055262,EPI_ISL_1114721,EPI_ISL_1114722,EPI_ISL_1196866,EPI_ISL_1263460 | Institute for Medical Research, Infectious Disease Research Centre, National Institutes of Health, Ministry of Health Malaysia | Institute for Medical Research, Infectious Disease Research Centre, National Institutes of Health, Ministry of Health Malaysia | Suppiah J et al              |
| EPI_ISL_430442,EPI_ISL_430441                                                                                                                                                                                                                                                                                                   | Institute for Medical Research, Infectious Disease Research Centre, National Institutes of Health, Ministry of Health Malaysia | Institute for Medical Research, Infectious Disease Research Centre, National Institutes of Health, Ministry of Health Malaysia | Suppiah.J et al              |
| EPI_ISL_455790,EPI_ISL_455791,EPI_ISL_455792                                                                                                                                                                                                                                                                                    | Institute for Medical Research, Infectious Disease Research Centre, National Institutes of Health, Ministry of Health Malaysia | Malaysia Genome Institute                                                                                                      | Mohd Noor Mat Isa et al      |
| EPI_ISL_728561,EPI_ISL_733552,EPI_ISL_812954                                                                                                                                                                                                                                                                                    | Institute for Urban Disease Control and Prevention                                                                             | COVID-19 Network Investigations (CONI) Alliance                                                                                | Kamolthip Atsawawanunt et al |
| EPI_ISL_891270,EPI_ISL_891272                                                                                                                                                                                                                                                                                                   | Institute of Biocides and Medical Ecology, Belgrade, Serbia                                                                    | Virology department Institute of microbiology and immunology Faculty of Medicine University of Belgrade                        | Banko Ana et al              |
| EPI_ISL_1057036,EPI_ISL_1057038                                                                                                                                                                                                                                                                                                 | Institute of Biocides and Medical Ecology, Belgrade, Serbia                                                                    | Virology Department Institute of Microbiology and Immunology Faculty of Medicine University of Belgrade                        | Banko Ana et al              |
| EPI_ISL_600444,EPI_ISL_600476,EPI_ISL_600484,EPI_ISL_600512,EPI_ISL_600562                                                                                                                                                                                                                                                      | Institute of Epidemiology Disease Control And Research                                                                         | Institute for Developing Science and Health Initiatives                                                                        | Lauren Cowley et al          |
| EPI_ISL_877453,EPI_ISL_979251                                                                                                                                                                                                                                                                                                   | Institute of Microbiology and Immunology, Faculty of Medicine, University of Ljubljana                                         | Institute of Microbiology and Immunology, Faculty of Medicine, University of Ljubljana                                         | Samo Zakotnik et al          |
| EPI_ISL_635279                                                                                                                                                                                                                                                                                                                  | Institute of Microbiology and Immunology, Faculty of Medicine, University of Ljubljana                                         | Institute of Microbiology and Immunology, Faculty of Medicine, University of Ljubljana                                         | Tomaž Mark Zorec et al       |
| EPI_ISL_697787                                                                                                                                                                                                                                                                                                                  | Institute of Microbiology, Universidad San Francisco de Quito                                                                  | Institute of Microbiology, Universidad San Francisco de Quito                                                                  | Andrea Macias et al          |
| EPI_ISL_486844,EPI_ISL_491932,EPI_ISL_527809,EPI_ISL_527815,EPI_ISL_697785,EPI_ISL_697788,EPI_ISL_697799,EPI_ISL_697800,EPI_ISL_728205,EPI_ISL_824293                                                                                                                                                                           | Institute of Microbiology, Universidad San Francisco de Quito                                                                  | Institute of Microbiology, Universidad San Francisco de Quito                                                                  | Belén Prado-Vivar et al      |
| EPI_ISL_660529,EPI_ISL_660530,EPI_ISL_660537,EPI_ISL_728202                                                                                                                                                                                                                                                                     | Institute of Microbiology, Universidad San Francisco de Quito                                                                  | Institute of Microbiology, Universidad San Francisco de Quito                                                                  | Sully Márquez et al          |
| EPI_ISL_548944,EPI_ISL_548945,EPI_ISL_548942,EPI_ISL_548943,EPI_ISL_548946                                                                                                                                                                                                                                                      | Institute of Microbiology, University of Veterinary and Animal sciences                                                        | Institute of Microbiology, University of Veterinary and Animal sciences                                                        | Yaqub et al                  |

|                                                                                                                                                                 |                                                                                                                                                             |                                                                                                                                               |                                 |
|-----------------------------------------------------------------------------------------------------------------------------------------------------------------|-------------------------------------------------------------------------------------------------------------------------------------------------------------|-----------------------------------------------------------------------------------------------------------------------------------------------|---------------------------------|
| EPI_ISL_1233843,EPI_ISL_1233855                                                                                                                                 | Institute of Molecular and Translational Medicine / Laboratory of Experimental Medicine, Faculty of Medicine and Dentistry, Palacky University              | Institute of Molecular and Translational Medicine / Laboratory of Experimental Medicine                                                       | Rastislav Slavkovský et al      |
| EPI_ISL_577740,EPI_ISL_577742,EPI_ISL_583487,EPI_ISL_875518                                                                                                     | Institute of Virology, Biomedical Research Center of the Slovak Academy of Sciences, Bratislava                                                             | Faculty of Natural Sciences, Comenius University, Bratislava                                                                                  | Broňa Brejová et al             |
| EPI_ISL_577739,EPI_ISL_959621                                                                                                                                   | Institute of Virology, Biomedical Research Center of the Slovak Academy of Sciences, Bratislava                                                             | Faculty of Natural Sciences, Comenius University, Bratislava                                                                                  | Kristína Boršová et al          |
| EPI_ISL_779655,EPI_ISL_1234472                                                                                                                                  | Institute of Virology, Biomedical Research Center of the Slovak Academy of Sciences, Bratislava                                                             | Faculty of Natural Sciences, Comenius University, Bratislava                                                                                  | Viktória Čabanová et al         |
| EPI_ISL_577734,EPI_ISL_583481                                                                                                                                   | Institute of Virology, Biomedical Research Center of the Slovak Academy of Sciences, Bratislava                                                             | Faculty of Natural Sciences, Comenius University, Bratislava                                                                                  | Viktória Hodorová et al         |
| EPI_ISL_417877                                                                                                                                                  | Institute of Virology, Biomedical Research Center of the Slovak Academy of Sciences, Bratislava; Public Health Authority of the Slovak Republic, Bratislava | Institute of Virology, Biomedical Research Center of the Slovak Academy of Sciences, Bratislava; Comenius University Science Park, Bratislava | Monika Sláviková et al          |
| EPI_ISL_1017679,EPI_ISL_1017687,EPI_ISL_1017691                                                                                                                 | Institute of Virology, Vaccines and Sera "Torlak"                                                                                                           | Institute of microbiology and Immunology, Faculty of Medicine, University of Belgrade                                                         | Knezevic et al                  |
| EPI_ISL_658901                                                                                                                                                  | Instituto de Diagnostico y Referencia Epidemiologicos (INDRE)                                                                                               | Instituto de Diagnostico y Referencia Epidemiologicos (INDRE)                                                                                 | Ernesto Ramirez-Gonzalez et al  |
| EPI_ISL_493337,EPI_ISL_516618,EPI_ISL_516619                                                                                                                    | Instituto de Diagnostico y Referencia Epidemiologicos (INDRE)                                                                                               | Instituto de Diagnostico y Referencia Epidemiologicos (INDRE)                                                                                 | Gisela Barrera-Badillo et al    |
| EPI_ISL_455455                                                                                                                                                  | Instituto de Diagnostico y Referencia Epidemiologicos (INDRE)                                                                                               | Instituto de Diagnostico y Referencia Epidemiologicos (INDRE)                                                                                 | Rodriguez-Maldonado Abril et al |
| EPI_ISL_452139,EPI_ISL_452141                                                                                                                                   | Instituto de Diagnostico y Referencia Epidemiologicos (INDRE)                                                                                               | Instituto de diagnóstico y Referencia Epidemiologicos (INDRE)                                                                                 | Ramirez-Gonzalez Ernesto et al  |
| EPI_ISL_1060676,EPI_ISL_1060681,EPI_ISL_1060684,EPI_ISL_1060699,EPI_ISL_1060729                                                                                 | Instituto de Diagnostico y Referencia Epidemiologicos (INDRE)_RNLSP                                                                                         | Instituto de Diagnostico y Referencia Epidemiologicos (INDRE)                                                                                 | Claudia Wong-Arambula et al     |
| EPI_ISL_1301455,EPI_ISL_1301548,EPI_ISL_1301568,EPI_ISL_1301691                                                                                                 | Instituto de Diagnostico y Referencia Epidemiologicos InDRE_RNLSP                                                                                           | Instituto de Biotecnología de la UNAM                                                                                                         | Authors from IBT et al          |
| EPI_ISL_913945,EPI_ISL_913947,EPI_ISL_913967,EPI_ISL_913968,EPI_ISL_1054955,EPI_ISL_1054960,EPI_ISL_1168605,EPI_ISL_1168608,EPI_ISL_1168609,EPI_ISL_1219715     | Instituto de Diagnostico y Referencia Epidemiologicos INDRE_RNLSP                                                                                           | Instituto de Diagnostico y Referencia Epidemiologicos (INDRE)                                                                                 | Claudia Wong-Arambula et al     |
| EPI_ISL_491265                                                                                                                                                  | Instituto Gulbenkian de Ciência                                                                                                                             | Instituto Gulbenkian de Ciência                                                                                                               | Susana Ladeiro et al            |
| EPI_ISL_412972                                                                                                                                                  | Instituto Nacional de Enfermedades Respiratorias                                                                                                            | Instituto de Diagnostico y Referencia Epidemiologicos (INDRE)                                                                                 | Ramirez-Gonzalez Ernesto et al  |
| EPI_ISL_1301453,EPI_ISL_1302180,EPI_ISL_1302205,EPI_ISL_1302250,EPI_ISL_1302263,EPI_ISL_1302269,EPI_ISL_1302292,EPI_ISL_1302298,EPI_ISL_1302345,EPI_ISL_1302381 | Instituto Nacional de Enfermedades Respiratorias (INER)                                                                                                     | Instituto de Biotecnología de la UNAM                                                                                                         | Authors from IBT et al          |
| EPI_ISL_837610,EPI_ISL_837613,EPI_ISL_837734                                                                                                                    | Instituto Nacional de Enfermedades Respiratorias (INER)                                                                                                     | Instituto Nacional de Enfermedades Respiratorias (INER)                                                                                       | Celia Boukadida et al           |
| EPI_ISL_574294                                                                                                                                                  | Instituto Nacional de Investigacion en Salud Pública                                                                                                        | Instituto Nacional de Investigación en Salud Pública                                                                                          | Leandro Patino Patino et al     |
| EPI_ISL_574293                                                                                                                                                  | Instituto Nacional de Investigación en Salud Pública                                                                                                        | Instituto Nacional de Investigación en Salud Pública                                                                                          | Leandro Patino Patino et al     |
| EPI_ISL_491944,EPI_ISL_491945,EPI_ISL_491946,EPI_ISL_491947,EPI_ISL_491950                                                                                      | Instituto Nacional de Investigación en Salud Pública - INSPI                                                                                                | INSPI - Charité                                                                                                                               | Alfredo Bruno Caicedo et al     |

|                                                                                                                                                                                                                                                   |                                                                                                                                                                                                                           |                                                                                                                                                                                                                                                         |                                |
|---------------------------------------------------------------------------------------------------------------------------------------------------------------------------------------------------------------------------------------------------|---------------------------------------------------------------------------------------------------------------------------------------------------------------------------------------------------------------------------|---------------------------------------------------------------------------------------------------------------------------------------------------------------------------------------------------------------------------------------------------------|--------------------------------|
| EPI_ISL_933515,EPI_ISL_955190,EPI_ISL_1005569,EPI_ISL_1181706,EPI_ISL_1205214,EPI_ISL_1262637,EPI_ISL_1262646,EPI_ISL_1262647,EPI_ISL_1262652,EPI_ISL_1262657,EPI_ISL_1262667,EPI_ISL_1262668,EPI_ISL_1262673,EPI_ISL_1262674                     | Instituto Nacional de Medicina Genomica                                                                                                                                                                                   | Instituto Nacional de Medicina Genomica                                                                                                                                                                                                                 | Hidalgo-Miranda A et al        |
| EPI_ISL_418262                                                                                                                                                                                                                                    | Instituto Nacional de Salud                                                                                                                                                                                               | Instituto Nacional de Salud Universidad Cooperativa de Colombia Instituto Alexander von Humboldt Imperial College-London London School of Hygiene & Tropical Medicine                                                                                   | Marcela Mercado-Reyes et al    |
| EPI_ISL_536477,EPI_ISL_536485,EPI_ISL_536492,EPI_ISL_536552                                                                                                                                                                                       | Instituto Nacional de Salud                                                                                                                                                                                               | Laboratorio de Infecciones Respiratorias Agudas                                                                                                                                                                                                         | Eduardo Juscamayta Lopez et al |
| EPI_ISL_456139,EPI_ISL_456142,EPI_ISL_456156                                                                                                                                                                                                      | Instituto Nacional de Salud - Unidad de Secuenciación y Análisis Genómico                                                                                                                                                 | Instituto Nacional de Salud, Universidad Cooperativa de Colombia, Instituto Alexander von Humboldt, Imperial College-London, London School of Hygiene & Tropical Medicine                                                                               | Katherine Laiton-Donato et al  |
| EPI_ISL_941955,EPI_ISL_941986                                                                                                                                                                                                                     | Instituto Nacional de Salud, Bogotá, Colombia                                                                                                                                                                             | Centro de Investigaciones en Microbiología y Biotecnología-UR (CIMBIUR), Facultad de Ciencias Naturales, Universidad del Rosario, Bogotá, Colombia Instituto Nacional de Salud, Bogotá, Colombia Icahn School of Medicine at Mount Sinai, New York, USA | Luz Helena Patiño et al        |
| EPI_ISL_526932,EPI_ISL_526956,EPI_ISL_526971,EPI_ISL_526969,EPI_ISL_526967,EPI_ISL_653746,EPI_ISL_653754,EPI_ISL_653758,EPI_ISL_653759,EPI_ISL_653760,EPI_ISL_653762,EPI_ISL_739663,EPI_ISL_739672,EPI_ISL_739674,EPI_ISL_739675,EPI_ISL_739677   | Instituto Nacional de Salud, Bogotá, Colombia                                                                                                                                                                             | Instituto Nacional de Salud, Bogotá, Colombia                                                                                                                                                                                                           | Katherine Laiton-Donato et al  |
| EPI_ISL_887420,EPI_ISL_887421,EPI_ISL_887424,EPI_ISL_887426,EPI_ISL_887429,EPI_ISL_887430,EPI_ISL_887434,EPI_ISL_887467,EPI_ISL_887473,EPI_ISL_887481,EPI_ISL_887490,EPI_ISL_887500,EPI_ISL_887503,EPI_ISL_964918,EPI_ISL_1132837,EPI_ISL_1132838 | Instituto Nacional de Saude (INS), Mozambique                                                                                                                                                                             | KRISP, KZN Research Innovation and Sequencing Platform                                                                                                                                                                                                  | Nalia Ismael et al             |
| EPI_ISL_511044,EPI_ISL_693628,EPI_ISL_861567,EPI_ISL_1023463,EPI_ISL_1170140,EPI_ISL_1260855                                                                                                                                                      | Instituto Nacional de Saude (INSA)                                                                                                                                                                                        | Instituto Nacional de Saude (INSA)                                                                                                                                                                                                                      | Borges et al et al             |
| EPI_ISL_941739                                                                                                                                                                                                                                    | Instituto Nacional de Saude (INSA) and Instituto Gulbenkian de Ciencia (IGC)                                                                                                                                              | Instituto Nacional de Saude (INSA) and Instituto Gulbenkian de Ciencia (IGC)                                                                                                                                                                            | Borges et al et al             |
| EPI_ISL_1167134,EPI_ISL_1167135,EPI_ISL_1167138,EPI_ISL_1167145,EPI_ISL_1167148,EPI_ISL_1167160,EPI_ISL_1167161,EPI_ISL_1167164,EPI_ISL_1167171,EPI_ISL_1167181                                                                                   | Iressef Genomics lab                                                                                                                                                                                                      | L'institut de Recherche en Santé, de Surveillance Épidémiologique et de Formation (IRESSEF)                                                                                                                                                             | Souleymane MBOUP et al         |
| EPI_ISL_956386,EPI_ISL_956387                                                                                                                                                                                                                     | Isolation - Virology Unit, Institut Pasteur du Cambodge; Sequencing - US National Institute of Allergy and Infectious Diseases Cambodia, US Naval Medical Research Unit -2, Cambodia National Institute for Public Health | Virology Unit, Institut Pasteur du Cambodge                                                                                                                                                                                                             | Vireak Heang et al             |

|                                                                                                                                                                                                                                                                               |                                                                                                                                                                                                                                                                                       |                                                                                                                                                                                            |                              |
|-------------------------------------------------------------------------------------------------------------------------------------------------------------------------------------------------------------------------------------------------------------------------------|---------------------------------------------------------------------------------------------------------------------------------------------------------------------------------------------------------------------------------------------------------------------------------------|--------------------------------------------------------------------------------------------------------------------------------------------------------------------------------------------|------------------------------|
| EPI_ISL_474959,EPI_ISL_474961,EPI_ISL_474977,EPI_ISL_475017,EPI_ISL_514301,EPI_ISL_514302,EPI_ISL_516889,EPI_ISL_516895,EPI_ISL_516897,EPI_ISL_516899,EPI_ISL_516905,EPI_ISL_516913,EPI_ISL_516920,EPI_ISL_575333,EPI_ISL_575332,EPI_ISL_649072,EPI_ISL_649084,EPI_ISL_649094 | Israel Central Virology laboratory                                                                                                                                                                                                                                                    | Israel Central Virology laboratory                                                                                                                                                         | Neta Zuckerman et al         |
| EPI_ISL_804057,EPI_ISL_889144,EPI_ISL_944237,EPI_ISL_944240,EPI_ISL_1073390,EPI_ISL_1073394,EPI_ISL_1209487,EPI_ISL_1240651                                                                                                                                                   | Israel Central Virology laboratory                                                                                                                                                                                                                                                    | Israel National Consortium for SARS-CoV-2 sequencing                                                                                                                                       | Neta Zuckerman et al         |
| EPI_ISL_1240647,EPI_ISL_1240648                                                                                                                                                                                                                                               | Israel Central Virology Laboratory                                                                                                                                                                                                                                                    | Israel National Consortium for SARS-CoV-2 sequencing                                                                                                                                       | Neta Zuckerman et al         |
| EPI_ISL_594159,EPI_ISL_594160                                                                                                                                                                                                                                                 | Israel Institute for Biological Research                                                                                                                                                                                                                                              | Israel Institute for Biological Research                                                                                                                                                   | Galia Zaide et al            |
| EPI_ISL_778697                                                                                                                                                                                                                                                                | Istituto Zooprofilattico Sperimentale del Mezzogiorno                                                                                                                                                                                                                                 | TIGEM                                                                                                                                                                                      | Antonio Grimaldi et al       |
| EPI_ISL_525566                                                                                                                                                                                                                                                                | Istituto Zooprofilattico Sperimentale Puglia e Basilicata; Dipartimento di Bioscienze, Biotecnologie e Biofarmaceutica dell'Università degli Studi di Bari "A.Moro"; Istituto di Biomembrane. Bioenergetica e Biotecnologie Molecolari del Consiglio Nazionale delle Ricerche di Bari | Beaconlab (Bioinformatics, Evolution and Comparative Genomics lab), Dept of Biosciences, University on Milan                                                                               | Parisi A. et al              |
| EPI_ISL_1086090                                                                                                                                                                                                                                                               | IZSM                                                                                                                                                                                                                                                                                  | TIGEM                                                                                                                                                                                      | Antonio Grimaldi et al       |
| EPI_ISL_422424                                                                                                                                                                                                                                                                | Jaber Al Ahmad Al Sabah Hospital                                                                                                                                                                                                                                                      | Dasman diabetes Institute                                                                                                                                                                  | Fahd Al-Mulla et al          |
| EPI_ISL_422426,EPI_ISL_422427                                                                                                                                                                                                                                                 | JABER AL AHMAD AL SABAH HOSPITAL – KUWAIT CITY                                                                                                                                                                                                                                        | Dasman Diabetes Institute                                                                                                                                                                  | Fahd Al-Mulla et al          |
| EPI_ISL_450797,EPI_ISL_450799                                                                                                                                                                                                                                                 | Jamaica Ministry of Health and Wellness                                                                                                                                                                                                                                               | Pathogen Discovery, Respiratory Viruses Branch, Division of Viral Diseases, Centers for Disease Control and Prevention                                                                     | Yan Li et al                 |
| EPI_ISL_779290,EPI_ISL_779255,EPI_ISL_779277,EPI_ISL_779274,EPI_ISL_779273,EPI_ISL_779278,EPI_ISL_779279,EPI_ISL_779286,EPI_ISL_779283,EPI_ISL_779261,EPI_ISL_779284,EPI_ISL_779269,EPI_ISL_779289                                                                            | Jamil-ur-Rahman Center for Genome Research, Dr. Panjwani Center for Molecular Medicine and Drug Research                                                                                                                                                                              | Jamil-ur-Rahman Center for Genome Research, Dr. Panjwani Center for Molecular Medicine and Drug Research                                                                                   | Shakeel et al                |
| EPI_ISL_451958                                                                                                                                                                                                                                                                | Jamil-ur-Rahman Center for Genome Research, Dr. Panjwani Center for Molecular Medicine and Drug Research, International Center for Chemical and Biological Sciences, University of Karachi                                                                                            | Jamil-ur-Rahman Center for Genome Research, Dr. Panjwani Center for Molecular Medicine and Drug Research, International Center for Chemical and Biological Sciences, University of Karachi | Shakeel et al                |
| EPI_ISL_416623,EPI_ISL_416618                                                                                                                                                                                                                                                 | Japanese Quarantine Stations                                                                                                                                                                                                                                                          | Pathogen Genomics Center, National Institute of Infectious Diseases                                                                                                                        | Tsuyoshi Sekizuka et al      |
| EPI_ISL_495435                                                                                                                                                                                                                                                                | Kafkas University, Faculty of Medicine, Department of Medical Microbiology                                                                                                                                                                                                            | Kafkas University, Faculty of Medicine, Department of Medical Microbiology                                                                                                                 | Murat Karamese et al         |
| EPI_ISL_534235                                                                                                                                                                                                                                                                | Karolinska universitetslaboratoriet SOLNA                                                                                                                                                                                                                                             | The Public Health Agency of Sweden                                                                                                                                                         | Anna-Malin Linde et al       |
| EPI_ISL_457855,EPI_ISL_457890                                                                                                                                                                                                                                                 | KEMRI-CGMR-C                                                                                                                                                                                                                                                                          | KEMRI-Wellcome Trust Research Programme/KEMRI-CGMR-C Kilifi                                                                                                                                | Githinji G. et al 2020 et al |
| EPI_ISL_568699,EPI_ISL_568710,EPI_ISL_568734,EPI_ISL_568813,EPI_ISL_568819,EPI_ISL_568860,EPI_ISL_568866,EPI_ISL_568867                                                                                                                                                       | KEMRI-Wellcome Trust Research Programme/KEMRI-CGMR-C Kilifi                                                                                                                                                                                                                           | KEMRI-Wellcome Trust Research Programme/KEMRI-CGMR-C Kilifi                                                                                                                                | Githinji et al 2020 et al    |

|                                                                                                                                                                                                                                                                                                                                                                                                                                                                                                   |                                                                                                                                       |                                                                                                                                       |                                  |
|---------------------------------------------------------------------------------------------------------------------------------------------------------------------------------------------------------------------------------------------------------------------------------------------------------------------------------------------------------------------------------------------------------------------------------------------------------------------------------------------------|---------------------------------------------------------------------------------------------------------------------------------------|---------------------------------------------------------------------------------------------------------------------------------------|----------------------------------|
| EPI_ISL_806570,EPI_ISL_806575,EPI_ISL_806611,EPI_ISL_806617,EPI_ISL_806623,EPI_ISL_806624,EPI_ISL_806662,EPI_ISL_806663,EPI_ISL_806670,EPI_ISL_806681,EPI_ISL_806703,EPI_ISL_806704,EPI_ISL_806705,EPI_ISL_806706,EPI_ISL_806710,EPI_ISL_806711,EPI_ISL_806712,EPI_ISL_855535,EPI_ISL_855534,EPI_ISL_969074,EPI_ISL_969001,EPI_ISL_969004,EPI_ISL_969027,EPI_ISL_968858,EPI_ISL_968986,EPI_ISL_968869,EPI_ISL_968873,EPI_ISL_968910,EPI_ISL_968850,EPI_ISL_968810,EPI_ISL_1039228,EPI_ISL_1039229 | KEMRI-Wellcome Trust Research Programme/KEMRI-CGMR-C Kilifi                                                                           | KEMRI-Wellcome Trust Research Programme/KEMRI-CGMR-C Kilifi                                                                           | Githinji et al et al             |
| EPI_ISL_512811,EPI_ISL_512812,EPI_ISL_512815                                                                                                                                                                                                                                                                                                                                                                                                                                                      | Kenema Government Hospital, Ministry of Health and Sanitation                                                                         | Kenema Government Hospital, Ministry of Health and Sanitation                                                                         | Goba et al                       |
| EPI_ISL_1239480                                                                                                                                                                                                                                                                                                                                                                                                                                                                                   | Kimberley Hospital, National Health Laboratory Services, Northern Cape, South Africa                                                  | National Institute for Communicable Diseases of the National Health Laboratory Service                                                | Amoako DG et al                  |
| EPI_ISL_490007,EPI_ISL_490008                                                                                                                                                                                                                                                                                                                                                                                                                                                                     | King Fahad Medical City                                                                                                               | King Fahad Medical City                                                                                                               | Alosaimi et al                   |
| EPI_ISL_516946,EPI_ISL_516967                                                                                                                                                                                                                                                                                                                                                                                                                                                                     | King Georges Medical University                                                                                                       | CSIR-National Botanical Research Institute                                                                                            | Priti Prasad et al               |
| EPI_ISL_458032                                                                                                                                                                                                                                                                                                                                                                                                                                                                                    | King Institute of Preventive Medicine & Research                                                                                      | CSIR-Centre for Cellular and Molecular Biology                                                                                        | K.Kaveri et al                   |
| EPI_ISL_483543,EPI_ISL_483545,EPI_ISL_483546,EPI_ISL_483549,EPI_ISL_483553,EPI_ISL_483564                                                                                                                                                                                                                                                                                                                                                                                                         | Kingdom of Bahrein Ministry of Health                                                                                                 | Erasmus Medical Center                                                                                                                | Bas Oude Munnink et al           |
| EPI_ISL_833390                                                                                                                                                                                                                                                                                                                                                                                                                                                                                    | Klinik Apotek Dein, Jakarta, Indonesia                                                                                                | Biosafety Level-3 Laboratory, Indonesian Institute of Sciences (LIPI)                                                                 | Andri Wardiana et al             |
| EPI_ISL_833389,EPI_ISL_833388                                                                                                                                                                                                                                                                                                                                                                                                                                                                     | Klinik Apotek Dein, Jakarta, Indonesia                                                                                                | Biosafety Level-3 Laboratory, Indonesian Institute of Sciences (LIPI)                                                                 | Syam Budi Iryanto et al          |
| EPI_ISL_654946,EPI_ISL_934334                                                                                                                                                                                                                                                                                                                                                                                                                                                                     | Klinisk mikrobiologi                                                                                                                  | The Public Health Agency of Sweden                                                                                                    | Anna-Malin Linde et al           |
| EPI_ISL_766696                                                                                                                                                                                                                                                                                                                                                                                                                                                                                    | Klinisk Mikrobiologi                                                                                                                  | The Public Health Agency of Sweden                                                                                                    | Department of Microbiology et al |
| EPI_ISL_984963,EPI_ISL_1091567                                                                                                                                                                                                                                                                                                                                                                                                                                                                    | Klinisk mikrobiologi, Region Västerbotten                                                                                             | CBRN Defence and Security, Swedish Defence Research Agency                                                                            | Andreas Sjödin et al             |
| EPI_ISL_534245                                                                                                                                                                                                                                                                                                                                                                                                                                                                                    | Kliniskt mikrobiologiska laboratoriet                                                                                                 | The Public Health Agency of Sweden                                                                                                    | Anna-Malin Linde et al           |
| EPI_ISL_582774                                                                                                                                                                                                                                                                                                                                                                                                                                                                                    | Klinisk mikrobiologi Linköping                                                                                                        | The Public Health Agency of Sweden                                                                                                    | Anna-Malin Linde et al           |
| EPI_ISL_407193                                                                                                                                                                                                                                                                                                                                                                                                                                                                                    | Korea Centers for Disease Control & Prevention (KCDC) Center for Laboratory Control of Infectious Diseases Division of Viral Diseases | Korea Centers for Disease Control & Prevention (KCDC) Center for Laboratory Control of Infectious Diseases Division of Viral Diseases | Jeong-Min Kim et al              |
| EPI_ISL_436684,EPI_ISL_455639                                                                                                                                                                                                                                                                                                                                                                                                                                                                     | KRISP, KZN Research Innovation and Sequencing Platform                                                                                | KRISP, KZN Research Innovation and Sequencing Platform                                                                                | Giandhari J et al                |
| EPI_ISL_888702,EPI_ISL_888707,EPI_ISL_888716,EPI_ISL_888718,EPI_ISL_888721,EPI_ISL_1049150,EPI_ISL_1049151,EPI_ISL_1049173,EPI_ISL_1048849                                                                                                                                                                                                                                                                                                                                                        | KU Leuven, Rega Institute, Clinical and Epidemiological Virology                                                                      | KU Leuven, Rega Institute, Clinical and Epidemiological Virology                                                                      | Tony Wawina-Bokalanga et al      |
| EPI_ISL_475569                                                                                                                                                                                                                                                                                                                                                                                                                                                                                    | Kungsholmsdoktor                                                                                                                      | The Public Health Agency of Sweden                                                                                                    | Oskar Karlsson Lindsjö et al     |
| EPI_ISL_747239                                                                                                                                                                                                                                                                                                                                                                                                                                                                                    | Kuningan Public Health Office                                                                                                         | West Java Health Laboratory; School of Life Sciences and Technology, Institut Teknologi Bandung                                       | Azzania Fibriani et al           |
| EPI_ISL_982262                                                                                                                                                                                                                                                                                                                                                                                                                                                                                    | Lab voor klinische biologie                                                                                                           | Lab voor klinische biologie                                                                                                           | Hannelore Hamerlinck et al       |
| EPI_ISL_717616                                                                                                                                                                                                                                                                                                                                                                                                                                                                                    | Lab voor klinische biologie                                                                                                           | Onderzoeksgroep Virologie                                                                                                             | Laurens Lambrechts et al         |
| EPI_ISL_717618                                                                                                                                                                                                                                                                                                                                                                                                                                                                                    | Lab voor klinische biologie                                                                                                           | Onderzoeksgroep Virologie                                                                                                             | Nick Vereecke et al              |
| EPI_ISL_1154656                                                                                                                                                                                                                                                                                                                                                                                                                                                                                   | LabKom - Labor Augsburg MVZ GmbH                                                                                                      | Robert Koch Institute                                                                                                                 | et al                            |



|                                                                                                                                                                                                                                                                                                                                                          |                                                                                                      |                                                                                                                                                                       |                                 |
|----------------------------------------------------------------------------------------------------------------------------------------------------------------------------------------------------------------------------------------------------------------------------------------------------------------------------------------------------------|------------------------------------------------------------------------------------------------------|-----------------------------------------------------------------------------------------------------------------------------------------------------------------------|---------------------------------|
| EPI_ISL_1156681                                                                                                                                                                                                                                                                                                                                          | LabKom - MVZ Labor Bochum MLB GmbH                                                                   | Robert Koch Institute                                                                                                                                                 | et al                           |
| EPI_ISL_955071,EPI_ISL_955086                                                                                                                                                                                                                                                                                                                            | Labo analyses Med                                                                                    | National Reference Center for Viruses of Respiratory Infections, Institut Pasteur, Paris                                                                              | Marion Barbet et al             |
| EPI_ISL_872258,EPI_ISL_872259,EPI_ISL_890353,EPI_ISL_935643,EPI_ISL_954092,EPI_ISL_1060400,EPI_ISL_1111064,EPI_ISL_1201521,EPI_ISL_1233246,EPI_ISL_1259298,EPI_ISL_1262787,EPI_ISL_1262803,EPI_ISL_1263007                                                                                                                                               | Labo Analyses Med                                                                                    | National Reference Center for Viruses of Respiratory Infections, Institut Pasteur, Paris                                                                              | Marion Barbet et al             |
| EPI_ISL_1146104,EPI_ISL_1154843,EPI_ISL_1211236                                                                                                                                                                                                                                                                                                          | Labor Dr. Schumacher MVZ                                                                             | Robert Koch Institute                                                                                                                                                 | et al                           |
| EPI_ISL_775226,EPI_ISL_775220,EPI_ISL_775260                                                                                                                                                                                                                                                                                                             | Laboratoire Biolife                                                                                  | Laboratoire de Biotechnologie                                                                                                                                         | Mouna Ouadghiri et al           |
| EPI_ISL_1116592,EPI_ISL_1116470,EPI_ISL_1120732                                                                                                                                                                                                                                                                                                          | Laboratoire central de Virologie                                                                     | Laboratoire de Biotechnologie                                                                                                                                         | Hakima Kabbaj et al             |
| EPI_ISL_1103576,EPI_ISL_1137621                                                                                                                                                                                                                                                                                                                          | Laboratoire central de Virologie                                                                     | Laboratoire de Biotechnologie                                                                                                                                         | Myriam Sefrar et al             |
| EPI_ISL_660446,EPI_ISL_660450,EPI_ISL_660451,EPI_ISL_660452,EPI_ISL_660465,EPI_ISL_660467,EPI_ISL_660471,EPI_ISL_660473,EPI_ISL_660474,EPI_ISL_660477,EPI_ISL_660478,EPI_ISL_660479,EPI_ISL_660493,EPI_ISL_660495,EPI_ISL_660498,EPI_ISL_660503,EPI_ISL_660504,EPI_ISL_660515,EPI_ISL_660516,EPI_ISL_660519,EPI_ISL_660521,EPI_ISL_660522,EPI_ISL_660525 | Laboratoire de Microbiologie CHU Soro Sanou                                                          | Centre Muraz                                                                                                                                                          | Abdoul-Salam Ouedraogo et al    |
| EPI_ISL_1116468,EPI_ISL_1116467,EPI_ISL_1116464,EPI_ISL_1116469,EPI_ISL_1118884                                                                                                                                                                                                                                                                          | Laboratoire de Microbiologie- CHU Habib Bourguiba – Sfax                                             | Laboratoire des Procédés de Criblage Moléculaire et Cellulaire-Centre de Biotechnologie de Sfax                                                                       | Souissi et al                   |
| EPI_ISL_712062,EPI_ISL_712063                                                                                                                                                                                                                                                                                                                            | Laboratoire de Microbiologie- CHU Habib Bourguiba – Sfax adresse                                     | Laboratoire des Procédés de Criblage Moléculaire et Cellulaire-Centre de Biotechnologie de Sfax                                                                       | Souissi et al                   |
| EPI_ISL_476026                                                                                                                                                                                                                                                                                                                                           | Laboratoire de Recherche et d'Analyses Médicales de la Gendarmerie Royale                            | Laboratoire de Recherche et d'Analyses Médicales de la Gendarmerie Royale                                                                                             | Sanaâ Lemriss et al             |
| EPI_ISL_826123,EPI_ISL_826125                                                                                                                                                                                                                                                                                                                            | Laboratoire de santé publique du Québec                                                              | Laboratoire de santé publique du Québec                                                                                                                               | Sandrine Moreira et al          |
| EPI_ISL_1197037,EPI_ISL_1208399                                                                                                                                                                                                                                                                                                                          | Laboratoire de virologie clinique - Institut Pasteur de Tunis                                        | 1-Laboratory of Microbiology, National Reference Lab, Charles Nicolle Hospital; 2-University of Tunis ElManar, Faculty of Medicine of Tunis, LR99ES09, Tunis, Tunisia | Sameh Trabelsi et al            |
| EPI_ISL_414600                                                                                                                                                                                                                                                                                                                                           | Laboratoire de Virologie Institut de Virologie - INSERM U 1109 Hôpitaux Universitaires de Strasbourg | National Reference Center for Viruses of Respiratory Infections, Institut Pasteur, Paris                                                                              | Méline Albert et al             |
| EPI_ISL_666870                                                                                                                                                                                                                                                                                                                                           | Laboratoire de Virologie, CHU de Caen, Normandie, France.                                            | GRAM2.0, Université de Caen Normandie                                                                                                                                 | Meriadeg LE GUIL et al          |
| EPI_ISL_476823,EPI_ISL_476824,EPI_ISL_476825,EPI_ISL_476828,EPI_ISL_476830                                                                                                                                                                                                                                                                               | Laboratoire des Fièvres Hémorragiques Virales du Benin                                               | Charité-Universitätsmedizin Berlin                                                                                                                                    | Yadouleton et al                |
| EPI_ISL_629082                                                                                                                                                                                                                                                                                                                                           | Laboratoire du Centre Hospitalier Anecy Genevois                                                     | CNR Virus des Infections Respiratoires - France SUD                                                                                                                   | Antonin Bal et al               |
| EPI_ISL_910350,EPI_ISL_910352,EPI_ISL_910445,EPI_ISL_910650,EPI_ISL_910909,EPI_ISL_911130,EPI_ISL_911138,EPI_ISL_911234                                                                                                                                                                                                                                  | Laboratoire national de sante, Microbiology, Virology                                                | Laboratoire national de sante, Microbiology, Microbial Genomics Platform                                                                                              | Anke Wienecke-Baldacchino et al |
| EPI_ISL_429721                                                                                                                                                                                                                                                                                                                                           | Laboratoire National de Sante, Microbiology, Virology                                                | Laboratoire National de Sante, Microbiology, Epidemiology and Microbial Genomics                                                                                      | Anke Wienecke-Baldacchino et al |
| EPI_ISL_744295                                                                                                                                                                                                                                                                                                                                           | Laboratoire national de santé, Microbiology, Virology                                                | Laboratoire national de santé, Microbiology, Epidemiology and Microbial Genomics                                                                                      | Anke Wienecke-Baldacchino et al |

|                                                                                                                                                                      |                                                                                                                                                        |                                                                                                                                                                                                     |                                                                                                                           |
|----------------------------------------------------------------------------------------------------------------------------------------------------------------------|--------------------------------------------------------------------------------------------------------------------------------------------------------|-----------------------------------------------------------------------------------------------------------------------------------------------------------------------------------------------------|---------------------------------------------------------------------------------------------------------------------------|
| EPI_ISL_739733,EPI_ISL_740092,EPI_ISL_740127,EPI_ISL_755589                                                                                                          | Laboratoire national de santé, Microbiology, Virology                                                                                                  | Laboratoire national de santé, Microbiology, Microbial Genomics Platform                                                                                                                            | Anke Wienecke-Baldacchino et al                                                                                           |
| EPI_ISL_1265882                                                                                                                                                      | LABORATOIRE ORIADE                                                                                                                                     | CNR Virus des Infections Respiratoires - France SUD                                                                                                                                                 | Antonin Bal et al                                                                                                         |
| EPI_ISL_1288162                                                                                                                                                      | Laboratorio Central de Epidemiología (LCE)                                                                                                             | Instituto de Biotecnología de la UNAM                                                                                                                                                               | Consorcio Mexicano de Vigilancia Genómica (CoViGen-Mex). Authors (in alphabetical order): Julio Elias Alvarado-Yaah et al |
| EPI_ISL_1287776                                                                                                                                                      | Laboratorio Central de Epidemiología (LCE)                                                                                                             | Instituto Nacional de Enfermedades Respiratorias (INER): Centro de Investigación en Enfermedades Infecciosas (CIENI)                                                                                | Consorcio Mexicano de Vigilancia Genómica (CoViGen-Mex). Authors (in alphabetical order): Julio Elias Alvarado-Yaah et al |
| EPI_ISL_792512                                                                                                                                                       | Laboratorio Central de la Ciudad de Santa Fe                                                                                                           | Grupo de Genómica y Bioinformática del Instituto de Investigación de la Cadena Láctea CONICET-INTA on behalf of 'Proyecto Argentino Interinstitucional de genómica de SARS-CoV-2' (PAIS Consortium) | Eberhardt et al                                                                                                           |
| EPI_ISL_1239121                                                                                                                                                      | Laboratório Central de Saúde Pública do Espírito Santo                                                                                                 | Coordenação Geral de Laboratórios de Saúde Pública (CGLAB)                                                                                                                                          | Vagner Fonseca et al et al                                                                                                |
| EPI_ISL_792636                                                                                                                                                       | Laboratório Central de Saúde Pública do Estado da Paraíba (LACEN-PB)                                                                                   | Laboratory of Respiratory Viruses and Measles, Oswaldo Cruz Institute, FIOCRUZ                                                                                                                      | Paola Resende et al                                                                                                       |
| EPI_ISL_415128                                                                                                                                                       | Laboratório Central de Saúde Pública do Estado do Espírito Santo (LACEN-ES)                                                                            | Laboratory of Respiratory Viruses and Measles, Oswaldo Cruz Institute, FIOCRUZ                                                                                                                      | Paola Resende et al                                                                                                       |
| EPI_ISL_1181353                                                                                                                                                      | Laboratorio Central de Saude Publica do Estado do Rio de Janeiro (LACEN-RJ)                                                                            | Laboratory of Respiratory Viruses and Measles, Oswaldo Cruz Institute, FIOCRUZ                                                                                                                      | Paola Resende et al                                                                                                       |
| EPI_ISL_792529,EPI_ISL_792530,EPI_ISL_792537                                                                                                                         | Laboratorio Central, Ministerio de Salud Córdoba                                                                                                       | Instituto de Patología Vegetal (CIAP-INTA) on behalf of 'Proyecto Argentino Interinstitucional de genómica de SARS-CoV-2' (PAIS Consortium)                                                         | Fernández et al                                                                                                           |
| EPI_ISL_1196432                                                                                                                                                      | LABORATORIO CLINICO LABIN                                                                                                                              | Incienza, Instituto Costarricense de Investigación y Enseñanza en Nutrición y Salud                                                                                                                 | Francisco Duarte et al                                                                                                    |
| EPI_ISL_480321                                                                                                                                                       | Laboratorio Clínico San José                                                                                                                           | Charité Virology-University of Costa Rica                                                                                                                                                           | Andres Moreira-Soto et al                                                                                                 |
| EPI_ISL_755301,EPI_ISL_755303                                                                                                                                        | Laboratorio de Bioingeniería, Instituto de Ciencias de la Ingeniería, Universidad de O'Higgins                                                         | Center for Mathematical Modeling and Center for Genome Regulation. Santiago, Chile                                                                                                                  | M. Latorre et al                                                                                                          |
| EPI_ISL_457953,EPI_ISL_457957,EPI_ISL_457962,EPI_ISL_457963,EPI_ISL_457964,EPI_ISL_457967,EPI_ISL_457968,EPI_ISL_457969,EPI_ISL_457971,EPI_ISL_457973,EPI_ISL_480429 | Laboratorio de Biología Molecular Asociación Española Primera en Salud                                                                                 | Departments of Pathology and Medicine, New York University School of Medicine                                                                                                                       | Maria Victoria Elizondo et al                                                                                             |
| EPI_ISL_842652                                                                                                                                                       | Laboratorio de Biología Molecular Hospital Pedro de Elizalde                                                                                           | Grupo de Genómica y Bioinformática del Instituto de Investigación de la Cadena Láctea CONICET-INTA on behalf of 'Proyecto Argentino Interinstitucional de genómica de SARS-CoV-2' (PAIS Consortium) | Amadio et al                                                                                                              |
| EPI_ISL_468755,EPI_ISL_468756                                                                                                                                        | Laboratorio de Biología Molecular, Facultad de Medicina, Universidad de Atacama                                                                        | Center for Mathematical Modeling and Center for Genome Regulation. Santiago, Chile                                                                                                                  | Gaete A et al                                                                                                             |
| EPI_ISL_626560                                                                                                                                                       | Laboratorio de Biología Molecular, Facultad de Medicina, Universidad de Atacama, Copiapo, Chile/ FONDAP CRG, Universidad Andrés Bello, Santiago, Chile | Center for Mathematical Modeling and Center for Genome Regulation. Santiago, Chile                                                                                                                  | Echeverría C et al                                                                                                        |
| EPI_ISL_1278277                                                                                                                                                      | Laboratorio de Biología Molecular, Hospital San Pedro Claver                                                                                           | Molecular Genetics Laboratory, Instituto de Investigaciones Químicas, Universidad Mayor de San Andrés                                                                                               | Oscar M. Rollano-Peñaloza et al                                                                                           |
| EPI_ISL_1278281,EPI_ISL_1278284                                                                                                                                      | Laboratorio de Biología Molecular, SEDES-Potosí                                                                                                        | Molecular Genetics Laboratory, Instituto de Investigaciones Químicas, Universidad Mayor de San Andrés                                                                                               | Oscar M. Rollano-Peñaloza et al                                                                                           |

|                                                                                                                                                                                              |                                                                                                                                                                           |                                                                                                                                                                                                 |                                   |
|----------------------------------------------------------------------------------------------------------------------------------------------------------------------------------------------|---------------------------------------------------------------------------------------------------------------------------------------------------------------------------|-------------------------------------------------------------------------------------------------------------------------------------------------------------------------------------------------|-----------------------------------|
| EPI_ISL_833132,EPI_ISL_833133,EPI_ISL_1068104,EPI_ISL_1068105,EPI_ISL_1068106,EPI_ISL_1068109                                                                                                | Laboratorio de Ecología de Doenças Transmissíveis na Amazonia, Instituto Leonidas e Maria Deane - Fiocruz Amazonia                                                        | Laboratorio de Ecología de Doenças Transmissíveis na Amazonia, Instituto Leonidas e Maria Deane - Fiocruz Amazonia                                                                              | Valdinete Nascimento et al        |
| EPI_ISL_591532                                                                                                                                                                               | Laboratorio de Infectología y virologia molecular                                                                                                                         | Center for Mathematical Modeling and Center for Genome Regulation. Santiago, Chile                                                                                                              | Valiente F et al                  |
| EPI_ISL_779182,EPI_ISL_961788,EPI_ISL_961793,EPI_ISL_961795                                                                                                                                  | Laboratorio de Infectología, Servicio de Infectología, Hospital Universitario Dr. José Eleuterio González - Universidad Autónoma de Nuevo León                            | Laboratorio de Infectología Molecular, Departamento de Bioquímica y Medicina Molecular, Facultad de Medicina Universidad Autónoma de Nuevo León                                                 | Kame A. Galán-Huerta et al        |
| EPI_ISL_953402,EPI_ISL_953403,EPI_ISL_953410,EPI_ISL_953411,EPI_ISL_953412,EPI_ISL_953418,EPI_ISL_953420,EPI_ISL_953422                                                                      | Laboratorio de Investigaciones de Baney                                                                                                                                   | Swiss Tropical and Public Health Institute""                                                                                                                                                    | Carlos Cortes et al"              |
| EPI_ISL_648304,EPI_ISL_648314,EPI_ISL_648318,EPI_ISL_648322,EPI_ISL_648337,EPI_ISL_648339,EPI_ISL_648343,EPI_ISL_648358,EPI_ISL_648362,EPI_ISL_648365,EPI_ISL_648379,EPI_ISL_649163          | Laboratorio de Investigaciones de Baney                                                                                                                                   | University Hospital Basel, Clinical Bacteriology                                                                                                                                                | Carlos Cortes et al               |
| EPI_ISL_831939                                                                                                                                                                               | Laboratório de Microbiologia Molecular - Universidade FEEVALE                                                                                                             | Universidade Federal de Ciências da Saúde de Porto Alegre                                                                                                                                       | Vinicius Bonetti Franceschi et al |
| EPI_ISL_476416                                                                                                                                                                               | Laboratório de Patologia Clínica - UNICAMP                                                                                                                                | Laboratório de Estudos de Vírus Emergentes - UNICAMP                                                                                                                                            | José Luiz Proença-Modena et al    |
| EPI_ISL_1111421,EPI_ISL_1111425                                                                                                                                                              | Laboratorio de Referencia Nacional de Enteropatógenos. Instituto Nacional de Salud del Perú                                                                               | Laboratorio de Referencia Nacional de Enteropatógenos. Instituto Nacional de Salud del Perú                                                                                                     | Ronnie Gavilan Chavez et al       |
| EPI_ISL_517687,EPI_ISL_524473,EPI_ISL_527789                                                                                                                                                 | Laboratorio de Referencia Nacional de Virus Respiratorio. Centro Nacional de Salud Publica. Instituto Nacional de Salud Peru.                                             | Laboratorio de Referencia Nacional de Biotecnología y Biología Molecular. Centro Nacional de Salud Publica. Instituto Nacional de Salud Peru.                                                   | Carlos Padilla Rojas et al        |
| EPI_ISL_514226,EPI_ISL_514317,EPI_ISL_833038,EPI_ISL_1092335,EPI_ISL_1092356,EPI_ISL_1093153,EPI_ISL_1093158,EPI_ISL_1093163,EPI_ISL_1137479,EPI_ISL_1137483,EPI_ISL_1138419,EPI_ISL_1138420 | Laboratorio de Referencia Nacional de Virus Respiratorio. Instituto Nacional de Salud Perú                                                                                | Laboratorio de Referencia Nacional de Biotecnología y Biología Molecular. Instituto Nacional de Salud Perú                                                                                      | Carlos Padilla Rojas et al        |
| EPI_ISL_1111116,EPI_ISL_1111138,EPI_ISL_1111168,EPI_ISL_1111194,EPI_ISL_1111197,EPI_ISL_1111215,EPI_ISL_1111274,EPI_ISL_1111373                                                              | Laboratorio de Referencia Nacional de Virus Respiratorio. Instituto Nacional de Salud Perú                                                                                | Laboratorio de Referencia Nacional de Enteropatógenos. Instituto Nacional de Salud del Perú                                                                                                     | Ronnie Gavilan Chavez et al       |
| EPI_ISL_540933,EPI_ISL_540953,EPI_ISL_540969,EPI_ISL_568542,EPI_ISL_568543,EPI_ISL_729876,EPI_ISL_729889                                                                                     | Laboratorio de Referencia Nacional de Virus Respiratorios, Instituto Nacional de Salud Peru                                                                               | Laboratorio de Genómica Microbiana, Universidad Peruana Cayetano Heredia                                                                                                                        | Pablo Tsukayama et al             |
| EPI_ISL_1137615,EPI_ISL_1137619                                                                                                                                                              | Laboratorio de Salud Publica de Cauca                                                                                                                                     | Instituto Nacional de Salud- Dirección de Investigación en Salud Pública                                                                                                                        | Katherine Laiton-Donato et al     |
| EPI_ISL_1091923                                                                                                                                                                              | Laboratorio de salud público de Atlantico                                                                                                                                 | Instituto Nacional de Salud- Dirección de Investigación en Salud Pública                                                                                                                        | Katherine Laiton-Donato et al     |
| EPI_ISL_430807,EPI_ISL_792189,EPI_ISL_792203,EPI_ISL_792223                                                                                                                                  | Laboratorio de Virología del Hospital de Niños Dr. Ricardo Gutierrez                                                                                                      | Área de Secuenciación del Laboratorio de Virología del Hospital de Niños Dr. Ricardo Gutierrez on behalf of 'Proyecto Argentino Interinstitucional de genómica de SARS-CoV-2' (PAIS Consortium) | Nabaes Jodar et al                |
| EPI_ISL_671974                                                                                                                                                                               | Laboratorio de Virología y Microbiología Molecular, Depto. de Microbiología, Facultad de Medicina, Universidad de El Salvador/INS-laboratorio de Ref. Ministerio de Salud | Laboratorio de Virología y Microbiología Molecular, Depto. de Microbiología, Facultad de Medicina, Universidad de El Salvador/INS-laboratorio de Ref. Ministerio de Salud                       | Rivera NR et al                   |
| EPI_ISL_792346                                                                                                                                                                               | Laboratorio del Hospital Interzonal General de Agudos Evita                                                                                                               | Área de Secuenciación del Laboratorio de Virología del Hospital de Niños Dr. Ricardo Gutierrez on behalf of 'Proyecto Argentino Interinstitucional de genómica de SARS-CoV-2' (PAIS Consortium) | Nabaes Jodar et al                |

|                                                                                                                                                                                                                   |                                                                                                                                                                            |                                                                                                                                                                                                                                                                                                                                                                           |                                     |
|-------------------------------------------------------------------------------------------------------------------------------------------------------------------------------------------------------------------|----------------------------------------------------------------------------------------------------------------------------------------------------------------------------|---------------------------------------------------------------------------------------------------------------------------------------------------------------------------------------------------------------------------------------------------------------------------------------------------------------------------------------------------------------------------|-------------------------------------|
| EPI_ISL_750163                                                                                                                                                                                                    | Laboratorio DILAVE/MGAP-INIA-Udelar - Tacuarembó                                                                                                                           | Institut Pasteur de Montevideo                                                                                                                                                                                                                                                                                                                                            | Daiana Mir et al                    |
| EPI_ISL_956306                                                                                                                                                                                                    | Laboratorio Gencore- Universidad de los Andes                                                                                                                              | Instituto Nacional de Salud- Dirección de Investigación en Salud Pública, Universidad de los Andes- Gencore                                                                                                                                                                                                                                                               | Katherine Laiton-Donato et al       |
| EPI_ISL_1133255,EPI_ISL_1133269,EPI_ISL_1133270,EPI_ISL_1133273,EPI_ISL_1133276                                                                                                                                   | Laboratório Hermes Pardini                                                                                                                                                 | Laboratório de Biologia Integrativa, Instituto de Ciências Biológicas, Universidade Federal de Minas Gerais                                                                                                                                                                                                                                                               | Filipe Romero Rebello Moreira et al |
| EPI_ISL_837551,EPI_ISL_837552,EPI_ISL_837579,EPI_ISL_837583,EPI_ISL_837584,EPI_ISL_837585,EPI_ISL_837586,EPI_ISL_837587,EPI_ISL_837589,EPI_ISL_837590,EPI_ISL_837591,EPI_ISL_837592,EPI_ISL_837593,EPI_ISL_837595 | Laboratorio Nacional de Salud                                                                                                                                              | Laboratory of Respiratory Viruses and Measles, Oswaldo Cruz Institute, FIOCRUZ                                                                                                                                                                                                                                                                                            | Paola Resende et al                 |
| EPI_ISL_1091248,EPI_ISL_1091252                                                                                                                                                                                   | Laboratorio PGM                                                                                                                                                            | Laboratorio de Infectología Molecular, Departamento de Bioquímica y Medicina Molecular, Facultad de Medicina Universidad Autónoma de Nuevo León                                                                                                                                                                                                                           | Kame A. Galán-Huerta et al          |
| EPI_ISL_682277                                                                                                                                                                                                    | LABORATORIOS LABIN                                                                                                                                                         | Incienza, Instituto Costarricense de Investigación y Enseñanza en Nutrición y Salud                                                                                                                                                                                                                                                                                       | Francisco Duarte                    |
| EPI_ISL_961466                                                                                                                                                                                                    | Laboratorios Lister                                                                                                                                                        | Instituto de Diagnóstico y Referencia Epidemiológicos (INDRE)                                                                                                                                                                                                                                                                                                             | Claudia Wong-Arambula et al         |
| EPI_ISL_882960,EPI_ISL_882961                                                                                                                                                                                     | Laboratorium Diagnostyki Mikrobiologicznej z Pracownią Prątka Gruźlicy SPSzW im. Jana Bożego w Lublinie                                                                    | National Institute of Public Health - National Institute of Hygiene                                                                                                                                                                                                                                                                                                       | Wołkowicz Tomasz et al              |
| EPI_ISL_1081200                                                                                                                                                                                                   | Laboratory Corporation of America                                                                                                                                          | Respiratory Viruses Branch, Division of Viral Diseases, Centers for Disease Control and Prevention                                                                                                                                                                                                                                                                        | Peter W. Cook et al                 |
| EPI_ISL_541654,EPI_ISL_644566                                                                                                                                                                                     | Laboratory Diagnostic, Veterinary Specialized Institute Kraljevo                                                                                                           | Laboratory Diagnostic, Veterinary Specialized Institute Kraljevo                                                                                                                                                                                                                                                                                                          | Vidanovic et al                     |
| EPI_ISL_933533,EPI_ISL_1209407                                                                                                                                                                                    | Laboratory for HIV and opportunistic infections diagnosis The Republican Research and Practical Center for Epidemiology and Microbiology (RRPCEM)                          | Laboratory for HIV and opportunistic infections diagnosis The Republican Research and Practical Center for Epidemiology and Microbiology (RRPCEM)                                                                                                                                                                                                                         | Elena Gasich et al                  |
| EPI_ISL_455477                                                                                                                                                                                                    | Laboratory for Respiratory Viruses, Cantacuzino National Military-Medical Institute for Research and Development                                                           | Cantacuzino Institute                                                                                                                                                                                                                                                                                                                                                     | M.Lazar et al                       |
| EPI_ISL_935017                                                                                                                                                                                                    | Laboratory for Respiratory Viruses, Cantacuzino National Military-Medical Institute for Research and Development                                                           | Cantacuzino Institute Virology                                                                                                                                                                                                                                                                                                                                            | Luiza Ustea et al                   |
| EPI_ISL_417518,EPI_ISL_424978,EPI_ISL_464094,EPI_ISL_660543,EPI_ISL_660544,EPI_ISL_660545,EPI_ISL_667809,EPI_ISL_956321,EPI_ISL_956328                                                                            | Laboratory Medicine                                                                                                                                                        | Department of Laboratory Medicine, Lin-Kou Chang Gung Memorial Hospital, Taoyuan, Taiwan                                                                                                                                                                                                                                                                                  | Kuo-Chien Tsao et al                |
| EPI_ISL_411915                                                                                                                                                                                                    | Laboratory Medicine                                                                                                                                                        | Department of Laboratory Medicine, Lin-Kou Chang Gung Memorial Hospital, Taoyuan, Taiwan.                                                                                                                                                                                                                                                                                 | Kuo-Chien Tsao et al                |
| EPI_ISL_435045,EPI_ISL_435046,EPI_ISL_435047                                                                                                                                                                      | Laboratory of Applied Genetics                                                                                                                                             | RSE National Center for Biotechnology"                                                                                                                                                                                                                                                                                                                                    | Alexandr Shevtsov et al             |
| EPI_ISL_1138541                                                                                                                                                                                                   | Laboratory of Communicable Diseases                                                                                                                                        | 1. Laboratory of Communicable Diseases (Estonia); 2. Eurofins Genomics Europe Sequencing GmbH                                                                                                                                                                                                                                                                             | Liidia Dotsenko et al               |
| EPI_ISL_452355                                                                                                                                                                                                    | Laboratory of Infectious Diseases Center of Beijing Ditan Hospital                                                                                                         | Laboratory of Infectious Diseases Center of Beijing Ditan Hospital                                                                                                                                                                                                                                                                                                        | Siyuan Yang et al                   |
| EPI_ISL_717979                                                                                                                                                                                                    | Laboratory of Microbiology and Infectious Diseases, Faculty of Veterinary Medicine, Aristotle University of Thessaloniki, University Campus, 541 24, Thessaloniki, Greece. | Laboratory of Biology, Department of Medicine, Democritus University of Thrace, Alexandroupolis, Greece                                                                                                                                                                                                                                                                   | Dovrolis N. et al                   |
| EPI_ISL_654016                                                                                                                                                                                                    | Laboratory of Microbiology, National Reference Lab, Charles Nicolle Hospital; 2-University of Tunis ElManar, Faculty of Medicine of Tunis, LR99ES09, Tunis, Tunisia        | 1-Clinical and Experimental Pharmacology Lab, LR16SP02, National Center of Pharmacovigilance, University of Tunis El Manar, Tunis, Tunisia. 2- Neurodegenerative diseases and psychiatric troubles, LR18SP03, Razi Hospital, University of Tunis El Manar, Tunis, Tunisia. 3- Ministry of Health, National Observatory of New and Emerging Diseases, 1006, Tunis, Tunisia | Ilhem Boutiba-Ben Boubaker et al    |

|                                                                                                                                                                                                                                                                  |                                                                                                                                                                     |                                                                                                                                                                                                                                                                                                                                                                         |                                           |
|------------------------------------------------------------------------------------------------------------------------------------------------------------------------------------------------------------------------------------------------------------------|---------------------------------------------------------------------------------------------------------------------------------------------------------------------|-------------------------------------------------------------------------------------------------------------------------------------------------------------------------------------------------------------------------------------------------------------------------------------------------------------------------------------------------------------------------|-------------------------------------------|
| EPI_ISL_796782,EPI_ISL_803120                                                                                                                                                                                                                                    | Laboratory of Microbiology, National Reference Lab, Charles Nicolle Hospital; 2-University of Tunis ElManar, Faculty of Medicine of Tunis, LR99ES09, Tunis, Tunisia | Clinical and Experimental Pharmacology Lab, LR16SP02, National Center of Pharmacovigilance, University of Tunis El Manar, Tunis, Tunisia. 2- Neurodegenerative diseases and psychiatric troubles, LR18SP03, Razi Hospital, University of Tunis El Manar, Tunis, Tunisia. 3- Ministry of Health, National Observatory of New and Emerging Diseases, 1006, Tunis, Tunisia | Ilhem Boutiba-Ben Boubaker et al          |
| EPI_ISL_852842                                                                                                                                                                                                                                                   | Laboratory of Molecular Biology, Diagnostyka sp. z o.o.                                                                                                             | genXone SA, Research & Development Laboratory                                                                                                                                                                                                                                                                                                                           | Maciej Sykulski et al                     |
| EPI_ISL_801546,EPI_ISL_801615,EPI_ISL_801635,EPI_ISL_801762,EPI_ISL_801765,EPI_ISL_801767,EPI_ISL_801786                                                                                                                                                         | Laboratory of Molecular Virology, Pontificia Universidad Católica de Chile                                                                                          | MSHS Pathogen Surveillance Program                                                                                                                                                                                                                                                                                                                                      | Leonardo I. Almonacid et al               |
| EPI_ISL_454575,EPI_ISL_454586,EPI_ISL_454585                                                                                                                                                                                                                     | Laboratory of virology, National Center of Expertise                                                                                                                | Laboratory of molecular-genetic research, National Center for Expertise, Kazakhstan National Center for Biotechnology, Kazakhstan                                                                                                                                                                                                                                       | Abdaliyev Askar et al                     |
| EPI_ISL_454579,EPI_ISL_454582                                                                                                                                                                                                                                    | Laboratory of virology, National Center of Expertise                                                                                                                | Laboratory of molecular-genetic research, National Center of Expertise, Kazakhstan National Center for Biotechnology, Kazakhstan                                                                                                                                                                                                                                        | Abdaliyev Askar et al                     |
| EPI_ISL_576119                                                                                                                                                                                                                                                   | Laboratory, The Bio Arte Limited                                                                                                                                    | Laboratory, The Bio Arte Limited                                                                                                                                                                                                                                                                                                                                        | Biazzo et al                              |
| EPI_ISL_861864,EPI_ISL_1036069,EPI_ISL_1036070,EPI_ISL_1233628,EPI_ISL_1233637,EPI_ISL_1233663                                                                                                                                                                   | Labormedizinisches Zentrum Dr Risch                                                                                                                                 | University Hospital Basel, Clinical Bacteriology                                                                                                                                                                                                                                                                                                                        | Tim Roloff et al                          |
| EPI_ISL_534335                                                                                                                                                                                                                                                   | LabPLUS                                                                                                                                                             | Institute of Environmental Science and Research (ESR)                                                                                                                                                                                                                                                                                                                   | Matt Storey et al                         |
| EPI_ISL_1082266,EPI_ISL_1250703,EPI_ISL_1250705,EPI_ISL_1250708,EPI_ISL_1250709,EPI_ISL_1250711                                                                                                                                                                  | LabPLUS                                                                                                                                                             | Institute of Environmental Science and Research (ESR)                                                                                                                                                                                                                                                                                                                   | Rachel Boyle et al                        |
| EPI_ISL_548068,EPI_ISL_548080,EPI_ISL_579403,EPI_ISL_579425,EPI_ISL_637092,EPI_ISL_661257,EPI_ISL_661261,EPI_ISL_661263,EPI_ISL_755627,EPI_ISL_755632,EPI_ISL_794610,EPI_ISL_843193,EPI_ISL_877212,EPI_ISL_877221,EPI_ISL_877226,EPI_ISL_1016869,EPI_ISL_1082260 | LabPLUS                                                                                                                                                             | Institute of Environmental Science and Research (ESR)                                                                                                                                                                                                                                                                                                                   | Xiaoyun Ren et al                         |
| EPI_ISL_1016856                                                                                                                                                                                                                                                  | LabTests                                                                                                                                                            | Institute of Environmental Science and Research (ESR)                                                                                                                                                                                                                                                                                                                   | Xiaoyun Ren et al                         |
| EPI_ISL_717796,EPI_ISL_717797                                                                                                                                                                                                                                    | LACEN RJ - Noel Nutels                                                                                                                                              | Bioinformatics Laboratory / LNCC                                                                                                                                                                                                                                                                                                                                        | Carolina M Voloch et al                   |
| EPI_ISL_572337,EPI_ISL_572349,EPI_ISL_572362,EPI_ISL_572381                                                                                                                                                                                                      | LACEN/PE                                                                                                                                                            | WallauLab, Aggeu Magalhaes Institute                                                                                                                                                                                                                                                                                                                                    | Marcelo Henrique Santos Paiva et al       |
| EPI_ISL_738323,EPI_ISL_738324,EPI_ISL_812260,EPI_ISL_812269,EPI_ISL_812270,EPI_ISL_812277,EPI_ISL_812278,EPI_ISL_812283                                                                                                                                          | Landstuhl Regional Medical Center                                                                                                                                   | United States Air Force School of Aerospace Medicine                                                                                                                                                                                                                                                                                                                    | Anthony Fries et al                       |
| EPI_ISL_407079                                                                                                                                                                                                                                                   | Lapland Central Hospital                                                                                                                                            | Department of Virology, University of Helsinki and Helsinki University Hospital, Helsinki, Finland                                                                                                                                                                                                                                                                      | Teemu Smura et al                         |
| EPI_ISL_1091784,EPI_ISL_1091786                                                                                                                                                                                                                                  | LDSP                                                                                                                                                                | Universidad Nacional de Colombia - Laboratorio Genómico One Health                                                                                                                                                                                                                                                                                                      | Andres F. Cardona-Rios et al              |
| EPI_ISL_498552,EPI_ISL_498551,EPI_ISL_498556                                                                                                                                                                                                                     | Lebanese American University                                                                                                                                        | Lebanese American University                                                                                                                                                                                                                                                                                                                                            | Abi Habib et al                           |
| EPI_ISL_961467,EPI_ISL_961468,EPI_ISL_961469                                                                                                                                                                                                                     | LESP Nuevo Leon/Grupo de Diagnostico ARIES                                                                                                                          | Instituto de Diagnostico y Referencia Epidemiologicos (INDRE)                                                                                                                                                                                                                                                                                                           | Claudia Wong-Arambula et al               |
| EPI_ISL_532294                                                                                                                                                                                                                                                   | Lighthouse Lab in Glasgow                                                                                                                                           | Wellcome Sanger Institute for the COVID-19 Genomics UK (COG-UK) Consortium                                                                                                                                                                                                                                                                                              | Harper VanSteenhouse et al                |
| EPI_ISL_581117,EPI_ISL_601443,EPI_ISL_600093                                                                                                                                                                                                                     | Lighthouse Lab in Milton Keynes                                                                                                                                     | Wellcome Sanger Institute for the COVID-19 Genomics UK (COG-UK) consortium                                                                                                                                                                                                                                                                                              | The Lighthouse Lab in Milton Keynes et al |

|                                                                                                                                                                                                                    |                                                                                                             |                                                                                                                                                                                         |                                           |
|--------------------------------------------------------------------------------------------------------------------------------------------------------------------------------------------------------------------|-------------------------------------------------------------------------------------------------------------|-----------------------------------------------------------------------------------------------------------------------------------------------------------------------------------------|-------------------------------------------|
| EPI_ISL_644092                                                                                                                                                                                                     | Lighthouse Lab in Milton Keynes                                                                             | Wellcome Sanger Institute for the COVID-19 Genomics UK (COG-UK) Consortium                                                                                                              | The Lighthouse Lab in Milton Keynes et al |
| EPI_ISL_1008713                                                                                                                                                                                                    | Lister Laboratorio de Referencia S.A. de C.V.                                                               | Instituto de diagnóstico y Referencia Epidemiológicos (INDRE) Departamento de Virología                                                                                                 | Claudia Wong-Arambula et al               |
| EPI_ISL_541870                                                                                                                                                                                                     | Lithuanian University of Health Sciences Hospital, Department of Laboratory Medicine                        | Lithuanian University of Health Sciences, Laboratory of Molecular Cardiology                                                                                                            | Lukas Zemaitis et al                      |
| EPI_ISL_636604,EPI_ISL_636855                                                                                                                                                                                      | Lithuanian University of Health Sciences Hospital, Department of Laboratory Medicine                        | Lithuanian University of Health Sciences, Molecular cardiology lab.                                                                                                                     | Lukas Zemaitis et al                      |
| EPI_ISL_453294,EPI_ISL_453340,EPI_ISL_1249267                                                                                                                                                                      | Liverpool Clinical Laboratories                                                                             | COVID-19 Genomics UK (COG-UK) Consortium                                                                                                                                                | Sam Haldenby et al                        |
| EPI_ISL_469052,EPI_ISL_469053,EPI_ISL_482737,EPI_ISL_482739                                                                                                                                                        | LNR National Reference Laboratory, Mohammed VI University of Health Sciences                                | Medical Biotechnology Laboratory, Rabat Medical and Pharmacy School, Mohammed The Vth University in Rabat                                                                               | Meriem LAAMARTI et al                     |
| EPI_ISL_728236                                                                                                                                                                                                     | LNR National Reference Laboratory, Mohammed VI University of Health Sciences                                | Medical Biotechnology Laboratory, Rabat Medical and Pharmacy School, Mohammed The Vth University in Rabat                                                                               | Souad KARTTI et al                        |
| EPI_ISL_1069188                                                                                                                                                                                                    | Lumban Rural Health Unit                                                                                    | Research Institute for Tropical Medicine                                                                                                                                                | Hannah Leah Morito et al                  |
| EPI_ISL_644823                                                                                                                                                                                                     | Madigan Army Medical Center                                                                                 | U.S. Air Force School of Aerospace Medicine                                                                                                                                             | Emily Parsons et al                       |
| EPI_ISL_528743,EPI_ISL_528744,EPI_ISL_582124,EPI_ISL_977593,EPI_ISL_1059900                                                                                                                                        | Malaysia Genome Institute                                                                                   | Malaysia Genome Institute                                                                                                                                                               | Mohd Noor Mat Isa et al                   |
| EPI_ISL_1196017                                                                                                                                                                                                    | Manzini RRT                                                                                                 | National Institute for Communicable Diseases of the National Health Laboratory Service                                                                                                  | Maphalala GP et al                        |
| EPI_ISL_1233323                                                                                                                                                                                                    | Massachusetts State Public Health Laboratory                                                                | Massachusetts State Public Health Laboratory                                                                                                                                            | Andrew Lang et al                         |
| EPI_ISL_1257929,EPI_ISL_1258411,EPI_ISL_1258412                                                                                                                                                                    | MB-Cadham Provincial laboratory                                                                             | National Microbiology Laboratory (NML)                                                                                                                                                  | Anna Majer et al                          |
| EPI_ISL_1196000                                                                                                                                                                                                    | Mbabane Clinic                                                                                              | National Institute for Communicable Diseases of the National Health Laboratory Service                                                                                                  | Maphalala GP et al                        |
| EPI_ISL_1196001,EPI_ISL_1196007                                                                                                                                                                                    | Mbabane Gov Hospital                                                                                        | National Institute for Communicable Diseases of the National Health Laboratory Service                                                                                                  | Maphalala GP et al                        |
| EPI_ISL_482761,EPI_ISL_482773,EPI_ISL_483038,EPI_ISL_1109484,EPI_ISL_1109486,EPI_ISL_1165080,EPI_ISL_1165081,EPI_ISL_1167189                                                                                       | Medical Ain Shams Research Institute (MASRI), Ain Shams University                                          | Medical Ain Shams Research Institute (MASRI), Ain Shams University                                                                                                                      | Hesham Elghazaly et al                    |
| EPI_ISL_873165                                                                                                                                                                                                     | Medical Laboratory Sciences, Arab American University                                                       | Medical Laboratory Sciences, Arab American University                                                                                                                                   | Dumaidi et al                             |
| EPI_ISL_1254541                                                                                                                                                                                                    | Medical Microbiology Unit, Department for Laboratory Medicine, Drammen Hospital, Vestre Viken Health Trust, | Norwegian Institute of Public Health, Department of Virology                                                                                                                            | Kathrine Stene-Johansen et al             |
| EPI_ISL_882645                                                                                                                                                                                                     | Medical Research Center, Faculty of Medicine, Syarif Hidayatullah State Islamic University Jakarta          | Medical Research Center, Faculty of Medicine, Syarif Hidayatullah State Islamic University Jakarta                                                                                      | Chris Adhiyanto et al                     |
| EPI_ISL_1048371                                                                                                                                                                                                    | Megalab, Molecular and Cytogenetics Diagnostics                                                             | Department for Virology, Molecular Biology and Genome Research, R. G. Lugar Center for Public Health Research, National Center for Disease Control and Public Health (NCDC) of Georgia. | Giorgi Tomashvili et al                   |
| EPI_ISL_1020195                                                                                                                                                                                                    | Melania Hospital, Bogor , West Java                                                                         | Biosafety Level-3 Laboratory, Indonesian Institute of Sciences (LIPI)                                                                                                                   | Anggia Prasetyoputri et al                |
| EPI_ISL_568923,EPI_ISL_569109,EPI_ISL_569166,EPI_ISL_569176,EPI_ISL_569527,EPI_ISL_569546,EPI_ISL_644411,EPI_ISL_644444,EPI_ISL_804485,EPI_ISL_804494,EPI_ISL_804579,EPI_ISL_900088,EPI_ISL_900194,EPI_ISL_1020398 | MEPHI, Aix Marseille University                                                                             | MEPHI, Aix Marseille University                                                                                                                                                         | Anthony LEVASSEUR et al                   |
| EPI_ISL_480334,EPI_ISL_480335,EPI_ISL_480338,EPI_ISL_480346                                                                                                                                                        | Microbial Genomics Laboratory, Institut Pasteur de Montevideo                                               | Microbial Genomics Laboratory, Institut Pasteur de Montevideo                                                                                                                           | Cecilia Salazar et al                     |
| EPI_ISL_875558                                                                                                                                                                                                     | Microbiologia e Virologia                                                                                   | Istituto Zooprofilattico Sperimentale delle Venezie                                                                                                                                     | Adelaide Milani et al                     |

|                                                                                                                                                                                                                                                                                              |                                                                                                                                                                                                                |                                                                                                                                                                                  |                               |
|----------------------------------------------------------------------------------------------------------------------------------------------------------------------------------------------------------------------------------------------------------------------------------------------|----------------------------------------------------------------------------------------------------------------------------------------------------------------------------------------------------------------|----------------------------------------------------------------------------------------------------------------------------------------------------------------------------------|-------------------------------|
| EPI_ISL_562199,EPI_ISL_562204,EPI_ISL_562212,EPI_ISL_562221,EPI_ISL_562238,EPI_ISL_562252,EPI_ISL_562293                                                                                                                                                                                     | Microbiological Diagnostic Unit - Public Health Laboratory (MDU-PHL)                                                                                                                                           | MDU-PHL                                                                                                                                                                          | Seemann et al                 |
| EPI_ISL_640543,EPI_ISL_640630,EPI_ISL_663451                                                                                                                                                                                                                                                 | Microbiological Diagnostic Unit - Public Health Laboratory (MDU-PHL)                                                                                                                                           | MDU-PHL                                                                                                                                                                          | Seemann T. et al              |
| EPI_ISL_418269                                                                                                                                                                                                                                                                               | Microbiology and Immunology department, Pasteur institute in Ho Chi Minh city                                                                                                                                  | Microbiology and Immunology department, Pasteur institute in Ho Chi Minh city                                                                                                    | Cao et al                     |
| EPI_ISL_418267                                                                                                                                                                                                                                                                               | Microbiology and Immunology department, Pasteur institute in Ho Chi Minh city                                                                                                                                  | Microbiology and Immunology department, Pasteur institute in Ho Chi Minh city                                                                                                    | Nguyen et al                  |
| EPI_ISL_1208560                                                                                                                                                                                                                                                                              | Microbiology Department, Laboratori Clinic Metropolitana Nord. Hospital Universitari Germans Trias i Pujol.                                                                                                    | Can Ruti SARS-CoV-2 Sequencing Hub (HUGTiP/IrsiCaixa/IGTP)                                                                                                                       | Marc Noguera-Julian et al     |
| EPI_ISL_1082257,EPI_ISL_1082267                                                                                                                                                                                                                                                              | Middlemore Hospital                                                                                                                                                                                            | Institute of Environmental Science and Research (ESR)                                                                                                                            | Rachel Boyle et al            |
| EPI_ISL_548036,EPI_ISL_548053,EPI_ISL_548132,EPI_ISL_548133,EPI_ISL_755624,EPI_ISL_794625,EPI_ISL_1016844                                                                                                                                                                                    | Middlemore Hospital                                                                                                                                                                                            | Institute of Environmental Science and Research (ESR)                                                                                                                            | Xiaoyun Ren et al             |
| EPI_ISL_718154,EPI_ISL_718161,EPI_ISL_718164,EPI_ISL_718220                                                                                                                                                                                                                                  | Ministry of Health Hospitals                                                                                                                                                                                   | Institute of Health and Community Medicine                                                                                                                                       | David Perera et al            |
| EPI_ISL_1302723                                                                                                                                                                                                                                                                              | Ministry of Health Turkey                                                                                                                                                                                      | Ministry of Health Turkey                                                                                                                                                        | Fatma Bayrakdar et al         |
| EPI_ISL_903375,EPI_ISL_903377,EPI_ISL_903378,EPI_ISL_903379,EPI_ISL_903380,EPI_ISL_903381,EPI_ISL_903389                                                                                                                                                                                     | MOH - Jaber Al-Ahmad Hospital (Innovation Research Laboratory)                                                                                                                                                 | MOH - Jaber Al-Ahmad Hospital (Innovation Research Laboratory)                                                                                                                   | Salman Al-Sabah et al         |
| EPI_ISL_435124,EPI_ISL_435125,EPI_ISL_435134,EPI_ISL_435137,EPI_ISL_520698,EPI_ISL_520715,EPI_ISL_520720                                                                                                                                                                                     | Mohammed Bin Rashid University of Medicine and Health Sciences                                                                                                                                                 | Al Jalila Genomics Center                                                                                                                                                        | Ahmad Abou Tayoun et al       |
| EPI_ISL_904016,EPI_ISL_904015                                                                                                                                                                                                                                                                | Molecular Biology and Virology lab, Faculty of Veterinary Medicine, Jordan University of Science and Technology                                                                                                | Molecular Biology and Virology lab, Faculty of Veterinary Medicine, Jordan University of Science and Technology                                                                  | Mohammad Hussien Alboom et al |
| EPI_ISL_895793,EPI_ISL_895820                                                                                                                                                                                                                                                                | Molecular biology division, Institute of Clinical Biochemistry and Diagnostics, Charles University, Faculty of Medicine in Hradec Králové and University Hospital Hradec Králové                               | Molecular biology division, Institute of Clinical Biochemistry and Diagnostics, Charles University, Faculty of Medicine in Hradec Králové and University Hospital Hradec Králové | Helena Kovaříková et al       |
| EPI_ISL_486827,EPI_ISL_534346                                                                                                                                                                                                                                                                | Molecular diagnostic laboratory of Federal Budget Institution of Science Central Research Institute of Epidemiology" of The Federal Service on Customers' Rights Protection and Human Well-being Surveillance" | Group of Genomics and Postgenomic Technologies of Central Research Institute of Epidemiology                                                                                     | Speranskaya AS et al          |
| EPI_ISL_614347,EPI_ISL_614348,EPI_ISL_614349,EPI_ISL_614350,EPI_ISL_614355,EPI_ISL_614361,EPI_ISL_614367,EPI_ISL_614385,EPI_ISL_614386,EPI_ISL_614387,EPI_ISL_614388,EPI_ISL_614389,EPI_ISL_614392,EPI_ISL_614393,EPI_ISL_614395,EPI_ISL_681830,EPI_ISL_681831,EPI_ISL_681840,EPI_ISL_681842 | Molecular diagnostic unit for viral haemorrhagic fevers and emerging viruses, Bouaké CHU Laboratory                                                                                                            | Project group Epidemiology of Highly Pathogenic Microorganisms, Robert Koch-Institute                                                                                            | Chantal Akoua-Koffi et al     |
| EPI_ISL_451957                                                                                                                                                                                                                                                                               | Molecular Pathology Division, Department of Pathology, Hong Kong Sanatorium & Hospital                                                                                                                         | Molecular Pathology Division, Department of Pathology, Hong Kong Sanatorium & Hospital                                                                                           | Chun Hang AU et al            |
| EPI_ISL_640039                                                                                                                                                                                                                                                                               | Mossel Bay Hospital wc MBY                                                                                                                                                                                     | NHLS/UCT                                                                                                                                                                         | Arash Iranzadeh et al         |
| EPI_ISL_889363,EPI_ISL_889367                                                                                                                                                                                                                                                                | Motol University Hospital                                                                                                                                                                                      | Institute of Applied Biotechnologies a.s.                                                                                                                                        | Petr Klempert et al           |
| EPI_ISL_954242,EPI_ISL_954270,EPI_ISL_954299                                                                                                                                                                                                                                                 | MRC/UVRI & LSHTM Uganda Research Unit                                                                                                                                                                          | Where sequence data have been generated and submitted to GISAID                                                                                                                  | Matthew Cotten et al          |

|                                                                                                                                                                                                                                                                                                                                                                                                                 |                                                                                                            |                                                                                                                                                                         |                              |
|-----------------------------------------------------------------------------------------------------------------------------------------------------------------------------------------------------------------------------------------------------------------------------------------------------------------------------------------------------------------------------------------------------------------|------------------------------------------------------------------------------------------------------------|-------------------------------------------------------------------------------------------------------------------------------------------------------------------------|------------------------------|
| EPI_ISL_561014,EPI_ISL_561015,EPI_ISL_561040,EPI_ISL_561217,EPI_ISL_561234,EPI_ISL_561237,EPI_ISL_561238,EPI_ISL_561267,EPI_ISL_561269,EPI_ISL_561276,EPI_ISL_561283,EPI_ISL_810971,EPI_ISL_810974,EPI_ISL_810982,EPI_ISL_915421,EPI_ISL_915192,EPI_ISL_1216081,EPI_ISL_1216121,EPI_ISL_1216127,EPI_ISL_1234525,EPI_ISL_1234526,EPI_ISL_1234528,EPI_ISL_1234529,EPI_ISL_1234530,EPI_ISL_1234531,EPI_ISL_1234536 | MRCG at LSHTM Genomics lab                                                                                 | MRCG at LSHTM Genomics lab                                                                                                                                              | Abdul Karim sesay et al      |
| EPI_ISL_471159,EPI_ISL_471160,EPI_ISL_471161,EPI_ISL_471162,EPI_ISL_471168,EPI_ISL_471170                                                                                                                                                                                                                                                                                                                       | MRCG at LSHTM Genomics lab                                                                                 | MRCG at LSHTM Genomics lab                                                                                                                                              | Sesay et al et al            |
| EPI_ISL_802416                                                                                                                                                                                                                                                                                                                                                                                                  | MSHS Clinical Microbiology Laboratories                                                                    | MSHS Pathogen Surveillance Program                                                                                                                                      | Ana S. Gonzalez Reiche et al |
| EPI_ISL_861758                                                                                                                                                                                                                                                                                                                                                                                                  | Murphy Medical Associates                                                                                  | Grubaugh Lab - Yale School of Public Health                                                                                                                             | Tara Alpert et al            |
| EPI_ISL_1141924                                                                                                                                                                                                                                                                                                                                                                                                 | MVZ Labor Dr. Fenner und Kollegen (Standort Hamburg)                                                       | Robert Koch Institute                                                                                                                                                   | et al                        |
| EPI_ISL_1144206                                                                                                                                                                                                                                                                                                                                                                                                 | MVZ Labor Dr. Limbach & Kollegen GbR                                                                       | Robert Koch Institute                                                                                                                                                   | et al                        |
| EPI_ISL_447918                                                                                                                                                                                                                                                                                                                                                                                                  | n/a                                                                                                        | National Institute of Health. Department of medical Sciences, Ministry of Public Health, Thailand                                                                       | Pilailuk et al               |
| EPI_ISL_523968                                                                                                                                                                                                                                                                                                                                                                                                  | National Agency for Public Health, Republic of Moldova                                                     | Charite Universitatsmedizin Berlin, Institute of Virology                                                                                                               | Victor M Corman et al        |
| EPI_ISL_1231534,EPI_ISL_1233470,EPI_ISL_1233521,EPI_ISL_1233558,EPI_ISL_1233559                                                                                                                                                                                                                                                                                                                                 | National Center for Infectious and Parasitic Diseases (NCIPD)                                              | National Center for Infectious and Parasitic Diseases (NCIPD)                                                                                                           | Alexiev et al et al          |
| EPI_ISL_1139148,EPI_ISL_1139154,EPI_ISL_1139155,EPI_ISL_1139156                                                                                                                                                                                                                                                                                                                                                 | National Center of Disease Control and Prevention of the Republic of Armenia                               | Institute of Molecular Biology NAS RA, Republic of Armenia, Department of Bioengineering, Bioinformatics Institute and Molecular Biology IBMPh RAU, Republic of Armenia | Arsen Arakelyan et al        |
| EPI_ISL_454572                                                                                                                                                                                                                                                                                                                                                                                                  | National Center of Expertise                                                                               | National Center for Expertise, Kazakhstan National Center for Biotechnology, Kazakhstan                                                                                 | Abdaliyev Askar et al        |
| EPI_ISL_454571                                                                                                                                                                                                                                                                                                                                                                                                  | National Center of Expertise                                                                               | National Center for Expertise, National Center for Biotechnology, Kazakhstan                                                                                            | Abdaliyev Askar et al        |
| EPI_ISL_497879                                                                                                                                                                                                                                                                                                                                                                                                  | National Centre For Cell Science                                                                           | National Centre For Cell Science                                                                                                                                        | Dhiraj Paul et al            |
| EPI_ISL_436413                                                                                                                                                                                                                                                                                                                                                                                                  | National Centre for Disease control (NCDC)                                                                 | NCDC/CSIR-IGIB                                                                                                                                                          | Pramod Kumar# et al          |
| EPI_ISL_435070                                                                                                                                                                                                                                                                                                                                                                                                  | National Centre for Disease control (NCDC), CSIR-Institute of Genomics and Integrative Biology (CSIR-IGIB) | NCDC/CSIR-IGIB                                                                                                                                                          | Pramod Kumar et al           |
| EPI_ISL_1252724                                                                                                                                                                                                                                                                                                                                                                                                 | National Food and Veterinary Risk Assessment Institute                                                     | Vilnius University Hospital Santaros Klinikos, Center of Laboratory Medicine                                                                                            | Gytis Dudas et al            |
| EPI_ISL_528604                                                                                                                                                                                                                                                                                                                                                                                                  | National Genomics Core-Center for DNA Fingerprinting and Diagnostics                                       | National Genomics Core- Center for DNA Fingerprinting and Diagnostics (NGC-CDFD)- DBT's PAN-INDIA-1000 Genome consortium                                                | Ashwin Dalal et al           |
| EPI_ISL_466843,EPI_ISL_466852,EPI_ISL_528602                                                                                                                                                                                                                                                                                                                                                                    | National Genomics Core-Center for DNA Fingerprinting and Diagnostics                                       | National Genomics Core- Center for DNA Fingerprinting and Diagnostics (NGC-CDFD)- DBT's PAN-INDIA-1000 Genome consortium                                                | Bala Pratyusha et al         |
| EPI_ISL_528542,EPI_ISL_528543,EPI_ISL_528566,EPI_ISL_528583,EPI_ISL_528628,EPI_ISL_528880                                                                                                                                                                                                                                                                                                                       | National Genomics Core-Center for DNA Fingerprinting and Diagnostics                                       | National Genomics Core- Center for DNA Fingerprinting and Diagnostics (NGC-CDFD)- DBT's PAN-INDIA-1000 Genome consortium                                                | G Shashikanth et al          |
| EPI_ISL_528554,EPI_ISL_528557,EPI_ISL_528620,EPI_ISL_528635                                                                                                                                                                                                                                                                                                                                                     | National Genomics Core-Center for DNA Fingerprinting and Diagnostics                                       | National Genomics Core- Center for DNA Fingerprinting and Diagnostics (NGC-CDFD)- DBT's PAN-INDIA-1000 Genome consortium                                                | Heena Shah et al             |
| EPI_ISL_770475                                                                                                                                                                                                                                                                                                                                                                                                  | National health Laboratory                                                                                 | Botswana Institute for Technology Research and Innovation                                                                                                               | Kefentse Arnold Tumedi et al |
| EPI_ISL_770470,EPI_ISL_770473,EPI_ISL_770474,EPI_ISL_770471,EPI_ISL_770472                                                                                                                                                                                                                                                                                                                                      | National Health laboratory                                                                                 | Botswana Institute for Technology Research and Innovation                                                                                                               | Kefentse Arnold Tumedi et al |
| EPI_ISL_560386                                                                                                                                                                                                                                                                                                                                                                                                  | National Health Laboratory                                                                                 | Botswana Institute for Technology Research and innovation                                                                                                               | Kefentse Arnold Tumedi et al |



|                                                                                                                                        |                                                                                                                                         |                                                                                                                                         |                              |
|----------------------------------------------------------------------------------------------------------------------------------------|-----------------------------------------------------------------------------------------------------------------------------------------|-----------------------------------------------------------------------------------------------------------------------------------------|------------------------------|
| EPI_ISL_560385,EPI_ISL_560387,EPI_ISL_560388,EPI_ISL_560389,EPI_ISL_560390                                                             | National Health Laboratory                                                                                                              | Botswana Institute for Technology Research and Innovation                                                                               | Kefentse Arnold Tumedl et al |
| EPI_ISL_622980                                                                                                                         | National Health Laboratory Service                                                                                                      | National Institute for Communicable Diseases of the National Health Laboratory Service                                                  | Allam M et al                |
| EPI_ISL_1048553,EPI_ISL_1048554,EPI_ISL_1048556,EPI_ISL_1048563,EPI_ISL_1048564,EPI_ISL_1048567                                        | National Health Laboratory Service, South Africa                                                                                        | KRISP, KZn Research Innovation and Sequencing Platform                                                                                  | Giandhari J et al            |
| EPI_ISL_1080937                                                                                                                        | National Health Laboratory Services                                                                                                     | National Health Laboratory Services                                                                                                     | Mushal Ali et al             |
| EPI_ISL_1072960,EPI_ISL_1071111                                                                                                        | National Health Laboratory Services                                                                                                     | National Health Laboratory Services, Virology                                                                                           | Mushal Ali et al             |
| EPI_ISL_456599,EPI_ISL_456600,EPI_ISL_456604,EPI_ISL_456605,EPI_ISL_456606,EPI_ISL_456612                                              | National Health Laboratory, Timor-Leste                                                                                                 | Microbiological Diagnostic Unit Public Health Laboratory, The Peter Doherty Institute for Infection and Immunity                        | Soares da Silva et al        |
| EPI_ISL_435308,EPI_ISL_435312,EPI_ISL_455707,EPI_ISL_455709,EPI_ISL_455710,EPI_ISL_455712,EPI_ISL_455714,EPI_ISL_455718,EPI_ISL_511892 | National Hospital of Tropical Diseases                                                                                                  | Oxford University Clinical Research Unit, Hanoi, Vietnam                                                                                | Nguyen Thi Tam et al         |
| EPI_ISL_486889                                                                                                                         | National Influenza Center, Bahrain                                                                                                      | National Influenza Center, Bahrain                                                                                                      | Altaif et al                 |
| EPI_ISL_486887                                                                                                                         | National Influenza Center, Bahrain                                                                                                      | National Influenza Center, Bahrain                                                                                                      | Zaed et al                   |
| EPI_ISL_416431,EPI_ISL_416429                                                                                                          | National Influenza Center, National Institute of Hygiene and Epidemiology (NIHE)                                                        | National Influenza Center, National Institute of Hygiene and Epidemiology (NIHE)                                                        | Le Quynh Mai et al           |
| EPI_ISL_660542                                                                                                                         | National Influenza Center, National Institute of Hygiene and Epidemiology (NIHE)                                                        | National Institute of Hygiene and Epidemiology (NIHE)                                                                                   | Le Quynh Mai et al           |
| EPI_ISL_862078,EPI_ISL_1014679,EPI_ISL_1014684                                                                                         | National Influenza Center, Virology Department                                                                                          | National Influenza Center                                                                                                               | A Nejati et al               |
| EPI_ISL_862077,EPI_ISL_862080,EPI_ISL_959277,EPI_ISL_959280,EPI_ISL_959282,EPI_ISL_1014683,EPI_ISL_1014687                             | National Influenza Center, Virology Department                                                                                          | National Influenza Center                                                                                                               | J Yavarian et al             |
| EPI_ISL_862079,EPI_ISL_959279,EPI_ISL_1014680,EPI_ISL_1014685                                                                          | National Influenza Center, Virology Department                                                                                          | National Influenza Center                                                                                                               | K Sadeghi et al              |
| EPI_ISL_862076,EPI_ISL_862081,EPI_ISL_959276,EPI_ISL_959281,EPI_ISL_959283,EPI_ISL_1014677,EPI_ISL_1014682,EPI_ISL_1014686             | National Influenza Center, Virology Department                                                                                          | National Influenza Center                                                                                                               | NZ Shafiei Jandaghi et al    |
| EPI_ISL_862075,EPI_ISL_959275,EPI_ISL_959284,EPI_ISL_1014676,EPI_ISL_1014681                                                           | National Influenza Center, Virology Department                                                                                          | National Influenza Center                                                                                                               | V Salimi et al               |
| EPI_ISL_476835                                                                                                                         | National Influenza Centre for Northern Greece                                                                                           | National Influenza Centre for Northern Greece                                                                                           | Maria Christoforidi et al    |
| EPI_ISL_410301                                                                                                                         | National Influenza Centre, National Public Health Laboratory, Kathmandu, Nepal                                                          | The University of Hong Kong                                                                                                             | Ranjit Sah et al             |
| EPI_ISL_402125                                                                                                                         | National Institute for Communicable Disease Control and Prevention (ICDC) Chinese Center for Disease Control and Prevention (China CDC) | National Institute for Communicable Disease Control and Prevention (ICDC) Chinese Center for Disease Control and Prevention (China CDC) | Zhang et al                  |
| EPI_ISL_450296,EPI_ISL_450495,EPI_ISL_490257,EPI_ISL_490258,EPI_ISL_490265,EPI_ISL_490269,EPI_ISL_514413,EPI_ISL_622925                | National Institute for Communicable Diseases of the National Health Laboratory Service                                                  | National Institute for Communicable Diseases of the National Health Laboratory Service                                                  | Allam M et al                |
| EPI_ISL_469254                                                                                                                         | National Institute for Viral Disease Control and Prevention, China CDC                                                                  | Institute of Viral Disease Control and Prevention, China CDC                                                                            | Wenjie Tan et al             |
| EPI_ISL_469255                                                                                                                         | National Institute for Viral Disease Control and Prevention, China CDC                                                                  | Institute of Viral Disease Control and Prevention, China CDC                                                                            | Xiang Zhao et al             |
| EPI_ISL_591272,EPI_ISL_591280,EPI_ISL_591279,EPI_ISL_591275,EPI_ISL_591274,EPI_ISL_591277,EPI_ISL_591276                               | National Institute for Viral Disease Control and Prevention, China CDC                                                                  | National Institute for Viral Disease Control and Prevention, China CDC                                                                  | Huilai Ma et al              |

|                                                                                                                                                                                                                                                                                                                                 |                                                                                                                            |                                                                                                                                   |                                 |
|---------------------------------------------------------------------------------------------------------------------------------------------------------------------------------------------------------------------------------------------------------------------------------------------------------------------------------|----------------------------------------------------------------------------------------------------------------------------|-----------------------------------------------------------------------------------------------------------------------------------|---------------------------------|
| EPI_ISL_469256,EPI_ISL_498691,EPI_ISL_498692,EPI_ISL_498694,EPI_ISL_850948,EPI_ISL_850949,EPI_ISL_850950,EPI_ISL_850951                                                                                                                                                                                                         | National Institute for Viral Disease Control and Prevention, China CDC                                                     | National Institute for Viral Disease Control and Prevention, China CDC                                                            | Xiang Zhao et al                |
| EPI_ISL_709542                                                                                                                                                                                                                                                                                                                  | National Institute of Blood Diseases (NIBD), Molecular Biology Lab                                                         | Genomics Lab NIBD                                                                                                                 | Samina Naz Mukry et al          |
| EPI_ISL_1169046                                                                                                                                                                                                                                                                                                                 | National Institute of Health Research and Development                                                                      | National Institute of Health Research and Development                                                                             | Hana Apsari Pawestri et al      |
| EPI_ISL_538508                                                                                                                                                                                                                                                                                                                  | National Institute of Health Research and Development                                                                      | National Institute of Health Research and Development                                                                             | Pawestri et al                  |
| EPI_ISL_747234                                                                                                                                                                                                                                                                                                                  | National Institute of Health Research and Development                                                                      | National Institute of Health Research and Development                                                                             | Subangkit et al                 |
| EPI_ISL_479758,EPI_ISL_479757                                                                                                                                                                                                                                                                                                   | National Institute of Hygiene and Epidemiology (NIHE)                                                                      | National Key Laboratory of Gene Technology, Institute of Biotechnology (IBT)                                                      | Le Tung Lam et al               |
| EPI_ISL_1116448,EPI_ISL_1279947,EPI_ISL_1279967                                                                                                                                                                                                                                                                                 | National Institute of Infectious Diseases-Prof. Dr. Matei Bals Molecular Diagnostics Laboratory                            | National Institute of Infectious Diseases-Prof. Dr. Matei Bals Molecular Diagnostics Laboratory                                   | Leontina Banica et al           |
| EPI_ISL_603243                                                                                                                                                                                                                                                                                                                  | National Institute of Laboratory Medicine and Referral Center                                                              | Genomic Research Lab, BCSIR                                                                                                       | Barna Goswami et al             |
| EPI_ISL_603244,EPI_ISL_982505                                                                                                                                                                                                                                                                                                   | National Institute of Laboratory Medicine and Referral Center                                                              | Genomic Research Lab, BCSIR                                                                                                       | Iffat Jahan et al               |
| EPI_ISL_983330                                                                                                                                                                                                                                                                                                                  | National Institute of Laboratory Medicine and Referral Center                                                              | Genomic Research Lab, BCSIR                                                                                                       | Md. Ahashan Habib et al         |
| EPI_ISL_959386                                                                                                                                                                                                                                                                                                                  | National Institute of Laboratory Medicine and Referral Center                                                              | Genomic Research Lab, BCSIR                                                                                                       | Md. Maruf Ahmed Molla et al     |
| EPI_ISL_603240                                                                                                                                                                                                                                                                                                                  | National Institute of Laboratory Medicine and Referral Center                                                              | Genomic Research Lab, BCSIR                                                                                                       | Tanjina Akhter Banu et al       |
| EPI_ISL_539781,EPI_ISL_539778                                                                                                                                                                                                                                                                                                   | National Institute of Public Health (Czech Republic)                                                                       | State Veterinary Institute Prague                                                                                                 | Nagy et al                      |
| EPI_ISL_434558                                                                                                                                                                                                                                                                                                                  | National Institutes of Health, University of the Philippines Manila                                                        | Philippine Genome Center                                                                                                          | Carlo M. Lapid et al            |
| EPI_ISL_1267011,EPI_ISL_1267023                                                                                                                                                                                                                                                                                                 | National Laboratory for Health, Environment and Food, OMM, Maribor                                                         | CISLD (Clinical Institute of Special Laboratory Diagnostics), University Children's Hospital, University Medical Center Ljubljana | Jernej Kovač et al              |
| EPI_ISL_512616,EPI_ISL_512633,EPI_ISL_512640                                                                                                                                                                                                                                                                                    | National Laboratory for Influenza/Virology reference laboratory, Public Health Center of the Ministry of Health of Ukraine | Respiratory Virus Unit, Microbiology Services Colindale, Public Health England                                                    | PHE Covid Sequencing Team et al |
| EPI_ISL_1257898                                                                                                                                                                                                                                                                                                                 | National Medicines Institute                                                                                               | DNA Sequencing and Synthesis Facility (oligo.pl), Institute of Biochemistry and Biophysics PAS                                    | Gawor Jan et al                 |
| EPI_ISL_1191785,EPI_ISL_1191797,EPI_ISL_1191816,EPI_ISL_1191818,EPI_ISL_1191819,EPI_ISL_1191822,EPI_ISL_1191824,EPI_ISL_1191828,EPI_ISL_1191830,EPI_ISL_1191831,EPI_ISL_1191832,EPI_ISL_1191833,EPI_ISL_1191834,EPI_ISL_1191845,EPI_ISL_1191898,EPI_ISL_1191947,EPI_ISL_1191991,EPI_ISL_1192002,EPI_ISL_1192020,EPI_ISL_1192028 | National Microbiology Reference Laboratory                                                                                 | Quadram Institute Bioscience                                                                                                      | Tapfumanei Mashe et al          |
| EPI_ISL_647971,EPI_ISL_647977,EPI_ISL_647978,EPI_ISL_647980                                                                                                                                                                                                                                                                     | National Microbiology Reference Laboratory                                                                                 | Quadram Institute Bioscience                                                                                                      | Thanh Le Viet et al             |
| EPI_ISL_1039982,EPI_ISL_1095610,EPI_ISL_1195207                                                                                                                                                                                                                                                                                 | National Public Health Center, COVID Laboratory                                                                            | National Public Health Center, National Biosafety Laboratory                                                                      | Bernadett Pályi et al           |
| EPI_ISL_457834,EPI_ISL_457843,EPI_ISL_457844                                                                                                                                                                                                                                                                                    | National Public Health Laboratory                                                                                          | KEMRI-Wellcome Trust Research Programme/KEMRI-CGMR-C Kilifi                                                                       | Githinji G. et al 2020 et al    |
| EPI_ISL_416885,EPI_ISL_416884,EPI_ISL_416907                                                                                                                                                                                                                                                                                    | National Public Health Laboratory                                                                                          | Malaysia Genome Institute                                                                                                         | Mohd Noor Mat Isa et al         |
| EPI_ISL_754072                                                                                                                                                                                                                                                                                                                  | National Public Health Laboratory                                                                                          | Nepal Health Research Council                                                                                                     | Pradip Gyanwali et al           |

|                                                                                                                                                                                                                                                                                                                                                                                           |                                                                            |                                                                                                  |                          |
|-------------------------------------------------------------------------------------------------------------------------------------------------------------------------------------------------------------------------------------------------------------------------------------------------------------------------------------------------------------------------------------------|----------------------------------------------------------------------------|--------------------------------------------------------------------------------------------------|--------------------------|
| EPI_ISL_845546,EPI_ISL_845548,EPI_ISL_845549,EPI_ISL_845550,EPI_ISL_845551,EPI_ISL_845552,EPI_ISL_845553,EPI_ISL_845554,EPI_ISL_845557,EPI_ISL_845558,EPI_ISL_845560,EPI_ISL_845561,EPI_ISL_845562,EPI_ISL_845563,EPI_ISL_845565                                                                                                                                                          | National Public Health Laboratory, Cameroon                                | African Centre of Excellence for Genomics of Infectious Diseases (ACEGID), Redeemer's University | Oluniyi P.E. et al et al |
| EPI_ISL_418994,EPI_ISL_462332,EPI_ISL_469113,EPI_ISL_475982,EPI_ISL_475984,EPI_ISL_475998,EPI_ISL_479594,EPI_ISL_479597,EPI_ISL_483615,EPI_ISL_493404,EPI_ISL_498579,EPI_ISL_498591,EPI_ISL_498617,EPI_ISL_536423,EPI_ISL_536427,EPI_ISL_536453,EPI_ISL_536454,EPI_ISL_548976                                                                                                             | National Public Health Laboratory, National Centre for Infectious Diseases | National Public Health Laboratory, National Centre for Infectious Diseases                       | Mak TM et al             |
| EPI_ISL_596480,EPI_ISL_596491,EPI_ISL_596495,EPI_ISL_605817,EPI_ISL_626628,EPI_ISL_728189,EPI_ISL_754076,EPI_ISL_754082,EPI_ISL_754083,EPI_ISL_803959,EPI_ISL_803960,EPI_ISL_803961,EPI_ISL_803962,EPI_ISL_825083,EPI_ISL_833373,EPI_ISL_833375,EPI_ISL_857471,EPI_ISL_862820,EPI_ISL_937516,EPI_ISL_981010,EPI_ISL_981011,EPI_ISL_995295,EPI_ISL_1173250,EPI_ISL_1173251,EPI_ISL_1252449 | National Public Health Laboratory, National Centre for Infectious Diseases | National Public Health Laboratory, National Centre for Infectious Diseases                       | Tze Minn Mak et al       |
| EPI_ISL_1122419,EPI_ISL_1122420,EPI_ISL_1122421                                                                                                                                                                                                                                                                                                                                           | National Public Health Laboratory, National Centre for Infectious Diseases | National Virology Reference Laboratory                                                           | Tze Minn Mak et al       |
| EPI_ISL_1273391,EPI_ISL_1273392,EPI_ISL_1273393,EPI_ISL_1273394,EPI_ISL_1273395,EPI_ISL_1273396,EPI_ISL_1273399,EPI_ISL_1273401,EPI_ISL_1273406,EPI_ISL_1273407,EPI_ISL_1273408                                                                                                                                                                                                           | National Reference Laboratory - Ministry of Health Maseru Lesotho          | National Institute for Communicable Diseases of the National Health Laboratory Service           | Gorova V et al           |
| EPI_ISL_480297,EPI_ISL_480299,EPI_ISL_480302                                                                                                                                                                                                                                                                                                                                              | National Reference Laboratory Influenza and acute respiratory diseases""   | NRL-HIV                                                                                          | Ivan Ivanov et al        |
| EPI_ISL_625683,EPI_ISL_833578                                                                                                                                                                                                                                                                                                                                                             | National Reference Laboratory for COVID-19, Pasteur Institute of Iran      | National Reference Laboratory for COVID-19, Pasteur Institute of Iran                            | Zahra Ahmadi et al       |
| EPI_ISL_737200,EPI_ISL_1073135                                                                                                                                                                                                                                                                                                                                                            | National Reference Laboratory, Nigeria Centre for Disease Control.         | National Reference Laboratory, Nigeria Centre for Disease Control, Gaduwa, Abuja, Nigeria        | Dr Ndodo Nnaemeka et al  |
| EPI_ISL_435674,EPI_ISL_435675,EPI_ISL_435676,EPI_ISL_443187                                                                                                                                                                                                                                                                                                                               | National Virology Reference Laboratory                                     | National Public Health Laboratory, National Centre for Infectious Diseases                       | Mak Tze Minn et al       |
| EPI_ISL_962877,EPI_ISL_962878                                                                                                                                                                                                                                                                                                                                                             | National Virology Reference Laboratory                                     | National Public Health Laboratory, National Centre for Infectious Diseases                       | Tze Minn Mak et al       |
| EPI_ISL_501260,EPI_ISL_578219,EPI_ISL_639897,EPI_ISL_732476,EPI_ISL_837363,EPI_ISL_875367,EPI_ISL_909901,EPI_ISL_909902                                                                                                                                                                                                                                                                   | National Virus Reference Laboratory                                        | National Virus Reference Laboratory                                                              | Michael Carr et al       |
| EPI_ISL_1252151,EPI_ISL_1299429                                                                                                                                                                                                                                                                                                                                                           | National Virus Reference Laboratory                                        | National Virus Reference Laboratory                                                              | Zoe Yandle et al         |
| EPI_ISL_444996,EPI_ISL_444998,EPI_ISL_444999,EPI_ISL_445000                                                                                                                                                                                                                                                                                                                               | Naval Health Research Center                                               | Naval Medical Research Center Biological Defense Research Directorate                            | Logan Voegtly et al      |

|                                                                                                                                                                                                                                                                                                                                                                                        |                                                               |                                                                                                                            |                           |
|----------------------------------------------------------------------------------------------------------------------------------------------------------------------------------------------------------------------------------------------------------------------------------------------------------------------------------------------------------------------------------------|---------------------------------------------------------------|----------------------------------------------------------------------------------------------------------------------------|---------------------------|
| EPI_ISL_1272242,EPI_ISL_1272243                                                                                                                                                                                                                                                                                                                                                        | NB-Hôpital Georges L. Dumont                                  | National Microbiology Laboratory (NML)                                                                                     | Anna Majer et al          |
| EPI_ISL_754068,EPI_ISL_754069,EPI_ISL_754070                                                                                                                                                                                                                                                                                                                                           | Nepal Korea Friendship Municipality Hospital                  | Nepal Health Research Council                                                                                              | Pradip Gyanwali et al     |
| EPI_ISL_678581,EPI_ISL_678586                                                                                                                                                                                                                                                                                                                                                          | Netcare                                                       | KRISP, KZN Research Innovation and Sequencing Platform                                                                     | Giandhari J et al         |
| EPI_ISL_1061033                                                                                                                                                                                                                                                                                                                                                                        | New South Wales Health Pathology Royal Prince Alfred Hospital | Microbiology RPAH                                                                                                          | Foster et al              |
| EPI_ISL_854991,EPI_ISL_854988                                                                                                                                                                                                                                                                                                                                                          | NGS Lab, DNA SOLUTION LTD.                                    | NGS Lab, DNA SOLUTION LTD.                                                                                                 | Khan et al                |
| EPI_ISL_1196008,EPI_ISL_1196009,EPI_ISL_1196010                                                                                                                                                                                                                                                                                                                                        | Nhlangano Health Centre                                       | National Institute for Communicable Diseases of the National Health Laboratory Service                                     | Maphalala GP et al        |
| EPI_ISL_467492,EPI_ISL_495516,EPI_ISL_495522,EPI_ISL_495526,EPI_ISL_495560,EPI_ISL_498054,EPI_ISL_509370,EPI_ISL_515609,EPI_ISL_515632,EPI_ISL_515765,EPI_ISL_518033,EPI_ISL_518036,EPI_ISL_529727,EPI_ISL_535401,EPI_ISL_535453,EPI_ISL_602792,EPI_ISL_602805,EPI_ISL_605789                                                                                                          | NHLS-IALCH                                                    | KRISP, KZN Research Innovation and Sequencing Platform                                                                     | Giandhari J et al         |
| EPI_ISL_418242,EPI_ISL_420037,EPI_ISL_766864,EPI_ISL_766865,EPI_ISL_766866,EPI_ISL_766869,EPI_ISL_766871,EPI_ISL_766873                                                                                                                                                                                                                                                                | NIC Viral Respiratory Unit - Institut Pasteur of Algeria      | National Reference Center for Viruses of Respiratory Infections, Institut Pasteur, Paris                                   | Mélanie Albert et al      |
| EPI_ISL_516936,EPI_ISL_516934                                                                                                                                                                                                                                                                                                                                                          | Nicolae Testemitanu State University of Medicine and Pharmacy | International Centre for Genetic Engineering and Biotechnology (ICGEB) and ARGO Open Lab Platform for Genome Sequencing    | Ulinici M et al           |
| EPI_ISL_825714,EPI_ISL_1073139,EPI_ISL_1073640,EPI_ISL_1073639,EPI_ISL_1197066,EPI_ISL_1197065,EPI_ISL_1197129                                                                                                                                                                                                                                                                         | Nigeria Centre For Disease Control                            | National reference Laboratory, NCDC, Gaduwa, Abuja                                                                         | Dr Ndodo Nnaemeka et al   |
| EPI_ISL_872601,EPI_ISL_872602,EPI_ISL_872604,EPI_ISL_941281,EPI_ISL_941283,EPI_ISL_941285,EPI_ISL_1242019                                                                                                                                                                                                                                                                              | Nigeria Centre for Disease Control (NCDC)                     | African Centre of Excellence for Genomics of Infectious Diseases (ACEGID), Redeemer's University                           | Oluniyi P.E. et al et al  |
| EPI_ISL_455429,EPI_ISL_487092,EPI_ISL_487099,EPI_ISL_487098                                                                                                                                                                                                                                                                                                                            | Nigeria Centre for Disease Control (NCDC)                     | African Centre of Excellence for Genomics of Infectious Diseases (ACEGID), Redeemer's University, Ede, Osun State, Nigeria | Oluniyi P.E. et al        |
| EPI_ISL_527880,EPI_ISL_527911,EPI_ISL_729939,EPI_ISL_729942,EPI_ISL_729944,EPI_ISL_729945,EPI_ISL_729949,EPI_ISL_729971,EPI_ISL_729972,EPI_ISL_729973,EPI_ISL_729975,EPI_ISL_729976,EPI_ISL_729977,EPI_ISL_729978,EPI_ISL_729979,EPI_ISL_729980,EPI_ISL_729981,EPI_ISL_729982,EPI_ISL_729984,EPI_ISL_729985,EPI_ISL_730001,EPI_ISL_730025,EPI_ISL_730030,EPI_ISL_730032,EPI_ISL_730043 | Nigeria Centre for Disease Control (NCDC)                     | African Centre of Excellence for Genomics of Infectious Diseases (ACEGID), Redeemer's University, Ede, Osun State, Nigeria | Oluniyi P.E. et al et al  |
| EPI_ISL_977540                                                                                                                                                                                                                                                                                                                                                                         | Nigeria Centre of Disease Control (NCDC)                      | African Centre of Excellence for Genomics of Infectious Diseases (ACEGID), Redeemer's University                           | Olawoye I. B. et al et al |
| EPI_ISL_1093433,EPI_ISL_1235667                                                                                                                                                                                                                                                                                                                                                        | Nigerian Centre for Disease Control (NCDC)                    | African Centre of Excellence for Genomics of Infectious Diseases (ACEGID), Redeemer's University                           | Olawoye et al             |
| EPI_ISL_479506,EPI_ISL_1034170,EPI_ISL_1034184                                                                                                                                                                                                                                                                                                                                         | NIV Influenza                                                 | NIV Influenza                                                                                                              | Potdar V et al            |
| EPI_ISL_1254248                                                                                                                                                                                                                                                                                                                                                                        | NJDOH, Public Health and Environmental Laboratories           | NJ_PHEL                                                                                                                    | Lindsey Bodnar et al      |

|                                                                                                                                                                                                                                                                                                                                                                                                                |                                                                                                                                                                                                                     |                                                                                                                                                         |                                                   |
|----------------------------------------------------------------------------------------------------------------------------------------------------------------------------------------------------------------------------------------------------------------------------------------------------------------------------------------------------------------------------------------------------------------|---------------------------------------------------------------------------------------------------------------------------------------------------------------------------------------------------------------------|---------------------------------------------------------------------------------------------------------------------------------------------------------|---------------------------------------------------|
| EPI_ISL_1278101                                                                                                                                                                                                                                                                                                                                                                                                | NL-Dr. Leonard A. Miller Centre for Health Services                                                                                                                                                                 | National Microbiology Laboratory (NML)                                                                                                                  | Anna Majer et al                                  |
| EPI_ISL_960304                                                                                                                                                                                                                                                                                                                                                                                                 | NLZOH, Laboratory for Virology                                                                                                                                                                                      | NLZOH, Laboratory for Virology                                                                                                                          | Katarina Prosenec (Laboratory for Virology) et al |
| EPI_ISL_422404,EPI_ISL_422405,EPI_ISL_422399,EPI_ISL_422394,EPI_ISL_422384                                                                                                                                                                                                                                                                                                                                     | NMIMR, Department of Virology                                                                                                                                                                                       | WACCBIP, University of Ghana                                                                                                                            | Joyce M. Ngoi et al                               |
| EPI_ISL_548062,EPI_ISL_579093,EPI_ISL_579094,EPI_ISL_579095,EPI_ISL_579096,EPI_ISL_579406                                                                                                                                                                                                                                                                                                                      | North Shore Hospital                                                                                                                                                                                                | Institute of Environmental Science and Research (ESR)                                                                                                   | Xiaoyun Ren et al                                 |
| EPI_ISL_453501                                                                                                                                                                                                                                                                                                                                                                                                 | Northumbria University / South Tees Hospitals NHS Foundation Trust / North Cumbria Integrated Care NHS Foundation Trust / North Tees and Hartlepool NHS Foundation Trust / Newcastle Hospitals NHS Foundation Trust | COVID-19 Genomics UK (COG-UK) Consortium                                                                                                                | Darren L Smith et al                              |
| EPI_ISL_416742                                                                                                                                                                                                                                                                                                                                                                                                 | NRL for Influenza, Centrum Epidemiology and Microbiology of National Institute of Public Health, Czech Republic                                                                                                     | Charite Universitaetsmedizin Berlin, Institute of Virology                                                                                              | Victor M Corman et al                             |
| EPI_ISL_1272330,EPI_ISL_1272332,EPI_ISL_1272340,EPI_ISL_1272343                                                                                                                                                                                                                                                                                                                                                | NS-QEII Health Sciences Centre                                                                                                                                                                                      | National Microbiology Laboratory (NML)                                                                                                                  | Anna Majer et al                                  |
| EPI_ISL_735447,EPI_ISL_735448                                                                                                                                                                                                                                                                                                                                                                                  | Nucleic Acid Testing - Rwanda National Reference Laboratory                                                                                                                                                         | GIGA Medical Genomics                                                                                                                                   | Yvan Butera et al                                 |
| EPI_ISL_925891,EPI_ISL_925893,EPI_ISL_925900,EPI_ISL_925901,EPI_ISL_925902,EPI_ISL_925904,EPI_ISL_960228,EPI_ISL_960236,EPI_ISL_960237,EPI_ISL_960242,EPI_ISL_960265,EPI_ISL_960276,EPI_ISL_960278,EPI_ISL_960283,EPI_ISL_960300,EPI_ISL_960301,EPI_ISL_960302,EPI_ISL_1301743,EPI_ISL_1301744,EPI_ISL_1301746,EPI_ISL_1301759,EPI_ISL_1301795,EPI_ISL_1301796,EPI_ISL_1301797,EPI_ISL_1302680,EPI_ISL_1302681 | Nucleic Acid Testing, National Reference Laboratory                                                                                                                                                                 | GIGA Medical Genomics                                                                                                                                   | Yvan Butera et al                                 |
| EPI_ISL_1117409,EPI_ISL_1117411,EPI_ISL_1117418,EPI_ISL_1117446,EPI_ISL_1117448                                                                                                                                                                                                                                                                                                                                | Nucleo de Pesquisa em Inovacao Terapeutica - UFPE                                                                                                                                                                   | LABBE, Federal University of Pernambuco                                                                                                                 | Wilson Jose da Silva Junior et al                 |
| EPI_ISL_1060650,EPI_ISL_1060652,EPI_ISL_1262510                                                                                                                                                                                                                                                                                                                                                                | NYU Langone Health                                                                                                                                                                                                  | Departments of Pathology and Medicine, New York University School of Medicine                                                                           | Adriana Heguy et al                               |
| EPI_ISL_1138863                                                                                                                                                                                                                                                                                                                                                                                                | Office of Diseases Prevention and Control Region 4 Saraburi                                                                                                                                                         | COVID-19 Network Investigations (CONI) Alliance                                                                                                         | Elizabeth Batty et al                             |
| EPI_ISL_667382                                                                                                                                                                                                                                                                                                                                                                                                 | OHSU Lab Services Molecular Microbiology Lab                                                                                                                                                                        | Oregon SARS-CoV-2 Genome Sequencing Center                                                                                                              | Brendan L. O'Connell et al                        |
| EPI_ISL_745126                                                                                                                                                                                                                                                                                                                                                                                                 | Okiep CHC                                                                                                                                                                                                           | National Health Laboratory Service (NHLS), Tygerberg                                                                                                    | Susan Engelbrecht et al                           |
| EPI_ISL_889372                                                                                                                                                                                                                                                                                                                                                                                                 | Olomouc University Hospital                                                                                                                                                                                         | Institute of Applied Biotechnologies a.s.                                                                                                               | Petr Klempt et al                                 |
| EPI_ISL_491162,EPI_ISL_491163,EPI_ISL_491164                                                                                                                                                                                                                                                                                                                                                                   | Oman-National Influenza Center                                                                                                                                                                                      | Biotechnology & OMICs Laboratory                                                                                                                        | Sajjad Asaf et al                                 |
| EPI_ISL_491136,EPI_ISL_491139,EPI_ISL_491140                                                                                                                                                                                                                                                                                                                                                                   | Oman-National Influenza Center                                                                                                                                                                                      | Biotechnology & OMICs Laboratory                                                                                                                        | Samiha Al-Kharusi et al                           |
| EPI_ISL_492065                                                                                                                                                                                                                                                                                                                                                                                                 | Oman-National Influenza Center                                                                                                                                                                                      | Department of Microbiology and Immunology-SQUH<br>Department of Microbiology and Immunology, Sultan Qaboos University Hospital, P.O 35, Postal code 123 | Samira Al-Maruqi et al                            |
| EPI_ISL_766569,EPI_ISL_766570                                                                                                                                                                                                                                                                                                                                                                                  | Oman-National Influenza Center                                                                                                                                                                                      | Oman-National Influenza Center                                                                                                                          | Samiha Al-Kharusi et al                           |
| EPI_ISL_457703                                                                                                                                                                                                                                                                                                                                                                                                 | Oman-NIC                                                                                                                                                                                                            | Department of Microbiology and Immunology- SQUH                                                                                                         | Fahad Zadjali et al                               |

|                                                                                           |                                                                                                                                                  |                                                                                          |                               |
|-------------------------------------------------------------------------------------------|--------------------------------------------------------------------------------------------------------------------------------------------------|------------------------------------------------------------------------------------------|-------------------------------|
| EPI_ISL_491969,EPI_ISL_492001,EPI_ISL_492014,EPI_ISL_492022,EPI_ISL_492024                | Oman-NIC                                                                                                                                         | Department of Microbiology and Immunology-SQUH                                           | Fahad Zadjali et al           |
| EPI_ISL_457701,EPI_ISL_457704,EPI_ISL_457979,EPI_ISL_457989,EPI_ISL_457992                | Oman-NIC                                                                                                                                         | Oman-NIC                                                                                 | Samira Al-Maruqi et al        |
| EPI_ISL_457705                                                                            | OMAN-NIC                                                                                                                                         | Department of Microbiology and Immunology- SQUH                                          | Fahad Zadjali et al           |
| EPI_ISL_569785                                                                            | Omsk Research Institute of Natural Focal Infections                                                                                              | WHO National Influenza Centre Russian Federation                                         | Artem Fadeev et al            |
| EPI_ISL_854800,EPI_ISL_854801,EPI_ISL_854802,EPI_ISL_854806                               | Ontario's COVID-19 Genomics Rapid Response Coalition                                                                                             | McMaster University                                                                      | Ana Cabrera et al             |
| EPI_ISL_648507                                                                            | Orange County Public Health Lab                                                                                                                  | Chan-Zuckerberg Biohub                                                                   | CZB Cliahub Consortium et al  |
| EPI_ISL_1040028,EPI_ISL_1040029,EPI_ISL_1040030                                           | Original detection - Virology Unit, Institut Pasteur du Cambodge; Sequencing - US National Institute of Allergy and Infectious Diseases Cambodia | Virology Unit, Institut Pasteur du Cambodge                                              | Jennifer Bohl et al           |
| EPI_ISL_590910,EPI_ISL_635172                                                             | Oslo University Hospital, Department of Medical Microbiology                                                                                     | Norwegian Institute of Public Health, Department of Virology                             | Kathrine Stene-Johansen et al |
| EPI_ISL_429233,EPI_ISL_418261                                                             | Ospedale Civile Giuseppe Mazzini                                                                                                                 | Istituto Zooprofilattico Sperimentale dell'Abruzzo e Molise G. Caporale""                | Lorusso A et al               |
| EPI_ISL_420592                                                                            | Ospedale Civile Giuseppe Mazzini                                                                                                                 | Istituto Zooprofilattico Sperimentale dell'Abruzzo e Molise G.Caporale""                 | Lorusso A et al               |
| EPI_ISL_635116                                                                            | Ostfold Hospital Trust - Kalnes, Centre for Laboratory Medicine, Section for gene technology and infection serology                              | Norwegian Institute of Public Health, Department of Virology                             | Kathrine Stene-Johansen et al |
| EPI_ISL_498184,EPI_ISL_498186                                                             | OUCRU                                                                                                                                            | OUCRU                                                                                    | Nguyen Van Vinh Chau et al    |
| EPI_ISL_1001385,EPI_ISL_1001438                                                           | Outre mer                                                                                                                                        | National Reference Center for Viruses of Respiratory Infections, Institut Pasteur, Paris | Marion Barbet et al           |
| EPI_ISL_954044,EPI_ISL_954125,EPI_ISL_1201529                                             | Outre Mer                                                                                                                                        | National Reference Center for Viruses of Respiratory Infections, Institut Pasteur, Paris | Marion Barbet et al           |
| EPI_ISL_1273214,EPI_ISL_1293350                                                           | Oxford University Clinical Research Unit (OUCRU)                                                                                                 | Oxford University Clinical Research Unit (OUCRU)                                         | Nguyen Van Vinh Chau et al    |
| EPI_ISL_596508,EPI_ISL_596519,EPI_ISL_596522,EPI_ISL_596525,EPI_ISL_596528,EPI_ISL_596529 | Palestinian Ministry of Health                                                                                                                   | Molecular Genetics Lab                                                                   | Nouar Qutob et al             |
| EPI_ISL_955905                                                                            | Pamela Youde Nethersole Eastern Hospital                                                                                                         | Hong Kong Department of Health                                                           | Alan K.L. Tsang et al         |
| EPI_ISL_1173020,EPI_ISL_1258495                                                           | Pandemic Response Lab - NYC                                                                                                                      | Pandemic Response Lab, R&D                                                               | Henry Lee et al               |
| EPI_ISL_430845                                                                            | Pasig City General Hospital                                                                                                                      | Research Institute for Tropical Medicine                                                 | Medado et al                  |
| EPI_ISL_654881                                                                            | Pasteur Institute in Ho Chi Minh city                                                                                                            | Department of Microbiology and Immunology - Pasteur Institute in Ho Chi Minh city        | Lương Chấn Quang et al        |
| EPI_ISL_812922                                                                            | Pasteur Institute in Ho Chi Minh city                                                                                                            | Department of Microbiology and Immunology - Pasteur Institute in Ho Chi Minh city        | Manh Huy Dao et al            |
| EPI_ISL_442523                                                                            | Pasteur Institute of Iran                                                                                                                        | Kawsar Human Genetic Research Company                                                    | Sirous Zeinali et al          |
| EPI_ISL_463749                                                                            | Pasteur Institute of Iran                                                                                                                        | Rapid Response Team                                                                      | Mahboobeh Rafigh et al        |
| EPI_ISL_660153,EPI_ISL_660155,EPI_ISL_660156,EPI_ISL_912401                               | PathCare                                                                                                                                         | National Health Laboratory Service (NHLS), Tygerberg                                     | Susan Engelbrecht et al       |

|                                                                                                                                                                                                                                                                                                                                                                                                                                                                                                                                                                                                                                              |                                                                                 |                                                                                 |                                                                   |
|----------------------------------------------------------------------------------------------------------------------------------------------------------------------------------------------------------------------------------------------------------------------------------------------------------------------------------------------------------------------------------------------------------------------------------------------------------------------------------------------------------------------------------------------------------------------------------------------------------------------------------------------|---------------------------------------------------------------------------------|---------------------------------------------------------------------------------|-------------------------------------------------------------------|
| EPI_ISL_591411,EPI_ISL_591435,EPI_ISL_591448,EPI_ISL_591449,EPI_ISL_591466,EPI_ISL_591467,EPI_ISL_591468,EPI_ISL_591469,EPI_ISL_591470,EPI_ISL_591535,EPI_ISL_667606,EPI_ISL_667654,EPI_ISL_667667,EPI_ISL_685390,EPI_ISL_685395,EPI_ISL_685396,EPI_ISL_685584,EPI_ISL_685644,EPI_ISL_689173,EPI_ISL_690635,EPI_ISL_690698,EPI_ISL_690711,EPI_ISL_690939,EPI_ISL_692046,EPI_ISL_721574,EPI_ISL_735442,EPI_ISL_736891,EPI_ISL_768658,EPI_ISL_768687,EPI_ISL_768707,EPI_ISL_768714,EPI_ISL_779220,EPI_ISL_779238,EPI_ISL_892703,EPI_ISL_900981,EPI_ISL_1129120,EPI_ISL_1129123,EPI_ISL_1129151,EPI_ISL_1129152,EPI_ISL_1129154,EPI_ISL_1129157 | Pathogen Genomics Center, National Institute of Infectious Diseases             | Pathogen Genomics Center, National Institute of Infectious Diseases             | Tsuyoshi Sekizuka et al                                           |
| EPI_ISL_512999                                                                                                                                                                                                                                                                                                                                                                                                                                                                                                                                                                                                                               | Pathogen Genomics Lab King Abdullah University of Science and Technology(KAUST) | Pathogen Genomics Lab King Abdullah University of Science and Technology(KAUST) | Amit Kumar Subudhi et al                                          |
| EPI_ISL_677914,EPI_ISL_677925                                                                                                                                                                                                                                                                                                                                                                                                                                                                                                                                                                                                                | Pathogen Genomics Lab King Abdullah University of Science and Technology(KAUST) | Pathogen Genomics Lab King Abdullah University of Science and Technology(KAUST) | Muhammad Shuaib et al                                             |
| EPI_ISL_678095                                                                                                                                                                                                                                                                                                                                                                                                                                                                                                                                                                                                                               | Pathogen Genomics Lab King Abdullah University of Science and Technology(KAUST) | Pathogen Genomics Lab King Abdullah University of Science and Technology(KAUST) | Olga Douvropoulou et al                                           |
| EPI_ISL_512890,EPI_ISL_512898,EPI_ISL_678181,EPI_ISL_678191,EPI_ISL_751222                                                                                                                                                                                                                                                                                                                                                                                                                                                                                                                                                                   | Pathogen Genomics Lab King Abdullah University of Science and Technology(KAUST) | Pathogen Genomics Lab King Abdullah University of Science and Technology(KAUST) | Raece Naeem et al                                                 |
| EPI_ISL_513053                                                                                                                                                                                                                                                                                                                                                                                                                                                                                                                                                                                                                               | Pathogen Genomics Lab King Abdullah University of Science and Technology(KAUST) | Pathogen Genomics Lab King Abdullah University of Science and Technology(KAUST) | Rahul P Salunke et al                                             |
| EPI_ISL_512946,EPI_ISL_512979,EPI_ISL_677920,EPI_ISL_751236                                                                                                                                                                                                                                                                                                                                                                                                                                                                                                                                                                                  | Pathogen Genomics Lab King Abdullah University of Science and Technology(KAUST) | Pathogen Genomics Lab King Abdullah University of Science and Technology(KAUST) | Sara Mfarrej et al                                                |
| EPI_ISL_512910                                                                                                                                                                                                                                                                                                                                                                                                                                                                                                                                                                                                                               | Pathogen Genomics Lab King Abdullah University of Science and Technology(KAUST) | Pathogen Genomics Lab King Abdullah University of Science and Technology(KAUST) | Sharif Hala et al                                                 |
| EPI_ISL_733164,EPI_ISL_733213                                                                                                                                                                                                                                                                                                                                                                                                                                                                                                                                                                                                                | Pathogenic Microorganisms Variability Laboratory                                | WHO National Influenza Centre Russian Federation                                | Andrey Komissarov et al                                           |
| EPI_ISL_956048                                                                                                                                                                                                                                                                                                                                                                                                                                                                                                                                                                                                                               | Pathology and Laboratory Medicine Institute, Cleveland Clinic, Ohio, USA        | Pathology and Laboratory Medicine Institute, Cleveland Clinic, Ohio, USA        | Frank P. Esper et al                                              |
| EPI_ISL_596779,EPI_ISL_596781,EPI_ISL_605881,EPI_ISL_810796,EPI_ISL_810965,EPI_ISL_933801,EPI_ISL_1198803                                                                                                                                                                                                                                                                                                                                                                                                                                                                                                                                    | PathWest Laboratory Medicine WA                                                 | PathWest Laboratory Medicine WA Microbial Surveillance Unit                     | PathWest Laboratory Medicine WA Microbial Surveillance Unit et al |
| EPI_ISL_1063627,EPI_ISL_1063774                                                                                                                                                                                                                                                                                                                                                                                                                                                                                                                                                                                                              | PGIMER, Chandigarh                                                              | ICMR-NATIONAL INSTITUTE OF VIROLOGY, MICROBIAL CONTAINMENT COMPLEX              | Pragya D. Yadav et al                                             |
| EPI_ISL_1081793,EPI_ISL_1081794                                                                                                                                                                                                                                                                                                                                                                                                                                                                                                                                                                                                              | Philippine Red Cross                                                            | Philippine Genome Center                                                        | Francis A. Tablizo et al                                          |
| EPI_ISL_1241841                                                                                                                                                                                                                                                                                                                                                                                                                                                                                                                                                                                                                              | PHV-FSS                                                                         | PHV-FSS                                                                         | Son Nguyen et al                                                  |
| EPI_ISL_1194612                                                                                                                                                                                                                                                                                                                                                                                                                                                                                                                                                                                                                              | Plateforme de testing Namuroise                                                 | Plateforme de testing Namuroise                                                 | Céline Maschietto et al                                           |
| EPI_ISL_539851                                                                                                                                                                                                                                                                                                                                                                                                                                                                                                                                                                                                                               | Pok Oi Hospital                                                                 | Hong Kong Department of Health                                                  | Alan K.L. Tsang et al                                             |
| EPI_ISL_759955                                                                                                                                                                                                                                                                                                                                                                                                                                                                                                                                                                                                                               | Primasatya Husada Citra Hospital                                                | Institute of Tropical Disease, Universitas Airlangga                            | Aldise M Natri et al                                              |
| EPI_ISL_956307                                                                                                                                                                                                                                                                                                                                                                                                                                                                                                                                                                                                                               | Primasatya Husada Citra Hospital                                                | Institute of Tropical Disease, Universitas Airlangga                            | Krisnodi Rahardjo et al                                           |
| EPI_ISL_417064                                                                                                                                                                                                                                                                                                                                                                                                                                                                                                                                                                                                                               | Prince of Wales Hospital                                                        | Hong Kong Department of Health                                                  | Alan K.L. Tsang et al                                             |
| EPI_ISL_1093397                                                                                                                                                                                                                                                                                                                                                                                                                                                                                                                                                                                                                              | Princess Haya Biotechnology Center/ Jordan University of Science & Technology   | Princess Haya Biotechnology Center/ Jordan University of Science & Technology   | Saied Jaradat et al                                               |

|                                                                                                            |                                                                                                                            |                                                                                                                            |                               |
|------------------------------------------------------------------------------------------------------------|----------------------------------------------------------------------------------------------------------------------------|----------------------------------------------------------------------------------------------------------------------------|-------------------------------|
| EPI_ISL_574492                                                                                             | Programme in Emerging Infectious Diseases, Duke-NUS Medical School                                                         | National Public Health Laboratory, National Centre for Infectious Diseases                                                 | Tze Minn Mak et al            |
| EPI_ISL_523959                                                                                             | Pronto Socorro Municipal de Perus                                                                                          | Instituto Adolfo Lutz, Interdisciplinary Procedures Center, Strategic Laboratory                                           | Claudio Tavares Sacchi et al  |
| EPI_ISL_693231                                                                                             | Pronto Socorro Municipal de Santa Branca                                                                                   | Instituto Adolfo Lutz, Interdisciplinary Procedures Center, Strategic Laboratory                                           | Claudio Tavares Sacchi et al  |
| EPI_ISL_887244                                                                                             | Protzer Lab                                                                                                                | Protzer Lab, Gagneur Lab, Robert Koch Institut                                                                             | Ulrike Protzer et al          |
| EPI_ISL_1112753                                                                                            | Public Health Center of Ukraine                                                                                            | Charité Universitätsmedizin Berlin, Institute of Virology                                                                  | Victor M Corman et al         |
| EPI_ISL_636973                                                                                             | Public Health Lab                                                                                                          | Public Health Lab                                                                                                          | Alwasti et al                 |
| EPI_ISL_425177                                                                                             | Public Health Ontario                                                                                                      | Public Health Agency of Canada - National Microbiology Laboratory                                                          | Amrit S. Boese et al          |
| EPI_ISL_413015                                                                                             | Public Health Ontario Laboratory                                                                                           | National Microbiology Laboratory                                                                                           | Shari Tyson et al             |
| EPI_ISL_693282,EPI_ISL_693284,EPI_ISL_693285                                                               | Public Health Virology Laboratory, Forensic and Scientific Services (PHV-FSS)                                              | Public Health Virology Laboratory, Forensic and Scientific Services (PHV-FSS)                                              | Son Nguyen et al              |
| EPI_ISL_513312,EPI_ISL_513313                                                                              | Public Health, United States Air Force School of Aerospace Medicine                                                        | Public Health, United States Air Force School of Aerospace Medicine                                                        | Fries et al                   |
| EPI_ISL_1055750                                                                                            | QEI Health Sciences Centre                                                                                                 | National Microbiology Laboratory (NML)                                                                                     | Anna Majer et al              |
| EPI_ISL_1249065                                                                                            | Queens Medical Centre, Clinical Microbiology Department / DeepSeq Nottingham                                               | COVID-19 Genomics UK (COG-UK) Consortium                                                                                   | Gemma Clark et al             |
| EPI_ISL_416482                                                                                             | R. G. Lugar Center for Public Health Research, National Center for Disease Control and Public Health (NCDC) of Georgia.    | R. G. Lugar Center for Public Health Research, National Center for Disease Control and Public Health (NCDC) of Georgia.    | Adam Kotorashvili et al       |
| EPI_ISL_416481                                                                                             | R. G. Lugar Center for Public Health Research, National Center for Disease Control and Public Health (NCDC) of Georgia.    | R. G. Lugar Center for Public Health Research, National Center for Disease Control and Public Health (NCDC) of Georgia.    | Gvantsa Chanturia et al       |
| EPI_ISL_416478,EPI_ISL_416479                                                                              | R. G. Lugar Center for Public Health Research, National Center for Disease Control and Public Health (NCDC) of Georgia.    | R. G. Lugar Center for Public Health Research, National Center for Disease Control and Public Health (NCDC) of Georgia.    | Marine Murtskhvaladze et al   |
| EPI_ISL_415641,EPI_ISL_415642,EPI_ISL_415644                                                               | R. G. Lugar Center for Public Health Research, National Center for Disease Control and Public Health (NCDC) of Georgia.    | R. G. Lugar Center for Public Health Research, National Center for Disease Control and Public Health (NCDC) of Georgia.    | Nato Kotaria et al            |
| EPI_ISL_637110,EPI_ISL_637112,EPI_ISL_637113                                                               | Rafik Hariri University Hospital                                                                                           | Microbial Pathogenomics Lab                                                                                                | Georgi Merhi et al            |
| EPI_ISL_450508,EPI_ISL_450509,EPI_ISL_450511,EPI_ISL_450512                                                | Rafik Hariri University Hospital                                                                                           | Rafik Hariri University Hospital                                                                                           | Rita Feghali et al            |
| EPI_ISL_768616                                                                                             | Rajavithi Hospital                                                                                                         | National Institute of Health, Department of Medical Sciences, Ministry of Public Health, Thailand                          | Pilailuk Okada et al          |
| EPI_ISL_445380,EPI_ISL_447006,EPI_ISL_447028,EPI_ISL_455918,EPI_ISL_693383,EPI_ISL_1073964,EPI_ISL_1138846 | Ramathibodi Hospital                                                                                                       | COVID-19 Network Investigations (CONI) Alliance                                                                            | Elizabeth Batty et al         |
| EPI_ISL_768615                                                                                             | Regional Medical Sciences Center 5 Samut Songkhram                                                                         | National Institute of Health, Department of Medical Sciences, Ministry of Public Health, Thailand                          | Pilailuk Okada et al          |
| EPI_ISL_708737,EPI_ISL_708807,EPI_ISL_708806,EPI_ISL_708804                                                | Regional medical sciences center 6 chonburi                                                                                | National Institute of Health, Department of Medical Sciences, Ministry of Public Health, Thailand                          | Pilailuk Okada et al          |
| EPI_ISL_661271                                                                                             | Research platform for Transfusion-transmitted Disease, Institute of Blood Transfusion, Chinese Academy of Medical Sciences | Research platform for Transfusion-transmitted Disease, Institute of Blood Transfusion, Chinese Academy of Medical Sciences | He et al                      |
| EPI_ISL_407071                                                                                             | Respiratory Virus Unit, Microbiology Services Colindale, Public Health England                                             | Respiratory Virus Unit, Microbiology Services Colindale, Public Health England                                             | Monica Galiano et al          |
| EPI_ISL_906851                                                                                             | Respiratory Viruses Branch, Centers for Disease Control and Prevention                                                     | Respiratory Viruses Branch, Centers for Disease Control and Prevention                                                     | Tao et al                     |
| EPI_ISL_430456                                                                                             | Rizal Medical Center                                                                                                       | Research Institute for Tropical Medicine                                                                                   | Medado et al                  |
| EPI_ISL_779406                                                                                             | Royal Darwin Hospital Pathology                                                                                            | MDU-PHL                                                                                                                    | Meumann et al                 |
| EPI_ISL_1284048                                                                                            | RS Bhakti Husada Cikarang                                                                                                  | Eijkman Institute for Molecular Biology, Ministry of Research and Technology/National Agency for Research and Innovation   | Edison Johar et al            |
| EPI_ISL_568693                                                                                             | RS Freeport Tembapapura                                                                                                    | Eijkman Institute for Molecular Biology, Ministry of Research and Technology/National Agency for Research and Innovation   | Frilasita A Yudhaputri et al  |
| EPI_ISL_947290                                                                                             | RS Hermina Bitung                                                                                                          | Eijkman Institute for Molecular Biology, Ministry of Research and Technology/National Agency for Research and Innovation   | Hidayat Trimarsanto et al     |
| EPI_ISL_833510                                                                                             | RS Melania, Bogor, Indonesia                                                                                               | Biosafety Level-3 Laboratory, Indonesian Institute of Sciences (LIPI)                                                      | Anik Budhi Dharmayanthi et al |



|                                                                            |                                                |                                                                                                                                                                                                                                                                                                                                                                                                                                                                                                                                                          |                               |
|----------------------------------------------------------------------------|------------------------------------------------|----------------------------------------------------------------------------------------------------------------------------------------------------------------------------------------------------------------------------------------------------------------------------------------------------------------------------------------------------------------------------------------------------------------------------------------------------------------------------------------------------------------------------------------------------------|-------------------------------|
| EPI_ISL_766036                                                             | RS Mitra Keluarga Bintaro                      | Eijkman Institute for Molecular Biology, Ministry of Research and Technology/National Agency for Research and Innovation                                                                                                                                                                                                                                                                                                                                                                                                                                 | Frilasita A Yudhaputri et al  |
| EPI_ISL_1284314                                                            | RS Mitra Keluarga Kalideres                    | Eijkman Institute for Molecular Biology, Ministry of Research and Technology/National Agency for Research and Innovation                                                                                                                                                                                                                                                                                                                                                                                                                                 | Edison Johar et al            |
| EPI_ISL_1284327                                                            | RS Mitra Keluarga Kalideres                    | Eijkman Institute for Molecular Biology, Ministry of Research and Technology/National Agency for Research and Innovation                                                                                                                                                                                                                                                                                                                                                                                                                                 | Frilasita A Yudhaputri et al  |
| EPI_ISL_833393                                                             | RS MMC Jakarta, Indonesia                      | Biosafety Level-3 Laboratory, Indonesian Institute of Sciences (LIPI)                                                                                                                                                                                                                                                                                                                                                                                                                                                                                    | Anggia Prasetyoputri et al    |
| EPI_ISL_833503                                                             | RS MMC, Jakarta, Indonesia                     | Biosafety Level-3 Laboratory, Indonesian Institute of Sciences (LIPI)                                                                                                                                                                                                                                                                                                                                                                                                                                                                                    | Anggia Prasetyoputri et al    |
| EPI_ISL_833493                                                             | RS PMI Bogor, Indonesia                        | Biosafety Level-3 Laboratory, Indonesian Institute of Sciences (LIPI)                                                                                                                                                                                                                                                                                                                                                                                                                                                                                    | Isa Nuryana et al             |
| EPI_ISL_833506                                                             | RS PMI, Bogor, Indonesia                       | Biosafety Level-3 Laboratory, Indonesian Institute of Sciences (LIPI)                                                                                                                                                                                                                                                                                                                                                                                                                                                                                    | Isa Nuryana et al             |
| EPI_ISL_1117451,EPI_ISL_1137601                                            | RS PMI, Bogor, West Java                       | Biosafety Level-3 Laboratory, Indonesian Institute of Sciences (LIPI)                                                                                                                                                                                                                                                                                                                                                                                                                                                                                    | Anik Budhi Dharmayanthi et al |
| EPI_ISL_833502                                                             | RS Sayang Bunda, Makasar, Indonesia            | Biosafety Level-3 Laboratory, Indonesian Institute of Sciences (LIPI)                                                                                                                                                                                                                                                                                                                                                                                                                                                                                    | Andri Wardiana et al          |
| EPI_ISL_947278                                                             | RS Umum Ciputra Hospital Citragarden City      | Eijkman Institute for Molecular Biology, Ministry of Research and Technology/National Agency for Research and Innovation                                                                                                                                                                                                                                                                                                                                                                                                                                 | Hidayat Trimarsanto et al     |
| EPI_ISL_454497,EPI_ISL_454501,EPI_ISL_454502                               | RSE National Center for Biotechnology""        | RSE National Center for Biotechnology""                                                                                                                                                                                                                                                                                                                                                                                                                                                                                                                  | Alexandr Shevtsov et al       |
| EPI_ISL_1196005                                                            | RSP Clinic                                     | National Institute for Communicable Diseases of the National Health Laboratory Service                                                                                                                                                                                                                                                                                                                                                                                                                                                                   | Maphalala GP et al            |
| EPI_ISL_947304                                                             | RSU Harapan Bunda                              | Eijkman Institute for Molecular Biology, Ministry of Research and Technology/National Agency for Research and Innovation                                                                                                                                                                                                                                                                                                                                                                                                                                 | Iskandar Adnan et al          |
| EPI_ISL_576383                                                             | RSUD Budi Rahayu Kota Magelang                 | Genetics Working Group (Pokja Genetik) Faculty of Medicine, Public Health and Nursing Universitas Gadjah Mada (FK-KMK UGM); Disease Investigation Center Wates Ministry of Agriculture Indonesia; Department of Microbiology FK-KMK UGM; Laboratorium Diagnostik Yayasan Tahija World Mosquito Program (WMP) Yogyakarta Center for Tropical Medicine FK-KMK UGM; Integrated Research Center FK-KMK UGM; Department of Computer Science and Electronics FMIPA UGM; Balai Besar Teknik Kesehatan Lingkungan dan Pengendalian Penyakit (BBTKLPP) Yogyakarta | Gunadi et al                  |
| EPI_ISL_766032                                                             | RSUP Dr. Sardjito                              | Eijkman Institute for Molecular Biology, Ministry of Research and Technology/National Agency for Research and Innovation                                                                                                                                                                                                                                                                                                                                                                                                                                 | Frilasita A Yudhaputri et al  |
| EPI_ISL_491298                                                             | Rural Health Unit - Calauan, Laguna            | Research Institute for Tropical Medicine                                                                                                                                                                                                                                                                                                                                                                                                                                                                                                                 | Tujan et al                   |
| EPI_ISL_707789,EPI_ISL_1063915,EPI_ISL_1064149                             | Rwanda National Reference Laboratory           | Rwanda National Reference Laboratory                                                                                                                                                                                                                                                                                                                                                                                                                                                                                                                     | Enatha Mukantwari et al       |
| EPI_ISL_1064153                                                            | Rwanda National Reference Laboratory           | Rwanda National Reference Laboratory                                                                                                                                                                                                                                                                                                                                                                                                                                                                                                                     | ENatha Mukantwari et al       |
| EPI_ISL_1138512,EPI_ISL_1138513,EPI_ISL_1138515                            | SA Pärnu Hospital Laboratory                   | 1. Laboratory of Communicable Diseases (Estonia); 2. Eurofins Genomics Europe Sequencing GmbH                                                                                                                                                                                                                                                                                                                                                                                                                                                            | Liidia Dotsenko et al         |
| EPI_ISL_732961,EPI_ISL_771367                                              | SA Pathology                                   | SA Pathology                                                                                                                                                                                                                                                                                                                                                                                                                                                                                                                                             | Lex Leong et al               |
| EPI_ISL_684881,EPI_ISL_684964,EPI_ISL_690678                               | Saitama Prefectural Institute of Public Health | Pathogen Genomics Center, National Institute of Infectious Diseases                                                                                                                                                                                                                                                                                                                                                                                                                                                                                      | Tsuyoshi Sekizuka et al       |
| EPI_ISL_749238,EPI_ISL_749474,EPI_ISL_749706,EPI_ISL_750161,EPI_ISL_750162 | Sanatorio Americano                            | Institut Pasteur de Montevideo                                                                                                                                                                                                                                                                                                                                                                                                                                                                                                                           | Daiana Mir et al              |
| EPI_ISL_738684                                                             | Santa Clara County Public Health Laboratory    | Chan-Zuckerberg Biohub                                                                                                                                                                                                                                                                                                                                                                                                                                                                                                                                   | CZB Cliahub Consortium et al  |
| EPI_ISL_528747                                                             | Santo Borromeus Hospital                       | School of Pharmacy & School of Life Sciences and Technology - Institut Teknologi Bandung; Molecular Genetics Laboratory-Faculty of Medicine-Universitas Padjadjaran; Laboratorium Kesehatan Provinsi Jawa Barat                                                                                                                                                                                                                                                                                                                                          | Catur Riani et al             |

|                                                                                                                                                                                                                                  |                                                                                                                                          |                                                                                                                                                                                                               |                                                    |
|----------------------------------------------------------------------------------------------------------------------------------------------------------------------------------------------------------------------------------|------------------------------------------------------------------------------------------------------------------------------------------|---------------------------------------------------------------------------------------------------------------------------------------------------------------------------------------------------------------|----------------------------------------------------|
| EPI_ISL_528749                                                                                                                                                                                                                   | Santosa Hospital Bandung Central                                                                                                         | School of Life Sciences and Technology & School of Pharmacy-Institut Teknologi Bandung; Molecular Genetics Laboratory-Faculty of Medicine-Universitas Padjadjaran; Laboratorium Kesehatan Provinsi Jawa Barat | Husna Nugrahapraja et al                           |
| EPI_ISL_479799                                                                                                                                                                                                                   | Sapporo City Institute of Public Health                                                                                                  | Pathogen Genomics Center, National Institute of Infectious Diseases                                                                                                                                           | Tsuyoshi Sekizuka et al                            |
| EPI_ISL_1046762,EPI_ISL_1046763,EPI_ISL_1046765,EPI_ISL_1128143,EPI_ISL_1131134,EPI_ISL_1198826,EPI_ISL_1198827,EPI_ISL_1198843,EPI_ISL_1198846,EPI_ISL_1198847                                                                  | SARS-CoV-2 testing team, National Institute of Infectious Diseases                                                                       | Pathogen Genomics Center, National Institute of Infectious Diseases                                                                                                                                           | Tsuyoshi Sekizuka et al                            |
| EPI_ISL_1009128,EPI_ISL_1009123,EPI_ISL_1009626,EPI_ISL_1009017,EPI_ISL_1009656,EPI_ISL_1009630,EPI_ISL_1009213,EPI_ISL_1009016,EPI_ISL_1009160                                                                                  | School of Pharmacy                                                                                                                       | School of Pharmacy                                                                                                                                                                                            | Ahmed Kandeil et al                                |
| EPI_ISL_510529                                                                                                                                                                                                                   | School of Veterinary Medicine, Disease Control                                                                                           | School of Veterinary Medicine, Disease Control                                                                                                                                                                | Simulundu et al                                    |
| EPI_ISL_661189,EPI_ISL_676576                                                                                                                                                                                                    | Scientific Veterinary Institute Novi Sad                                                                                                 | Veterinary Specialized Institute Kraljevo", Serbia"                                                                                                                                                           | Vidanovic et al                                    |
| EPI_ISL_1015756                                                                                                                                                                                                                  | Seattle Flu Study                                                                                                                        | Seattle Flu Study                                                                                                                                                                                             | Deborah A. Nickerson et al                         |
| EPI_ISL_1220328                                                                                                                                                                                                                  | SELAS ASTRALAB                                                                                                                           | CNR Virus des Infections Respiratoires - France SUD                                                                                                                                                           | Antonin Bal et al                                  |
| EPI_ISL_421514                                                                                                                                                                                                                   | Sentinelles network                                                                                                                      | National Reference Center for Viruses of Respiratory Infections, Institut Pasteur, Paris                                                                                                                      | Mélanie Albert et al                               |
| EPI_ISL_593936                                                                                                                                                                                                                   | Sentinelles, Fondettes                                                                                                                   | National Reference Center for Viruses of Respiratory Infections, Institut Pasteur, Paris                                                                                                                      | Sylvie Behillil et al                              |
| EPI_ISL_846654                                                                                                                                                                                                                   | Servicio de Microbiología Clínica (Complejo Hospitalario de Navarra, Pamplona), Instituto de Investigación Sanitaria de Navarra (IdiSNA) | SeqCOVID-SPAIN consortium/IBV(CSIC)                                                                                                                                                                           | Carmen Ezpeleta Baquedano et al                    |
| EPI_ISL_537780,EPI_ISL_537781,EPI_ISL_537785,EPI_ISL_654434                                                                                                                                                                      | Servicio de Microbiología, Hospital Miguel Servet, Zaragoza                                                                              | SeqCOVID-SPAIN consortium/IBV(CSIC)                                                                                                                                                                           | Antonio Rezusta López et al                        |
| EPI_ISL_541036                                                                                                                                                                                                                   | Servicio de Microbiología, Hospital Miguel Servet, Zaragoza                                                                              | SeqCOVID-SPAIN consortium/Institute of Biomedicine of Valencia, IBV-CSIC                                                                                                                                      | Antonio Rezusta López et al                        |
| EPI_ISL_691659                                                                                                                                                                                                                   | Servicio de Microbiología, Hospital Universitario Son Espases                                                                            | SeqCOVID-SPAIN consortium/IBV(CSIC)                                                                                                                                                                           | Carla López-Causapé et al                          |
| EPI_ISL_419689                                                                                                                                                                                                                   | Servicio de Microbiología. Consorcio Hospital General Universitario de Valencia                                                          | Sequencing and Bioinformatics Service and Molecular Epidemiology Research Group. FISABIO-Public Health                                                                                                        | Neris Garcia-Gonzalez et al                        |
| EPI_ISL_420600,EPI_ISL_849181,EPI_ISL_849279,EPI_ISL_849281,EPI_ISL_849286,EPI_ISL_849289,EPI_ISL_849302,EPI_ISL_849350,EPI_ISL_849351,EPI_ISL_856763,EPI_ISL_856768,EPI_ISL_856775,EPI_ISL_856790,EPI_ISL_856799,EPI_ISL_856801 | Servicio Virosis Respiratorias-Departamento Virología-INEI                                                                               | Instituto Nacional Enfermedades Infecciosas C.G.Malbran                                                                                                                                                       | Baumeister E. et al                                |
| EPI_ISL_529008                                                                                                                                                                                                                   | Servizio di igiene e sanità pubblica (SIESP)-Teramo                                                                                      | Istituto Zooprofilattico Sperimentale dell'Abruzzo e Molise G.Caporale"                                                                                                                                       | Lorusso A et al                                    |
| EPI_ISL_416334,EPI_ISL_416327,EPI_ISL_416386                                                                                                                                                                                     | Shanghai Public Health Clinical Center, Shanghai Medical College, Fudan University                                                       | National Research Center for Translational Medicine (Shanghai), Ruijin Hospital affiliated to Shanghai Jiao Tong University School of Medicine & Shanghai Public Health Clinical Center                       | Shengyue Wang et al                                |
| EPI_ISL_497950                                                                                                                                                                                                                   | Shaoxing CDC                                                                                                                             | Zhejiang Provincial Center for Disease Control and Prevention                                                                                                                                                 | Yin Chen et al                                     |
| EPI_ISL_1295691                                                                                                                                                                                                                  | Sharp HealthCare Laboratory                                                                                                              | Andersen lab at Scripps Research                                                                                                                                                                              | SEARCH Alliance San Diego with Aaron Harding et al |
| EPI_ISL_582126                                                                                                                                                                                                                   | Sheikh Khalifa Medical City                                                                                                              | Molecular Surveillance lab Sheikh Khalifa Medical City                                                                                                                                                        | Amirtharaj Francis et al                           |

|                                                                                                                                                                      |                                                                                                                                          |                                                                                                                        |                                                                   |
|----------------------------------------------------------------------------------------------------------------------------------------------------------------------|------------------------------------------------------------------------------------------------------------------------------------------|------------------------------------------------------------------------------------------------------------------------|-------------------------------------------------------------------|
| EPI_ISL_582608,EPI_ISL_582614,EPI_ISL_582626,EPI_ISL_582631,EPI_ISL_582633,EPI_ISL_582645,EPI_ISL_582664,EPI_ISL_582667,EPI_ISL_582671,EPI_ISL_582676,EPI_ISL_582685 | Sheikh Khalifa Medical City                                                                                                              | Molecular/Surveillance lab Sheikh Khalifa Medical City                                                                 | Amirtharaj Francis et al                                          |
| EPI_ISL_906091,EPI_ISL_906098                                                                                                                                        | Shimantik Pathology and Diagnostic Center                                                                                                | Child Health Research Foundation                                                                                       | Senjuti Saha et al                                                |
| EPI_ISL_482678,EPI_ISL_482679,EPI_ISL_482681,EPI_ISL_610153                                                                                                          | Singapore General Hospital                                                                                                               | Department of Microbiology                                                                                             | Nurdyana Abdul Rahman et al                                       |
| EPI_ISL_406973                                                                                                                                                       | Singapore General Hospital                                                                                                               | National Public Health Laboratory                                                                                      | Mak et al                                                         |
| EPI_ISL_407987                                                                                                                                                       | Singapore General Hospital                                                                                                               | Programme in Emerging Infectious Diseases, Duke-NUS Medical School                                                     | Danielle E Anderson et al                                         |
| EPI_ISL_833338                                                                                                                                                       | Siniloan Rural Health Unit                                                                                                               | Research Institute for Tropical Medicine                                                                               | Hannah Leah Morito et al                                          |
| EPI_ISL_759957                                                                                                                                                       | Siti Khodijah Hospital                                                                                                                   | Institute of Tropical Disease, Universitas Airlangga                                                                   | Rima R Prasetya et al                                             |
| EPI_ISL_1143242                                                                                                                                                      | Sonic - Labor Dr. von Froreich GmbH                                                                                                      | Robert Koch Institute                                                                                                  | et al                                                             |
| EPI_ISL_1145074,EPI_ISL_1145118                                                                                                                                      | Sonic - MVZ Medizinisches Labor Bremen GmbH                                                                                              | Robert Koch Institute                                                                                                  | et al                                                             |
| EPI_ISL_696289                                                                                                                                                       | Sonora Quest Laboratories, Laboratory Sciences of Arizona                                                                                | TGen North                                                                                                             | Jolene Bowers et al                                               |
| EPI_ISL_672661                                                                                                                                                       | South Eastern Area Laboratory Services (SEALS)                                                                                           | NSW Health Pathology - Institute of Clinical Pathology and Medical Research; Westmead Hospital; University of Sydney   | CIDM-PH et al.                                                    |
| EPI_ISL_1081795                                                                                                                                                      | SOUTH SUPER HI-WAY                                                                                                                       | Philippine Genome Center                                                                                               | Francis A. Tablizo et al                                          |
| EPI_ISL_849736,EPI_ISL_849737                                                                                                                                        | Special Operations Medical Research Division, Defence Services Medical Research Centre                                                   | Special Operations Medical Research Division, Defence Services Medical Research Centre                                 | Oo et al                                                          |
| EPI_ISL_412912                                                                                                                                                       | State Health Office Baden-Württemberg                                                                                                    | Charité Universitätsmedizin Berlin, Institute of Virology                                                              | Victor M Corman et al                                             |
| EPI_ISL_428901                                                                                                                                                       | State Research Center of Virology and Biotechnology VECTOR, Department of Collection of Microorganisms                                   | State Research Center of Virology and Biotechnology VECTOR, Department of Collection of Microorganisms                 | Sergey A. Bodnev et al                                            |
| EPI_ISL_747241                                                                                                                                                       | Subang Public Health Office                                                                                                              | West Java Health Laboratory; School of Life Sciences and Technology, Institut Teknologi Bandung                        | Azzania Fibriani et al                                            |
| EPI_ISL_747236                                                                                                                                                       | Sukabumi Public Health                                                                                                                   | West Java Health Laboratory; School of Life Sciences and Technology, Institut Teknologi Bandung                        | Azzania Fibriani et al                                            |
| EPI_ISL_450747                                                                                                                                                       | Sunnybrook Health Sciences Centre                                                                                                        | Department of Laboratory Medicine and Molecular Diagnostics, Sunnybrook Health Sciences Centre                         | Jalees A. Nasir et al                                             |
| EPI_ISL_1290501                                                                                                                                                      | Swedish national genomic surveillance program of SARS-CoV-2                                                                              | The Public Health Agency of Sweden                                                                                     | Swedish national genomic surveillance program of SARS-CoV-2 et al |
| EPI_ISL_860779                                                                                                                                                       | Swiss National Reference Centre for Influenza                                                                                            | Swiss National Reference Centre for Influenza                                                                          | Ana Rita Gonçalves Cabecinhas et al                               |
| EPI_ISL_1151558                                                                                                                                                      | SYNLAB MVZ Ettlingen                                                                                                                     | Robert Koch Institute                                                                                                  | et al                                                             |
| EPI_ISL_768522                                                                                                                                                       | Synphaet Hospital                                                                                                                        | National Institute of Health, Department of Medical Sciences, Ministry of Public Health, Thailand                      | Pilailuk Okada et al                                              |
| EPI_ISL_411926,EPI_ISL_411927                                                                                                                                        | Taiwan Centers for Disease Control                                                                                                       | Taiwan Centers for Disease Control                                                                                     | Ji-Rong Yang et al                                                |
| EPI_ISL_902922                                                                                                                                                       | Tanjungpura University Hospital                                                                                                          | Tanjungpura University Hospital                                                                                        | Andriani et al                                                    |
| EPI_ISL_911675                                                                                                                                                       | Tanjungpura University Hospital                                                                                                          | Tanjungpura University Hospital                                                                                        | Mahyarudin et al                                                  |
| EPI_ISL_966940                                                                                                                                                       | Technical Support Units for Scientific Research (UATRS), National Centre for Scientific and Technical Research (CNRST)                   | Technical Support Units for Scientific Research (UATRS), National Centre for Scientific and Technical Research (CNRST) | Touil et al                                                       |
| EPI_ISL_733573                                                                                                                                                       | Temporary Specimen Collection Centre                                                                                                     | Hong Kong Department of Health                                                                                         | Alan K.L. Tsang et al                                             |
| EPI_ISL_1182031                                                                                                                                                      | Tempus                                                                                                                                   | Grubaugh Lab - Yale School of Public Health                                                                            | Joseph Fauver et al                                               |
| EPI_ISL_1201880                                                                                                                                                      | Tempus                                                                                                                                   | Grubaugh Lab - Yale School of Public Health                                                                            | Mary Petrone et al                                                |
| EPI_ISL_861754                                                                                                                                                       | Tempus                                                                                                                                   | Grubaugh Lab - Yale School of Public Health                                                                            | Tara Alpert et al                                                 |
| EPI_ISL_1296445                                                                                                                                                      | Thai Red Cross Emerging Infectious Diseases Health Science Centre, Chulalongkorn Hospital, Faculty of Medicine, Chulalongkorn University | Thai Red Cross Emerging Infectious Diseases Center and Faculty of Medicine, Chulalongkorn University                   | Opass Putcharoen et al                                            |

|                                                                                                                                                                      |                                                                                                                                          |                                                                                                                    |                              |
|----------------------------------------------------------------------------------------------------------------------------------------------------------------------|------------------------------------------------------------------------------------------------------------------------------------------|--------------------------------------------------------------------------------------------------------------------|------------------------------|
| EPI_ISL_956275                                                                                                                                                       | Thai Red Cross Emerging Infectious Diseases Health Science Centre, Chulalongkorn Hospital, Faculty of Medicine, Chulalongkorn University | Thai Red Cross Emerging Infectious Diseases Center and Faculty of Medicine, Chulalongkorn University               | Ratima samorn et al          |
| EPI_ISL_918166,EPI_ISL_956272,EPI_ISL_984303,EPI_ISL_984304                                                                                                          | Thai Red Cross Emerging Infectious Diseases Health Science Centre, Chulalongkorn Hospital, Faculty of Medicine, Chulalongkorn University | Thai Red Cross Emerging Infectious Diseases Center and Faculty of Medicine, Chulalongkorn University               | Rome Buathong et al          |
| EPI_ISL_672094                                                                                                                                                       | The Ashley Laboratory, Stanford University                                                                                               | Chan-Zuckerberg Biohub                                                                                             | CZB Cliahub Consortium et al |
| EPI_ISL_756311,EPI_ISL_756357,EPI_ISL_756367                                                                                                                         | The Caribbean Public Health Agency                                                                                                       | Carrington Lab, Department of PreClinical Sciences, Faculty of Medical Sciences, The University of the West Indies | Nikita S. D. Sahadeo et al   |
| EPI_ISL_429080                                                                                                                                                       | The First Affiliated Hospital of Guangzhou Medical University                                                                            | BGI-shenzhen & The First Affiliated Hospital of Guangzhou Medical University                                       | et al                        |
| EPI_ISL_429089                                                                                                                                                       | The First Affiliated Hospital of Guangzhou Medical University                                                                            | BGI-shenzhen & The First Affiliated Hospital of Guangzhou Medical University                                       | Yanqun Wang et al            |
| EPI_ISL_1213586                                                                                                                                                      | The Lord's Grace Medical and Industrial Clinic                                                                                           | Philippine Genome Center                                                                                           | Francis A. Tablizo et al     |
| EPI_ISL_547966,EPI_ISL_547967,EPI_ISL_577635,EPI_ISL_626580,EPI_ISL_626595,EPI_ISL_693681,EPI_ISL_792696,EPI_ISL_792699,EPI_ISL_850667                               | The National Institute of Public Health                                                                                                  | State Veterinary Institute Prague                                                                                  | Nagy et al                   |
| EPI_ISL_513511                                                                                                                                                       | The National Institute of Public Health                                                                                                  | The National Institute of Public Health and State Veterinary Institute Prague                                      | Nagy et al                   |
| EPI_ISL_434572                                                                                                                                                       | The National Institute of Public Health Center for Epidemiology and Microbiology                                                         | The National Institute of Public Health Center for Epidemiology and Microbiology                                   | Alexander Nagy et al         |
| EPI_ISL_417765,EPI_ISL_829970                                                                                                                                        | The National University Hospital of Iceland                                                                                              | deCODE genetics                                                                                                    | Daniel F Gudbjartsson et al  |
| EPI_ISL_891223                                                                                                                                                       | The Oncology Institute Prof. Dr. Ion Chiricuta" Cluj Napoca"                                                                             | Stefan cel Mare" University Metagenomics Lab"                                                                      | Lobiuc Andrei et al          |
| EPI_ISL_754229,EPI_ISL_754230,EPI_ISL_754231                                                                                                                         | The Republican Research and Practical Center for Epidemiology and Microbiology (RRPCEM)                                                  | WHO National Influenza Centre Russian Federation                                                                   | Elena Gasich et al           |
| EPI_ISL_906062                                                                                                                                                       | Tilia Laboratories s.r.o.                                                                                                                | Tilia Laboratories s.r.o.                                                                                          | Sona Pekova et al            |
| EPI_ISL_1196006                                                                                                                                                      | TLC Clinic                                                                                                                               | National Institute for Communicable Diseases of the National Health Laboratory Service                             | Maphalala GP et al           |
| EPI_ISL_684511                                                                                                                                                       | Tokyo Metropolitan Institute of Public Health                                                                                            | Pathogen Genomics Center, National Institute of Infectious Diseases                                                | Tsuyoshi Sekizuka et al      |
| EPI_ISL_586277,EPI_ISL_591105,EPI_ISL_591194,EPI_ISL_755737,EPI_ISL_755738,EPI_ISL_755739,EPI_ISL_755810,EPI_ISL_755889,EPI_ISL_755890,EPI_ISL_755891,EPI_ISL_933658 | Toronto Invasive Bacterial Diseases Network                                                                                              | McMaster University                                                                                                | Allison McGeer et al         |
| EPI_ISL_853143                                                                                                                                                       | Toronto Invasive Bacterial Diseases Network                                                                                              | Ontario Institute for Cancer Research                                                                              | Allison McGeer et al         |
| EPI_ISL_717692,EPI_ISL_717694,EPI_ISL_717697,EPI_ISL_717699,EPI_ISL_717700,EPI_ISL_756362,EPI_ISL_756363                                                             | Trinidad Public Health Laboratory                                                                                                        | Carrington Lab, Department of PreClinical Sciences, Faculty of Medical Sciences, The University of the West Indies | Nikita S. D. Sahadeo et al   |
| EPI_ISL_426631,EPI_ISL_427392,EPI_ISL_436099,EPI_ISL_436108,EPI_ISL_447593,EPI_ISL_457726,EPI_ISL_457733,EPI_ISL_457730                                              | TSGH-CP molecular lab                                                                                                                    | TSGH-CP molecular lab                                                                                              | Cherng-Lih Perng et al       |
| EPI_ISL_444610                                                                                                                                                       | U.S. Naval Medical Research Center Biological Defense Research Directorate                                                               | U.S. Naval Medical Research Center Biological Defense Research Directorate                                         | Voegtly et al                |
| EPI_ISL_537521,EPI_ISL_537601                                                                                                                                        | UCLA Pathology Clinical Microbiology Lab                                                                                                 | Kruglyak Lab                                                                                                       | Guo et al. et al             |
| EPI_ISL_625661                                                                                                                                                       | UCSF Clinical Microbiology Laboratory                                                                                                    | Chan-Zuckerberg Biohub                                                                                             | CZB Cliahub Consortium et al |

|                                                                                                                                                                                                                                                                               |                                                                                                                                  |                                                                                                         |                                  |
|-------------------------------------------------------------------------------------------------------------------------------------------------------------------------------------------------------------------------------------------------------------------------------|----------------------------------------------------------------------------------------------------------------------------------|---------------------------------------------------------------------------------------------------------|----------------------------------|
| EPI_ISL_737933,EPI_ISL_737941,EPI_ISL_737947,EPI_ISL_737963,EPI_ISL_737967,EPI_ISL_737977,EPI_ISL_737989,EPI_ISL_737990,EPI_ISL_738004,EPI_ISL_738009,EPI_ISL_738012,EPI_ISL_738019,EPI_ISL_738020,EPI_ISL_738021,EPI_ISL_738023,EPI_ISL_738039,EPI_ISL_738040,EPI_ISL_738041 | Uganda Central Public Health Lab and Uganda Virus Research Institute                                                             | MRC/UVRI & LSHTM Uganda Research Unit                                                                   | Matthew Cotten et al             |
| EPI_ISL_451185,EPI_ISL_451190,EPI_ISL_451191,EPI_ISL_451192,EPI_ISL_451197                                                                                                                                                                                                    | Uganda Virus Research Institute                                                                                                  | MRC/UVRI & LSHTM Uganda Research Unit                                                                   | Dan Lule Bugembe et al           |
| EPI_ISL_628761,EPI_ISL_648124,EPI_ISL_648125,EPI_ISL_861460                                                                                                                                                                                                                   | UHAS COVID-19 Lab                                                                                                                | UHAS COVID-19 Lab                                                                                       | Kwabena O. Duedu et al           |
| EPI_ISL_732993                                                                                                                                                                                                                                                                | UMMC-Health                                                                                                                      | WHO National Influenza Centre Russian Federation                                                        | Andrey Komissarov et al          |
| EPI_ISL_1020194                                                                                                                                                                                                                                                               | UMMI Hospital, Bogor, West Java                                                                                                  | Biosafety Level-3 Laboratory, Indonesian Institute of Sciences (LIPI)                                   | Anggia Prasetyoputri et al       |
| EPI_ISL_738314                                                                                                                                                                                                                                                                | Unilabs Laboratory Medicine                                                                                                      | Norwegian Institute of Public Health, Department of Virology                                            | Kathrine Stene-Johansen et al    |
| EPI_ISL_1299865,EPI_ISL_1299878                                                                                                                                                                                                                                               | Unit of lab surveillance of viral emerging diseases, National Lab of Influenza                                                   | Respiratory Virus Unit, National Infection Service, Public Health England                               | PHE Covid Sequencing Team et al  |
| EPI_ISL_526277,EPI_ISL_569984,EPI_ISL_570015,EPI_ISL_609810,EPI_ISL_609824                                                                                                                                                                                                    | Unity Health Toronto                                                                                                             | Ontario Institute for Cancer Research                                                                   | Ramzi Fattouh et al              |
| EPI_ISL_445317                                                                                                                                                                                                                                                                | UNIV.DE CHILE HOSP.CLINICO                                                                                                       | Instituto de Salud Publica de Chile                                                                     | Andrés E Castillo et al          |
| EPI_ISL_525467,EPI_ISL_525468                                                                                                                                                                                                                                                 | Universidad Iberoamericana                                                                                                       | International Centre for Genetic Engineering and Biotechnology (ICGEB) and ARGO Open Lab Platform       | Robert Paulino-Ramirez et al     |
| EPI_ISL_523812                                                                                                                                                                                                                                                                | Universidad Iberoamericana, Instituto de Medicina Tropical & Salud Global                                                        | International Centre for Genetic Engineering and Biotechnology (ICGEB) and ARGO Open Lab Platform       | Robert Paulino-Ramirez et al     |
| EPI_ISL_1272076                                                                                                                                                                                                                                                               | Universidade Federal do Norte do Tocantins (UFNT)                                                                                | Laboratório de Bioinformática e Biotecnologia (Labinftec/UFT)                                           | Ueric José Borges de Souza et al |
| EPI_ISL_529962                                                                                                                                                                                                                                                                | Universitas Airlangga Hospital                                                                                                   | Institute of Tropical Disease, Universitas Airlangga                                                    | Jezzy R Dewantari et al          |
| EPI_ISL_462990                                                                                                                                                                                                                                                                | University Clinical Centre of the Republic of Srpska                                                                             | University of Sarajevo, Veterinary Faculty                                                              | Teufik et al                     |
| EPI_ISL_462753                                                                                                                                                                                                                                                                | University Clinical Hospital of Mostar                                                                                           | University of Sarajevo Veterinary Faculty                                                               | Goletic et al                    |
| EPI_ISL_812967,EPI_ISL_812966                                                                                                                                                                                                                                                 | University Clinical Research Center, University of Sciences                                                                      | University Clinical Research Center, University of Sciences                                             | Diarra et al                     |
| EPI_ISL_679532,EPI_ISL_1247987                                                                                                                                                                                                                                                | University College London, Great Ormond Street Hospital for Children NHS Foundation Trust, Imperial College Healthcare NHS Trust | COVID-19 Genomics UK (COG-UK) Consortium                                                                | Sergi Castellano et al           |
| EPI_ISL_982798                                                                                                                                                                                                                                                                | University Health Network/Mount Sinai Hospital Department of Microbiology                                                        | Ontario Institute for Cancer Research                                                                   | Marie-Ming Aynaud et al          |
| EPI_ISL_418275                                                                                                                                                                                                                                                                | University Hospital Basel, Clinical Virology                                                                                     | University Hospital Basel, Clinical Bacteriology                                                        | Hirsch et al                     |
| EPI_ISL_527919,EPI_ISL_581680                                                                                                                                                                                                                                                 | University Hospital Basel, Clinical Virology                                                                                     | University Hospital Basel, Clinical Bacteriology                                                        | Madlen Stange et al              |
| EPI_ISL_930923,EPI_ISL_931078,EPI_ISL_931189,EPI_ISL_931209,EPI_ISL_931028,EPI_ISL_931222,EPI_ISL_931359                                                                                                                                                                      | University Hospital Basel, Clinical Virology                                                                                     | University Hospital Basel, Clinical Bacteriology                                                        | Tim Roloff et al                 |
| EPI_ISL_1272020                                                                                                                                                                                                                                                               | University Hospital Centre Zagreb                                                                                                | Croatian Institute of Public Health                                                                     | Irena Tabain et al               |
| EPI_ISL_710555,EPI_ISL_710556                                                                                                                                                                                                                                                 | University Hospital Dubrava                                                                                                      | Ruder Boškovic Institute; Forensic Science Centre Ivan Vučetić; University of Zagreb Faculty of Science | Robert Belužić et al             |

|                                                                                                                                                                                                                                                                                                                                                                                                                                                                                                                                                                            |                                                                                                         |                                                                                                         |                                 |
|----------------------------------------------------------------------------------------------------------------------------------------------------------------------------------------------------------------------------------------------------------------------------------------------------------------------------------------------------------------------------------------------------------------------------------------------------------------------------------------------------------------------------------------------------------------------------|---------------------------------------------------------------------------------------------------------|---------------------------------------------------------------------------------------------------------|---------------------------------|
| EPI_ISL_847941,EPI_ISL_864644,EPI_ISL_897720,EPI_ISL_897736,EPI_ISL_897779,EPI_ISL_897911,EPI_ISL_897916,EPI_ISL_897931,EPI_ISL_897942,EPI_ISL_897958,EPI_ISL_897959,EPI_ISL_897961,EPI_ISL_897982,EPI_ISL_953683,EPI_ISL_953688,EPI_ISL_953693,EPI_ISL_953703,EPI_ISL_953712,EPI_ISL_953746,EPI_ISL_953747,EPI_ISL_953748,EPI_ISL_953790,EPI_ISL_953792,EPI_ISL_953800,EPI_ISL_953802,EPI_ISL_953827,EPI_ISL_953833,EPI_ISL_953853,EPI_ISL_953908,EPI_ISL_1040366,EPI_ISL_1040368,EPI_ISL_1040409,EPI_ISL_1040418,EPI_ISL_1084969,EPI_ISL_1084987,EPI_ISL_1166653         | University Hospitals of Geneva, Laboratory of Virology                                                  | HUG, Laboratory of Virology and the Health2030 Genome Center                                            | Samuel Cordey et al             |
| EPI_ISL_775652,EPI_ISL_775722                                                                                                                                                                                                                                                                                                                                                                                                                                                                                                                                              | University Medical Center Hamburg Eppendorf                                                             | Heinrich Pette Institute, Leibniz Institute for Experimental Virology                                   | Alexis Robitaille et al         |
| EPI_ISL_1072985                                                                                                                                                                                                                                                                                                                                                                                                                                                                                                                                                            | University of Balamand                                                                                  | Microbial Genomics Lab, Lebanese American University, Byblos                                            | Mira El Chaar et al             |
| EPI_ISL_476072,EPI_ISL_476075,EPI_ISL_476077,EPI_ISL_477013                                                                                                                                                                                                                                                                                                                                                                                                                                                                                                                | University of Debrecen, Department of Medical Microbiology                                              | National Laboratory of Virology, Szentágothai Research Centre                                           | Endre Gábor Tóth et al          |
| EPI_ISL_896373                                                                                                                                                                                                                                                                                                                                                                                                                                                                                                                                                             | University of Medicine and Pharmacy of Craiova                                                          | "Stefan cel Mare" University Metagenomics Lab"                                                          | Lobiuc Andrei et al             |
| EPI_ISL_955173                                                                                                                                                                                                                                                                                                                                                                                                                                                                                                                                                             | University of Sarajevo, Veterinary Faculty, Laboratory for Molecular Diagnostic and Research Laboratory | University of Sarajevo, Veterinary Faculty, Laboratory for Molecular Diagnostic and Research Laboratory | Goletić Š. et al                |
| EPI_ISL_1016843                                                                                                                                                                                                                                                                                                                                                                                                                                                                                                                                                            | University of Sarajevo, Veterinary Faculty, Laboratory for Molecular Diagnostic and Research Laboratory | University of Sarajevo, Veterinary Faculty, Laboratory for Molecular Diagnostic and Research Laboratory | Goletić T. et al                |
| EPI_ISL_955155                                                                                                                                                                                                                                                                                                                                                                                                                                                                                                                                                             | University of Sarajevo, Veterinary Faculty, Laboratory for Molecular Diagnostic and Research Laboratory | University of Sarajevo, Veterinary Faculty, Laboratory for Molecular Diagnostic and Research Laboratory | Goletić T. et al                |
| EPI_ISL_477623,EPI_ISL_677807                                                                                                                                                                                                                                                                                                                                                                                                                                                                                                                                              | University of Szeged, Institute of Clinical Microbiology                                                | National Laboratory of Virology, Szentágothai Research Centre                                           | Endre Gábor Tóth et al          |
| EPI_ISL_977255,EPI_ISL_977256,EPI_ISL_977258,EPI_ISL_977260,EPI_ISL_977270,EPI_ISL_977272,EPI_ISL_977274,EPI_ISL_977276,EPI_ISL_977278,EPI_ISL_977280,EPI_ISL_977284,EPI_ISL_977287,EPI_ISL_977292,EPI_ISL_977296,EPI_ISL_977297,EPI_ISL_977298,EPI_ISL_977335,EPI_ISL_977341,EPI_ISL_977346,EPI_ISL_977347,EPI_ISL_977348,EPI_ISL_977357,EPI_ISL_977383,EPI_ISL_977385,EPI_ISL_977386,EPI_ISL_977391,EPI_ISL_977395,EPI_ISL_977397,EPI_ISL_977398,EPI_ISL_977399,EPI_ISL_977408,EPI_ISL_977410,EPI_ISL_977411,EPI_ISL_977421,EPI_ISL_977460,EPI_ISL_977464,EPI_ISL_977469 | University of Zambia, School of Veterinary Medicine                                                     | UNZAVET and PATH                                                                                        | Mulenga Mwenda-Chimfwembe et al |
| EPI_ISL_856695                                                                                                                                                                                                                                                                                                                                                                                                                                                                                                                                                             | University of Zambia, School of Veterinary Medicine, Disease Control                                    | University of Zambia, School of Veterinary Medicine, Disease Control                                    | Simulundu et al                 |
| EPI_ISL_458285                                                                                                                                                                                                                                                                                                                                                                                                                                                                                                                                                             | unknown                                                                                                 | Bundeswehr Institute of Microbiology                                                                    | Handrick et al                  |
| EPI_ISL_463006                                                                                                                                                                                                                                                                                                                                                                                                                                                                                                                                                             | unknown                                                                                                 | Clinical virology                                                                                       | Fares et al                     |

|                                                                                                                                                                                                                                  |                                                                                                  |                                                                                                                                                                         |                                  |
|----------------------------------------------------------------------------------------------------------------------------------------------------------------------------------------------------------------------------------|--------------------------------------------------------------------------------------------------|-------------------------------------------------------------------------------------------------------------------------------------------------------------------------|----------------------------------|
| EPI_ISL_455693                                                                                                                                                                                                                   | unknown                                                                                          | Department of Microbiology                                                                                                                                              | Gao et al                        |
| EPI_ISL_437615,EPI_ISL_437616,EPI_ISL_437617,EPI_ISL_437621,EPI_ISL_437623,EPI_ISL_437624                                                                                                                                        | unknown                                                                                          | Faculty of Medicine                                                                                                                                                     | Rodpan et al                     |
| EPI_ISL_507020,EPI_ISL_507021                                                                                                                                                                                                    | unknown                                                                                          | Infectious Diseases Research, King Abdullah International Medical Research Center (KAIMRC)                                                                              | Algoribi et al                   |
| EPI_ISL_454152                                                                                                                                                                                                                   | unknown                                                                                          | Instituto Nacional de Saude (INSA)                                                                                                                                      | Borges et al et al               |
| EPI_ISL_476559                                                                                                                                                                                                                   | unknown                                                                                          | Laboratoire Sciences et Technologies de la Santé (STS) Institut Supérieur des Sciences de la Santé Université Hassan 1er, Settat, Morocco                               | Hajar Lemriss et al              |
| EPI_ISL_462434                                                                                                                                                                                                                   | unknown                                                                                          | Laboratory Diagnostic                                                                                                                                                   | Vidanovic et al                  |
| EPI_ISL_450409                                                                                                                                                                                                                   | unknown                                                                                          | Microbiology                                                                                                                                                            | To et al                         |
| EPI_ISL_434564                                                                                                                                                                                                                   | unknown                                                                                          | Microbiology, The University of Hong Kong                                                                                                                               | To et al                         |
| EPI_ISL_483064                                                                                                                                                                                                                   | unknown                                                                                          | Virology, Ecole Nationale Veterinaire de Toulouse                                                                                                                       | Bessiere et al                   |
| EPI_ISL_681952                                                                                                                                                                                                                   | UPMC Clinical Microbiology Laboratory                                                            | Microbial Genomic Epidemiology Laboratory, University of Pittsburgh                                                                                                     | Mustapha M. Mustapha et al       |
| EPI_ISL_676525                                                                                                                                                                                                                   | Uppsala klinisk mikrobiologi                                                                     | The Public Health Agency of Sweden                                                                                                                                      | Department of Microbiology et al |
| EPI_ISL_708815,EPI_ISL_708818,EPI_ISL_708817,EPI_ISL_708816                                                                                                                                                                      | Urban Institute for Disease Prevention and Control                                               | National Institute of Health, Department of Medical Sciences, Ministry of Public Health, Thailand                                                                       | Pilailuk Okada et al             |
| EPI_ISL_470667                                                                                                                                                                                                                   | Utah Public Health Laboratory                                                                    | Utah Public Health Laboratory                                                                                                                                           | Erin Young et al                 |
| EPI_ISL_470723,EPI_ISL_487216                                                                                                                                                                                                    | Utah Public Health Laboratory                                                                    | Utah Public Health Laboratory                                                                                                                                           | Heidi Butz et al                 |
| EPI_ISL_734931,EPI_ISL_734935,EPI_ISL_734938,EPI_ISL_734941,EPI_ISL_734953,EPI_ISL_734955,EPI_ISL_734972,EPI_ISL_734999,EPI_ISL_735004,EPI_ISL_735049,EPI_ISL_735123,EPI_ISL_735152,EPI_ISL_735187,EPI_ISL_735241,EPI_ISL_735243 | UZ Leuven, National Reference Laboratory for Coronaviruses, Laboratory Medicine, Leuven, Belgium | KU Leuven, Rega Institute, Clinical and Epidemiological Virology                                                                                                        | Tony Wawina-Bokalanga et al      |
| EPI_ISL_940866                                                                                                                                                                                                                   | Vaccines and Infectious Diseases Analytics Research Unit (VIDA)                                  | KRISP, KZN Research Innovation and Sequencing Platform                                                                                                                  | Baillie Vicky et al              |
| EPI_ISL_708820                                                                                                                                                                                                                   | Vajira Hospital                                                                                  | National Institute of Health, Department of Medical Sciences, Ministry of Public Health, Thailand                                                                       | Pilailuk Okada et al             |
| EPI_ISL_640097,EPI_ISL_640102                                                                                                                                                                                                    | Vanguard CHC wc VGC                                                                              | NHLS/UCT                                                                                                                                                                | Arash Iranzadeh et al            |
| EPI_ISL_710578                                                                                                                                                                                                                   | Vardcentralen Brinken                                                                            | The Public Health Agency of Sweden                                                                                                                                      | Department of Microbiology et al |
| EPI_ISL_1164509,EPI_ISL_1225202                                                                                                                                                                                                  | Vault Health                                                                                     | Minnesota Department of Health, Public Health Laboratory                                                                                                                | Alexandra Lorentz et al          |
| EPI_ISL_644577                                                                                                                                                                                                                   | Veterinary Specialized Institute Kraljevo", Serbia"                                              | Veterinary Specialized Institute Kraljevo", Serbia"                                                                                                                     | Vidanovic et al                  |
| EPI_ISL_454795                                                                                                                                                                                                                   | Veterinary Specialized Institute Kraljevo                                                        | Veterinary Specialized Institute Kraljevo                                                                                                                               | Vidanovic et al                  |
| EPI_ISL_708823                                                                                                                                                                                                                   | Vibharam Hospital                                                                                | National Institute of Health, Department of Medical Sciences, Ministry of Public Health, Thailand                                                                       | Pilailuk Okada et al             |
| EPI_ISL_456517                                                                                                                                                                                                                   | Victorian Infectious Diseases Reference Laboratory (VIDRL)                                       | Microbiological Diagnostic Unit Public Health Laboratory and Victorian Infectious Diseases Reference Laboratory, Doherty Institute                                      | Caly L. et al                    |
| EPI_ISL_430626,EPI_ISL_430603                                                                                                                                                                                                    | Victorian Infectious Diseases Reference Laboratory (VIDRL)                                       | Microbiological Diagnostic Unit Public Health Laboratory and Victorian Infectious Diseases Reference Laboratory, The Peter Doherty Institute for Infection and Immunity | Caly L. et al                    |
| EPI_ISL_419734                                                                                                                                                                                                                   | Victorian Infectious Diseases Reference Laboratory (VIDRL)                                       | Victorian Infectious Diseases Reference Laboratory and Microbiological Diagnostic Unit Public Health Laboratory, Doherty Institute                                      | Caly L. et al                    |
| EPI_ISL_562200,EPI_ISL_562228,EPI_ISL_562231                                                                                                                                                                                     | Victorian Infectious Diseases Reference Laboratory (VIDRL)                                       | VIDRL and MDU-PHL                                                                                                                                                       | Caly et al                       |
| EPI_ISL_480650,EPI_ISL_480651,EPI_ISL_480700,EPI_ISL_592783,EPI_ISL_640337,EPI_ISL_779605,EPI_ISL_779606,EPI_ISL_854759,EPI_ISL_1249996                                                                                          | Victorian Infectious Diseases Reference Laboratory (VIDRL)                                       | VIDRL and MDU-PHL                                                                                                                                                       | Caly L. et al                    |
| EPI_ISL_1005231                                                                                                                                                                                                                  | Vilnius university hospital Santaros Klinikos, Center of Laboratory Medicine                     | Vilnius university hospital Santaros Klinikos, Center of Laboratory Medicine                                                                                            | Gytis Dudas et al                |

|                                                                                                                                                                                                                                                                |                                                                                                                                                                                  |                                                                                                                                                                                                                                                           |                                   |
|----------------------------------------------------------------------------------------------------------------------------------------------------------------------------------------------------------------------------------------------------------------|----------------------------------------------------------------------------------------------------------------------------------------------------------------------------------|-----------------------------------------------------------------------------------------------------------------------------------------------------------------------------------------------------------------------------------------------------------|-----------------------------------|
| EPI_ISL_934018                                                                                                                                                                                                                                                 | Vilnius university hospital Santaros Klinikos, Center of Laboratory Medicine                                                                                                     | Vilnius university hospital Santaros Klinikos, Center of Laboratory Medicine                                                                                                                                                                              | Ingrida Olendraite et al          |
| EPI_ISL_560405                                                                                                                                                                                                                                                 | Vilnius University Hospital Santaros Klinikos, Vilnius University                                                                                                                | Institute of Biotechnology, Life Sciences Center, Vilnius University and Thermo Fisher Scientific                                                                                                                                                         | Justinas Slikas et al             |
| EPI_ISL_796574,EPI_ISL_899901,EPI_ISL_1001837,EPI_ISL_1002795,EPI_ISL_1002974,EPI_ISL_1002985,EPI_ISL_1003633,EPI_ISL_1003635,EPI_ISL_1004295,EPI_ISL_1004322,EPI_ISL_1004967,EPI_ISL_1194910,EPI_ISL_1129568,EPI_ISL_1195151,EPI_ISL_1259494                  | Viollier AG                                                                                                                                                                      | Department of Biosystems Science and Engineering, ETH Zürich                                                                                                                                                                                              | Chaoran Chen et al                |
| EPI_ISL_728882,EPI_ISL_899913,EPI_ISL_1002389,EPI_ISL_1003335,EPI_ISL_468294,EPI_ISL_468301,EPI_ISL_486447,EPI_ISL_486528,EPI_ISL_498619,EPI_ISL_539418,EPI_ISL_603675,EPI_ISL_1129547,EPI_ISL_1129779,EPI_ISL_1259774                                         | Viollier AG                                                                                                                                                                      | Department of Biosystems Science and Engineering, ETH Zürich                                                                                                                                                                                              | Christian Beisel et al            |
| EPI_ISL_420849,EPI_ISL_420033,EPI_ISL_420031,EPI_ISL_487369,EPI_ISL_487365,EPI_ISL_513611,EPI_ISL_513612,EPI_ISL_513624,EPI_ISL_514113,EPI_ISL_527506,EPI_ISL_527521,EPI_ISL_591083,EPI_ISL_591084,EPI_ISL_591085,EPI_ISL_965122,EPI_ISL_965123,EPI_ISL_965124 | Viral Respiratory Lab, National Institute for Biomedical Research (INRB)                                                                                                         | Pathogen Sequencing Lab, National Institute for Biomedical Research (INRB)                                                                                                                                                                                | Placide Mbala-Kingebeni et al     |
| EPI_ISL_528386                                                                                                                                                                                                                                                 | Viral vaccines, VSVRI- Veterinary serum and vaccine research institute                                                                                                           | Viral vaccines, VSVRI- Veterinary serum and vaccine research institute                                                                                                                                                                                    | Saleh et al                       |
| EPI_ISL_435427                                                                                                                                                                                                                                                 | Virological Research Group, Szentágothai Research Centre                                                                                                                         | Bioinformatics Research Group, Szentágothai Research Centre                                                                                                                                                                                               | Péter Urbán et al                 |
| EPI_ISL_679990                                                                                                                                                                                                                                                 | Virology Department, Sheffield Teaching Hospitals NHS Foundation Trust/Department of Infection, Immunity and Cardiovascular Disease, The Medical School, University of Sheffield | COVID-19 Genomics UK (COG-UK) Consortium                                                                                                                                                                                                                  | Thushan de Silva et al            |
| EPI_ISL_1191597,EPI_ISL_1191600,EPI_ISL_1191602,EPI_ISL_1191603,EPI_ISL_1191604,EPI_ISL_1191605                                                                                                                                                                | Virology Department, Victoria Hospital, Plaine-Wilhems, Mauritius                                                                                                                | National Institute for Communicable Diseases of the National Health Laboratory Service                                                                                                                                                                    | Ramuth M et al                    |
| EPI_ISL_636987                                                                                                                                                                                                                                                 | Virology Lab, National Institute for Biomedical Research (INRB)                                                                                                                  | Project group Epidemiology of Highly Pathogenic Microorganisms, Robert Koch-Institute                                                                                                                                                                     | Jean-Jacques Muyembe Tamfum et al |
| EPI_ISL_467666                                                                                                                                                                                                                                                 | Virology lab, NIC, NCCD, Ulaanbaatar, Mongolia                                                                                                                                   | National Centre for Communicable Diseases (NCCD)                                                                                                                                                                                                          | Naranzul Ts et al                 |
| EPI_ISL_508862,EPI_ISL_508863,EPI_ISL_625456,EPI_ISL_677634,EPI_ISL_677635,EPI_ISL_677636                                                                                                                                                                      | Virology Unit, Institut Pasteur de Madagascar                                                                                                                                    | Virology Unit, Institut Pasteur de Madagascar                                                                                                                                                                                                             | Christian Ranaivoson et al        |
| EPI_ISL_918373,EPI_ISL_918374,EPI_ISL_918375,EPI_ISL_918376,EPI_ISL_933780,EPI_ISL_933781,EPI_ISL_933784,EPI_ISL_933785                                                                                                                                        | Virology Unit, Institut Pasteur du Cambodge                                                                                                                                      | Virology Unit, Institut Pasteur du Cambodge                                                                                                                                                                                                               | Sokhoun Yann et al                |
| EPI_ISL_411902                                                                                                                                                                                                                                                 | Virology Unit, Institut Pasteur du Cambodge.                                                                                                                                     | Virology Unit, Institut Pasteur du Cambodge (Sequencing done by: Jessica E Manning/Jennifer A Bohl at Malaria and Vector Research Research Laboratory, National Institute of Allergy and Infectious Diseases and Vida Ahyong from Chan-Zuckerberg Biohub) | Erik A Karlsson et al             |
| EPI_ISL_862814                                                                                                                                                                                                                                                 | Virology, Ecole Nationale Veterinaire de Toulouse                                                                                                                                | Virology, Ecole Nationale Veterinaire de Toulouse                                                                                                                                                                                                         | Bessiere et al                    |



|                                                                                                                                                 |                                                                                                           |                                                                                                                             |                           |
|-------------------------------------------------------------------------------------------------------------------------------------------------|-----------------------------------------------------------------------------------------------------------|-----------------------------------------------------------------------------------------------------------------------------|---------------------------|
| EPI_ISL_890237                                                                                                                                  | Virology, International Centre for Diarrhoeal Disease Research, Bangladesh (ICDDR,B)                      | International Centre for Diarrhoeal Disease Research (ICDDR,B)                                                              | Hossain et al             |
| EPI_ISL_548102                                                                                                                                  | Waikato Hospital                                                                                          | Institute of Environmental Science and Research (ESR)                                                                       | Xiaoyun Ren et al         |
| EPI_ISL_456398,EPI_ISL_456399                                                                                                                   | Wellington SCL                                                                                            | Institute of Environmental Science and Research (ESR)                                                                       | Matt Storey et al         |
| EPI_ISL_1250695                                                                                                                                 | Wellington SCL (WN)                                                                                       | Institute of Environmental Science and Research (ESR)                                                                       | Rachel Boyle et al        |
| EPI_ISL_1255108,EPI_ISL_1255146,EPI_ISL_1255163,EPI_ISL_1255166,EPI_ISL_1255182,EPI_ISL_1255194,EPI_ISL_1255197,EPI_ISL_1255250,EPI_ISL_1255275 | West African Centre for Cell Biology of Infectious Pathogens (WACCBIP), University of Ghana, Accra, Ghana | West African Centre for Cell Biology of Infectious Pathogens (WACCBIP), University of Ghana, Volta Road, Legon-Accra, Ghana | Collins M. Morang'a et al |
| EPI_ISL_451345                                                                                                                                  | West China Hospital of Sichuan University                                                                 | State Key Laboratory of Biotherapy of Sichuan University                                                                    | Baowen Du et al           |
| EPI_ISL_745033                                                                                                                                  | West Java Health Laboratory                                                                               | West Java Health Laboratory                                                                                                 | Azzania Fibriani et al    |
| EPI_ISL_733286,EPI_ISL_1036272                                                                                                                  | WHO National Influenza Centre Russian Federation                                                          | WHO National Influenza Centre Russian Federation                                                                            | Andrey Komissarov et al   |
| EPI_ISL_860805                                                                                                                                  | WHO/Minsk                                                                                                 | Charité Universitätsmedizin Berlin, Institut für Virologie                                                                  | Victor M Corman et al     |
| EPI_ISL_1196002                                                                                                                                 | Women correctional                                                                                        | National Institute for Communicable Diseases of the National Health Laboratory Service                                      | Maphalala GP et al        |
| EPI_ISL_708813,EPI_ISL_708812                                                                                                                   | World Medical Hospital                                                                                    | National Institute of Health, Department of Medical Sciences, Ministry of Public Health, Thailand                           | Pilailuk Okada et al      |
| EPI_ISL_1239697                                                                                                                                 | WSSE w Krakowie                                                                                           | 1. National Institute of Public Health - National Institute of Hygiene; 2. Eurofins Genomics Europe Sequencing GmbH         | Wołkowicz Tomasz et al    |
| EPI_ISL_402124                                                                                                                                  | Wuhan Jinyintan Hospital                                                                                  | Wuhan Institute of Virology, Chinese Academy of Sciences                                                                    | Peng Zhou et al           |
| EPI_ISL_779153,EPI_ISL_779154                                                                                                                   | Yale Pathology Lab                                                                                        | Grubaugh Lab - Yale School of Public Health                                                                                 | Tara Alpert et al         |
| EPI_ISL_684814                                                                                                                                  | Yamagata Prefectural Institute of Public Health                                                           | Pathogen Genomics Center, National Institute of Infectious Diseases                                                         | Tsuyoshi Sekizuka et al   |
| EPI_ISL_422425                                                                                                                                  | Zhejiang Provincial Center for Disease Control and Prevention                                             | Zhejiang Provincial Center for Disease Control and Prevention                                                               | YanJun Zhang et al        |
